# Supplementary material for: Loss of microRNA-15a/16-1 function promotes neuropathological and functional recovery in experimental traumatic brain injury
Source: PubMed Central journal article supplement (PMC11383186; doi:10.1172/jci.insight.178650), 2024-06-24
Supplement: jciinsight-9-178650-s212.pdf [file jciinsight-9-178650-s212.pdf]

| Figure | n                                                  | Data structure                             | Test used                                               | Statistic         | P value                                                                                                                                                                                                                                                                                                                                                                                                                                                                                                                                                                                                                                                                                                                                                                                                                                                                                                                                                                                                                                                                                                                                                                                                                                                                                                                                                                                                                                                                                                                                                                                                                                                                                                                                                                                                  |
|--------|----------------------------------------------------|--------------------------------------------|---------------------------------------------------------|-------------------|----------------------------------------------------------------------------------------------------------------------------------------------------------------------------------------------------------------------------------------------------------------------------------------------------------------------------------------------------------------------------------------------------------------------------------------------------------------------------------------------------------------------------------------------------------------------------------------------------------------------------------------------------------------------------------------------------------------------------------------------------------------------------------------------------------------------------------------------------------------------------------------------------------------------------------------------------------------------------------------------------------------------------------------------------------------------------------------------------------------------------------------------------------------------------------------------------------------------------------------------------------------------------------------------------------------------------------------------------------------------------------------------------------------------------------------------------------------------------------------------------------------------------------------------------------------------------------------------------------------------------------------------------------------------------------------------------------------------------------------------------------------------------------------------------------|
| 1A     | Sham+WT=12<br>Sham+KO=10<br>TBI+WT=12<br>TBI+KO=12 | Normal distribution, homogeneity variances | Two-way repeated ANOVA, Tukey multiple comparisons test | F (3, 42) = 203.4 | Two-way repeated ANOVA, $p < 0.0001$<br><br>Tukey's multiple comparisons test:<br><br>Pre:<br>Sham+WT vs. Sham+KO: $p = 0.9997$ ,<br>Sham+WT vs. TBI+WT: $p = 0.8449$ ,<br>Sham+WT vs. TBI+KO: $p = 0.663$ ,<br>Sham+KO vs. TBI+WT: $p = 0.754$ ,<br>Sham+KO vs. TBI+KO: $p = 0.5619$ ,<br>TBI+WT vs. TBI+KO: $p = 0.963$<br><br>3d:<br>Sham+WT vs. Sham+KO: $p = 0.1165$ ,<br>Sham+WT vs. TBI+WT: $p < 0.0001$ ,<br>Sham+WT vs. TBI+KO: $p < 0.0001$ ,<br>Sham+KO vs. TBI+WT: $p < 0.0001$ ,<br>Sham+KO vs. TBI+KO: $p < 0.0001$ ,<br>TBI+WT vs. TBI+KO: $p = 0.0003$<br><br>5d:<br>Sham+WT vs. Sham+KO: $p = 0.9401$ ,<br>Sham+WT vs. TBI+WT: $p < 0.0001$ ,<br>Sham+WT vs. TBI+KO: $p < 0.0001$ ,<br>Sham+KO vs. TBI+WT: $p < 0.0001$ ,<br>Sham+KO vs. TBI+KO: $p < 0.0001$ ,<br>TBI+WT vs. TBI+KO: $p = 0.4788$<br><br>7d:<br>Sham+WT vs. Sham+KO: $p > 0.9999$ ,<br>Sham+WT vs. TBI+WT: $p < 0.0001$ ,<br>Sham+WT vs. TBI+KO: $p < 0.0001$ ,<br>Sham+KO vs. TBI+WT: $p < 0.0001$ ,<br>Sham+KO vs. TBI+KO: $p < 0.0001$ ,<br>TBI+WT vs. TBI+KO: $p = 0.0751$<br><br>14d:<br>Sham+WT vs. Sham+KO: $p = 0.9633$ ,<br>Sham+WT vs. TBI+WT: $p < 0.0001$ ,<br>Sham+WT vs. TBI+KO: $p < 0.0001$ ,<br>Sham+KO vs. TBI+WT: $p < 0.0001$ ,<br>Sham+KO vs. TBI+KO: $p < 0.0001$ ,<br>TBI+WT vs. TBI+KO: $p = 0.0015$<br><br>21d:<br>Sham+WT vs. Sham+KO: $p = 0.175$ ,<br>Sham+WT vs. TBI+WT: $p < 0.0001$ ,<br>Sham+WT vs. TBI+KO: $p < 0.0001$ ,<br>Sham+KO vs. TBI+WT: $p < 0.0001$ ,<br>Sham+KO vs. TBI+KO: $p < 0.0001$ ,<br>TBI+WT vs. TBI+KO: $p < 0.0001$<br><br>28d:<br>Sham+WT vs. Sham+KO: $p = 0.8003$ ,<br>Sham+WT vs. TBI+WT: $p < 0.0001$ ,<br>Sham+WT vs. TBI+KO: $p < 0.0001$ ,<br>Sham+KO vs. TBI+WT: $p < 0.0001$ ,<br>Sham+KO vs. TBI+KO: $p < 0.0001$ ,<br>TBI+WT vs. TBI+KO: $p = 0.001$ |
| 1B     | Sham+WT=12<br>Sham+KO=10<br>TBI+WT=12<br>TBI+KO=12 | Normal distribution, homogeneity variances | Two-way repeated ANOVA, Tukey multiple comparisons test | F (3, 42) = 94.31 | Two-way repeated ANOVA, $p < 0.0001$<br><br>Tukey's multiple comparisons test:<br><br>Pre:<br>Sham+WT vs. Sham+KO: $p = 0.4384$<br>Sham+WT vs. TBI+WT: $p = 0.4121$<br>Sham+WT vs. TBI+KO: $p = 0.5984$<br>Sham+KO vs. TBI+WT: $p = 0.9996$<br>Sham+KO vs. TBI+KO: $p = 0.9177$<br>TBI+WT vs. TBI+KO: $p = 0.932$<br><br>3d:<br>Sham+WT vs. Sham+KO: $p = 0.9413$<br>Sham+WT vs. TBI+WT: $p < 0.0001$<br>Sham+WT vs. TBI+KO: $p < 0.0001$<br>Sham+KO vs. TBI+WT: $p < 0.0001$<br>Sham+KO vs. TBI+KO: $p < 0.0001$<br>TBI+WT vs. TBI+KO: $p = 0.0053$                                                                                                                                                                                                                                                                                                                                                                                                                                                                                                                                                                                                                                                                                                                                                                                                                                                                                                                                                                                                                                                                                                                                                                                                                                                     |

| Figure | n                                                  | Data structure                             | Test used                                               | Statistic         | P value                                                                                                                                                                                                                                                                                                                                                                                                                                                                                                                                                                                                                                                                                                                                                                                                                                                                                                                                                                                                                                                                                                                                                                    |
|--------|----------------------------------------------------|--------------------------------------------|---------------------------------------------------------|-------------------|----------------------------------------------------------------------------------------------------------------------------------------------------------------------------------------------------------------------------------------------------------------------------------------------------------------------------------------------------------------------------------------------------------------------------------------------------------------------------------------------------------------------------------------------------------------------------------------------------------------------------------------------------------------------------------------------------------------------------------------------------------------------------------------------------------------------------------------------------------------------------------------------------------------------------------------------------------------------------------------------------------------------------------------------------------------------------------------------------------------------------------------------------------------------------|
|        |                                                    |                                            |                                                         |                   | <p>5d:<br/> Sham+WT vs. Sham+KO: p=0.6383<br/> Sham+WT vs. TBI+WT: p&lt;0.0001<br/> Sham+WT vs. TBI+KO: p&lt;0.0001<br/> Sham+KO vs. TBI+WT: p&lt;0.0001<br/> Sham+KO vs. TBI+KO: p&lt;0.0001<br/> TBI+WT vs. TBI+KO: p=0.0009</p> <p>7d:<br/> Sham+WT vs. Sham+KO: p=0.8685<br/> Sham+WT vs. TBI+WT: p&lt;0.0001<br/> Sham+WT vs. TBI+KO: p=0.0001<br/> Sham+KO vs. TBI+WT: p&lt;0.0001<br/> Sham+KO vs. TBI+KO: p=0.0002<br/> TBI+WT vs. TBI+KO: p=0.0014</p> <p>14d:<br/> Sham+WT vs. Sham+KO: p=0.8231<br/> Sham+WT vs. TBI+WT: p&lt;0.0001<br/> Sham+WT vs. TBI+KO: p&lt;0.0001<br/> Sham+KO vs. TBI+WT: p&lt;0.0001<br/> Sham+KO vs. TBI+KO: p=0.0002<br/> TBI+WT vs. TBI+KO: p=0.0402</p> <p>21d:<br/> Sham+WT vs. Sham+KO: p=0.789<br/> Sham+WT vs. TBI+WT: p&lt;0.0001<br/> Sham+WT vs. TBI+KO: p&lt;0.0001<br/> Sham+KO vs. TBI+WT: p&lt;0.0001<br/> Sham+KO vs. TBI+KO: p&lt;0.0001<br/> TBI+WT vs. TBI+KO: p&lt;0.0001</p> <p>28d:<br/> Sham+WT vs. Sham+KO: p=0.4226<br/> Sham+WT vs. TBI+WT: p&lt;0.0001<br/> Sham+WT vs. TBI+KO: p&lt;0.0001<br/> Sham+KO vs. TBI+WT: p&lt;0.0001<br/> Sham+KO vs. TBI+KO: p&lt;0.0001<br/> TBI+WT vs. TBI+KO: p=0.0005</p> |
| 1C     | Sham+WT=12<br>Sham+KO=10<br>TBI+WT=12<br>TBI+KO=12 | Normal distribution, homogeneity variances | Two-way repeated ANOVA, Tukey multiple comparisons test | F (3, 42) = 195.5 | <p>Two-way repeated ANOVA, p&lt;0.0001</p> <p>Tukey's multiple comparisons test:</p> <p>Pre:<br/> Sham+WT vs. Sham+KO: p=0.3453<br/> Sham+WT vs. TBI+WT: p=0.1904<br/> Sham+WT vs. TBI+KO: p=0.5174<br/> Sham+KO vs. TBI+WT: p=0.9935<br/> Sham+KO vs. TBI+KO: p=0.8629<br/> TBI+WT vs. TBI+KO: p=0.6454</p> <p>3d:<br/> Sham+WT vs. Sham+KO: p=0.9992<br/> Sham+WT vs. TBI+WT: p&lt;0.0001<br/> Sham+WT vs. TBI+KO: p&lt;0.0001<br/> Sham+KO vs. TBI+WT: p&lt;0.0001<br/> Sham+KO vs. TBI+KO: p&lt;0.0001<br/> TBI+WT vs. TBI+KO: p=0.0004</p> <p>5d:<br/> Sham+WT vs. Sham+KO: p=0.6538<br/> Sham+WT vs. TBI+WT: p&lt;0.0001<br/> Sham+WT vs. TBI+KO: p&lt;0.0001<br/> Sham+KO vs. TBI+WT: p&lt;0.0001<br/> Sham+KO vs. TBI+KO: p&lt;0.0001<br/> TBI+WT vs. TBI+KO: p&lt;0.0001</p> <p>7d:<br/> Sham+WT vs. Sham+KO: p=0.9961<br/> Sham+WT vs. TBI+WT: p&lt;0.0001<br/> Sham+WT vs. TBI+KO: p&lt;0.0001<br/> Sham+KO vs. TBI+WT: p&lt;0.0001<br/> Sham+KO vs. TBI+KO: p&lt;0.0001<br/> TBI+WT vs. TBI+KO: p&lt;0.0001</p> <p>14d:<br/> Sham+WT vs. Sham+KO: p=0.8735</p>                                                                                                 |

| Figure | n                                                  | Data structure                             | Test used                                               | Statistic         | P value                                                                                                                                                                                                                                                                                                                                                                                                                                                                                                                                                                                                                                                                                                                                                                                                                                                                                                                                                                                                                                                                                                                                                                                                                                                                                                                                                                                                                                                                                    |
|--------|----------------------------------------------------|--------------------------------------------|---------------------------------------------------------|-------------------|--------------------------------------------------------------------------------------------------------------------------------------------------------------------------------------------------------------------------------------------------------------------------------------------------------------------------------------------------------------------------------------------------------------------------------------------------------------------------------------------------------------------------------------------------------------------------------------------------------------------------------------------------------------------------------------------------------------------------------------------------------------------------------------------------------------------------------------------------------------------------------------------------------------------------------------------------------------------------------------------------------------------------------------------------------------------------------------------------------------------------------------------------------------------------------------------------------------------------------------------------------------------------------------------------------------------------------------------------------------------------------------------------------------------------------------------------------------------------------------------|
|        |                                                    |                                            |                                                         |                   | Sham+WT vs. TBI+WT: p<0.0001<br>Sham+WT vs. TBI+KO: p<0.0001<br>Sham+KO vs. TBI+WT: p<0.0001<br>Sham+KO vs. TBI+KO: p<0.0001<br>TBI+WT vs. TBI+KO: p=0.0008<br><br>21d:<br>Sham+WT vs. Sham+KO: p=0.9813<br>Sham+WT vs. TBI+WT: p<0.0001<br>Sham+WT vs. TBI+KO: p<0.0001<br>Sham+KO vs. TBI+WT: p<0.0001<br>Sham+KO vs. TBI+KO: p<0.0001<br>TBI+WT vs. TBI+KO: p=0.0001<br><br>28d:<br>Sham+WT vs. Sham+KO: p=0.9404<br>Sham+WT vs. TBI+WT: p<0.0001<br>Sham+WT vs. TBI+KO: p<0.0001<br>Sham+KO vs. TBI+WT: p<0.0001<br>Sham+KO vs. TBI+KO: p<0.0001<br>TBI+WT vs. TBI+KO: p=0.0033                                                                                                                                                                                                                                                                                                                                                                                                                                                                                                                                                                                                                                                                                                                                                                                                                                                                                                        |
| 1D     | Sham+WT=12<br>Sham+KO=10<br>TBI+WT=12<br>TBI+KO=12 | Normal distribution, homogeneity variances | Two-way repeated ANOVA, Tukey multiple comparisons test | F (3, 42) = 596.3 | Two-way repeated ANOVA, p<0.0001<br><br>Tukey's multiple comparisons test:<br><br>Pre:<br>Sham+WT vs. Sham+KO: p=0.9012<br>Sham+WT vs. TBI+WT: p=0.9937<br>Sham+WT vs. TBI+KO: p=0.8869<br>Sham+KO vs. TBI+WT: p=0.763<br>Sham+KO vs. TBI+KO: p=0.9992<br>TBI+WT vs. TBI+KO: p=0.6705<br><br>3d:<br>Sham+WT vs. Sham+KO: p>0.9999<br>Sham+WT vs. TBI+WT: p<0.0001<br>Sham+WT vs. TBI+KO: p<0.0001<br>Sham+KO vs. TBI+WT: p<0.0001<br>Sham+KO vs. TBI+KO: p<0.0001<br>TBI+WT vs. TBI+KO: p=0.0012<br><br>5d:<br>Sham+WT vs. Sham+KO: p=0.744<br>Sham+WT vs. TBI+WT: p<0.0001<br>Sham+WT vs. TBI+KO: p<0.0001<br>Sham+KO vs. TBI+WT: p<0.0001<br>Sham+KO vs. TBI+KO: p<0.0001<br>TBI+WT vs. TBI+KO: p=0.0031<br><br>7d:<br>Sham+WT vs. Sham+KO: p=0.7984<br>Sham+WT vs. TBI+WT: p<0.0001<br>Sham+WT vs. TBI+KO: p<0.0001<br>Sham+KO vs. TBI+WT: p<0.0001<br>Sham+KO vs. TBI+KO: p<0.0001<br>TBI+WT vs. TBI+KO: p<0.0001<br><br>14d:<br>Sham+WT vs. Sham+KO: p=0.8801<br>Sham+WT vs. TBI+WT: p<0.0001<br>Sham+WT vs. TBI+KO: p<0.0001<br>Sham+KO vs. TBI+WT: p<0.0001<br>Sham+KO vs. TBI+KO: p<0.0001<br>TBI+WT vs. TBI+KO: p<0.0001<br><br>21d:<br>Sham+WT vs. Sham+KO: p=0.0373<br>Sham+WT vs. TBI+WT: p<0.0001<br>Sham+WT vs. TBI+KO: p<0.0001<br>Sham+KO vs. TBI+WT: p<0.0001<br>Sham+KO vs. TBI+KO: p<0.0001<br>TBI+WT vs. TBI+KO: p<0.0001<br><br>28d:<br>Sham+WT vs. Sham+KO: p>0.9999<br>Sham+WT vs. TBI+WT: p<0.0001<br>Sham+WT vs. TBI+KO: p<0.0001<br>Sham+KO vs. TBI+WT: p<0.0001 |

| Figure | n                                                  | Data structure                             | Test used                                               | Statistic          | P value                                                                                                                                                                                                                                                                                                                                                                                                                                                                                                                                                                                                                                                                                                                                                                                                                                                                                                                                                                                                                                                                                                                                                                                                                                                                                                                                                                                                                                                                                                                                                                                                                                                                                                                           |
|--------|----------------------------------------------------|--------------------------------------------|---------------------------------------------------------|--------------------|-----------------------------------------------------------------------------------------------------------------------------------------------------------------------------------------------------------------------------------------------------------------------------------------------------------------------------------------------------------------------------------------------------------------------------------------------------------------------------------------------------------------------------------------------------------------------------------------------------------------------------------------------------------------------------------------------------------------------------------------------------------------------------------------------------------------------------------------------------------------------------------------------------------------------------------------------------------------------------------------------------------------------------------------------------------------------------------------------------------------------------------------------------------------------------------------------------------------------------------------------------------------------------------------------------------------------------------------------------------------------------------------------------------------------------------------------------------------------------------------------------------------------------------------------------------------------------------------------------------------------------------------------------------------------------------------------------------------------------------|
|        |                                                    |                                            |                                                         |                    | Sham+KO vs. TBI+KO: $p < 0.0001$<br>TBI+WT vs. TBI+KO: $p < 0.0001$                                                                                                                                                                                                                                                                                                                                                                                                                                                                                                                                                                                                                                                                                                                                                                                                                                                                                                                                                                                                                                                                                                                                                                                                                                                                                                                                                                                                                                                                                                                                                                                                                                                               |
| 1E     | Sham+WT=12<br>Sham+KO=10<br>TBI+WT=12<br>TBI+KO=12 | Normal distribution, homogeneity variances | Two-way repeated ANOVA, Tukey multiple comparisons test | $F(3, 42) = 686.1$ | Two-way repeated ANOVA, $p < 0.0001$<br><br>Tukey's multiple comparisons test:<br>Pre:<br>Sham+WT vs. Sham+KO: $p = 0.5639$<br>Sham+WT vs. TBI+WT: $p = 0.8745$<br>Sham+WT vs. TBI+KO: $p = 0.9975$<br>Sham+KO vs. TBI+WT: $p = 0.8665$<br>Sham+KO vs. TBI+KO: $p = 0.405$<br>TBI+WT vs. TBI+KO: $p = 0.7142$<br><br>3d:<br>Sham+WT vs. Sham+KO: $p = 0.0964$<br>Sham+WT vs. TBI+WT: $p < 0.0001$<br>Sham+WT vs. TBI+KO: $p < 0.0001$<br>Sham+KO vs. TBI+WT: $p < 0.0001$<br>Sham+KO vs. TBI+KO: $p < 0.0001$<br>TBI+WT vs. TBI+KO: $p = 0.0442$<br><br>5d:<br>Sham+WT vs. Sham+KO: $p = 0.3068$<br>Sham+WT vs. TBI+WT: $p < 0.0001$<br>Sham+WT vs. TBI+KO: $p < 0.0001$<br>Sham+KO vs. TBI+WT: $p < 0.0001$<br>Sham+KO vs. TBI+KO: $p < 0.0001$<br>TBI+WT vs. TBI+KO: $p = 0.0749$<br><br>7d:<br>Sham+WT vs. Sham+KO: $p = 0.1316$<br>Sham+WT vs. TBI+WT: $p < 0.0001$<br>Sham+WT vs. TBI+KO: $p < 0.0001$<br>Sham+KO vs. TBI+WT: $p < 0.0001$<br>Sham+KO vs. TBI+KO: $p < 0.0001$<br>TBI+WT vs. TBI+KO: $p < 0.0001$<br><br>14d:<br>Sham+WT vs. Sham+KO: $p > 0.9999$<br>Sham+WT vs. TBI+WT: $p < 0.0001$<br>Sham+WT vs. TBI+KO: $p < 0.0001$<br>Sham+KO vs. TBI+WT: $p < 0.0001$<br>Sham+KO vs. TBI+KO: $p < 0.0001$<br>TBI+WT vs. TBI+KO: $p = 0.006$<br><br>21d:<br>Sham+WT vs. Sham+KO: $p > 0.9999$<br>Sham+WT vs. TBI+WT: $p < 0.0001$<br>Sham+WT vs. TBI+KO: $p < 0.0001$<br>Sham+KO vs. TBI+WT: $p < 0.0001$<br>Sham+KO vs. TBI+KO: $p < 0.0001$<br>TBI+WT vs. TBI+KO: $p < 0.0001$<br><br>28d:<br>Sham+WT vs. Sham+KO: $p = 0.7855$<br>Sham+WT vs. TBI+WT: $p < 0.0001$<br>Sham+WT vs. TBI+KO: $p < 0.0001$<br>Sham+KO vs. TBI+WT: $p < 0.0001$<br>Sham+KO vs. TBI+KO: $p < 0.0001$<br>TBI+WT vs. TBI+KO: $p < 0.0001$ |
| 1G     | Sham+WT=12<br>Sham+KO=10<br>TBI+WT=12<br>TBI+KO=12 | Normal distribution, homogeneity variances | Two-way repeated ANOVA, Tukey multiple comparisons test | $F(3, 42) = 30.13$ | Two-way repeated ANOVA, $p < 0.0001$<br><br>Tukey's multiple comparisons test:<br><br>23d:<br>Sham+WT vs. Sham+KO: $p = 0.8881$<br>Sham+WT vs. TBI+WT: $p = 0.9635$<br>Sham+WT vs. TBI+KO: $p = 0.8362$<br>Sham+KO vs. TBI+WT: $p = 0.706$<br>Sham+KO vs. TBI+KO: $p = 0.5437$<br>TBI+WT vs. TBI+KO: $p = 0.9852$<br><br>24d:<br>Sham+WT vs. Sham+KO: $p = 0.9962$<br>Sham+WT vs. TBI+WT: $p = 0.0832$<br>Sham+WT vs. TBI+KO: $p = 0.976$<br>Sham+KO vs. TBI+WT: $p = 0.031$<br>Sham+KO vs. TBI+KO: $p = 0.8912$                                                                                                                                                                                                                                                                                                                                                                                                                                                                                                                                                                                                                                                                                                                                                                                                                                                                                                                                                                                                                                                                                                                                                                                                                  |

| Figure | n                                                  | Data structure                             | Test used                                              | Statistic                                                                                                | P value                                                                                                                                                                                                                                                                                                                                                                                                                                                                                                                                                                                                                                                       |
|--------|----------------------------------------------------|--------------------------------------------|--------------------------------------------------------|----------------------------------------------------------------------------------------------------------|---------------------------------------------------------------------------------------------------------------------------------------------------------------------------------------------------------------------------------------------------------------------------------------------------------------------------------------------------------------------------------------------------------------------------------------------------------------------------------------------------------------------------------------------------------------------------------------------------------------------------------------------------------------|
|        |                                                    |                                            |                                                        |                                                                                                          | TBI+WT vs. TBI+KO: p=0.1429<br><br>25d:<br>Sham+WT vs. Sham+KO: p=0.9854<br>Sham+WT vs. TBI+WT: p=0.0027<br>Sham+WT vs. TBI+KO: p=0.2485<br>Sham+KO vs. TBI+WT: p=0.002<br>Sham+KO vs. TBI+KO: p=0.187<br>TBI+WT vs. TBI+KO: p=0.1582<br><br>26d:<br>Sham+WT vs. Sham+KO: p=0.7178<br>Sham+WT vs. TBI+WT: p=0.0009<br>Sham+WT vs. TBI+KO: p=0.4755<br>Sham+KO vs. TBI+WT: p=0.0002<br>Sham+KO vs. TBI+KO: p=0.1144<br>TBI+WT vs. TBI+KO: p=0.0063<br><br>27d:<br>Sham+WT vs. Sham+KO: p=0.8918<br>Sham+WT vs. TBI+WT: p<0.0001<br>Sham+WT vs. TBI+KO: p=0.0028<br>Sham+KO vs. TBI+WT: p<0.0001<br>Sham+KO vs. TBI+KO: p=0.0308<br>TBI+WT vs. TBI+KO: p<0.0001 |
| 1H     | Sham+WT=12<br>Sham+KO=10<br>TBI+WT=12<br>TBI+KO=12 | Normal distribution, homogeneity variances | One-way ANOVA, Tukey multiple comparisons test         | F (3, 42) = 12.54                                                                                        | One-way ANOVA, p<0.0001<br><br>Tukey's multiple comparisons test:<br><br>Sham+WT vs. Sham+KO: p=0.5536<br>Sham+WT vs. TBI+WT: p=0.0003<br>Sham+WT vs. TBI+KO: p=0.9989<br>Sham+KO vs. TBI+WT: p<0.0001<br>Sham+KO vs. TBI+KO: p=0.4683<br>TBI+WT vs. TBI+KO: p=0.0005                                                                                                                                                                                                                                                                                                                                                                                         |
| 1I     | Sham+WT=12<br>Sham+KO=10<br>TBI+WT=12<br>TBI+KO=12 | Normal distribution, homogeneity variances | One-way ANOVA, Tukey multiple comparisons test         | F (3, 42) = 1.200                                                                                        | One-way ANOVA, p=0.3213<br><br>Tukey's multiple comparisons test:<br><br>Sham+WT vs. Sham+KO: p>0.9999<br>Sham+WT vs. TBI+WT: p=0.3528<br>Sham+WT vs. TBI+KO: p=0.961<br>Sham+KO vs. TBI+WT: p=0.3992<br>Sham+KO vs. TBI+KO: p=0.9676<br>TBI+WT vs. TBI+KO: p=0.6432                                                                                                                                                                                                                                                                                                                                                                                          |
| 1K     | Sham+WT=12<br>Sham+KO=10<br>TBI+WT=12<br>TBI+KO=12 | Normal distribution, homogeneity variances | Kruskal-Wallis test. Dunn's multiple comparisons test. | Kruskal-Wallis statistic = 23.80                                                                         | Kruskal-Wallis test, p<0.0001<br><br>Dunn's multiple comparisons test:<br><br>Sham+WT vs. Sham+KO: p>0.9999<br>Sham+WT vs. TBI+WT: p=0.001<br>Sham+WT vs. TBI+KO: p>0.9999<br>Sham+KO vs. TBI+WT: p<0.0001<br>Sham+KO vs. TBI+KO: p=0.5257<br>TBI+WT vs. TBI+KO: p=0.0201                                                                                                                                                                                                                                                                                                                                                                                     |
| 2B     | TBI+WT=12<br>TBI+KO=12                             | Normal distribution, homogeneity variances | Unpaired t test                                        | t=2.348, df=22                                                                                           | TBI+WT vs. TBI+KO: p=0.0283                                                                                                                                                                                                                                                                                                                                                                                                                                                                                                                                                                                                                                   |
| 2C     | TBI+WT=12<br>TBI+KO=12                             | Normal distribution, homogeneity variances | Unpaired t test                                        | t=1.055, df=22<br>t=1.274, df=22<br>t=1.087, df=22<br>t=2.330, df=22<br>t=1.529, df=22<br>t=2.983, df=22 | TBI+WT vs. TBI+KO Slice 1: p=0.3031<br>TBI+WT vs. TBI+KO Slice 2: p=0.2160<br>TBI+WT vs. TBI+KO Slice 3: p=0.2888<br>TBI+WT vs. TBI+KO Slice 4: p=0.0294<br>TBI+WT vs. TBI+KO Slice 5: p=0.1404<br>TBI+WT vs. TBI+KO Slice 6: p=0.0069                                                                                                                                                                                                                                                                                                                                                                                                                        |
| 2F     | Sham+WT=6<br>Sham+KO=6<br>TBI+WT=6<br>TBI+KO=6     | Normal distribution, homogeneity variances | One-way ANOVA, Tukey multiple comparisons test         | F (3, 20) = 102.9                                                                                        | One-way ANOVA, p<0.0001<br><br>Tukey's multiple comparisons test:<br><br>Sham+WT vs. Sham+KO: p=0.9998<br>Sham+WT vs. TBI+WT: p<0.0001<br>Sham+WT vs. TBI+KO: p<0.0001<br>Sham+KO vs. TBI+WT: p<0.0001<br>Sham+KO vs. TBI+KO: p<0.0001<br>TBI+WT vs. TBI+KO: p=0.0002                                                                                                                                                                                                                                                                                                                                                                                         |
| 2G     | Sham+WT=6<br>Sham+KO=6<br>TBI+WT=6                 | Normal distribution, homogeneity           | One-way ANOVA, Tukey                                   | F (3, 20) = 17.20                                                                                        | One-way ANOVA, p<0.0001<br><br>Tukey's multiple comparisons test:                                                                                                                                                                                                                                                                                                                                                                                                                                                                                                                                                                                             |

| Figure | n                                              | Data structure                             | Test used                                      | Statistic         | P value                                                                                                                                                                                                                                                                |
|--------|------------------------------------------------|--------------------------------------------|------------------------------------------------|-------------------|------------------------------------------------------------------------------------------------------------------------------------------------------------------------------------------------------------------------------------------------------------------------|
|        | TBI+KO=6                                       | variances                                  | multiple comparisons test                      |                   | Sham+WT vs. Sham+KO: p=0.7326<br>Sham+WT vs. TBI+WT: p=0.0001<br>Sham+WT vs. TBI+KO: p=0.0713<br>Sham+KO vs. TBI+WT: p<0.0001<br>Sham+KO vs. TBI+KO: p=0.0079<br>TBI+WT vs. TBI+KO: p=0.0405                                                                           |
| 2H     | Sham+WT=6<br>Sham+KO=6<br>TBI+WT=6<br>TBI+KO=6 | Normal distribution, homogeneity variances | One-way ANOVA, Tukey multiple comparisons test | F (3, 20) = 2.082 | One-way ANOVA, p= 0.1347<br><br>Tukey's multiple comparisons test:<br><br>Sham+WT vs. Sham+KO: p=0.7447<br>Sham+WT vs. TBI+WT: p=0.1574<br>Sham+WT vs. TBI+KO: p=0.2086<br>Sham+KO vs. TBI+WT: p=0.6408<br>Sham+KO vs. TBI+KO: p=0.7375<br>TBI+WT vs. TBI+KO: p=0.9984 |
| 2J     | Sham+WT=6<br>Sham+KO=6<br>TBI+WT=6<br>TBI+KO=6 | Normal distribution, homogeneity variances | One-way ANOVA, Tukey multiple comparisons test | F (3, 20) = 19.23 | One-way ANOVA, p<0.0001<br><br>Tukey's multiple comparisons test:<br><br>Sham+WT vs. Sham+KO: p=0.9994<br>Sham+WT vs. TBI+WT: p<0.0001<br>Sham+WT vs. TBI+KO: p=0.0129<br>Sham+KO vs. TBI+WT: p<0.0001<br>Sham+KO vs. TBI+KO: p=0.0099<br>TBI+WT vs. TBI+KO: p=0.0385  |
| 2K     | Sham+WT=6<br>Sham+KO=6<br>TBI+WT=6<br>TBI+KO=6 | Normal distribution, homogeneity variances | One-way ANOVA, Tukey multiple comparisons test | F (3, 20) = 73.23 | One-way ANOVA, p<0.0001<br><br>Tukey's multiple comparisons test:<br><br>Sham+WT vs. Sham+KO: p=0.9942<br>Sham+WT vs. TBI+WT: p<0.0001<br>Sham+WT vs. TBI+KO: p<0.0001<br>Sham+KO vs. TBI+WT: p<0.0001<br>Sham+KO vs. TBI+KO: p<0.0001<br>TBI+WT vs. TBI+KO: p=0.0001  |
| 2L     | Sham+WT=6<br>Sham+KO=6<br>TBI+WT=6<br>TBI+KO=6 | Normal distribution, homogeneity variances | One-way ANOVA, Tukey multiple comparisons test | F (3, 20) = 1.510 | One-way ANOVA, p=0.2425<br><br>Tukey's multiple comparisons test:<br><br>Sham+WT vs. Sham+KO: p=0.6022<br>Sham+WT vs. TBI+WT: p=0.9905<br>Sham+WT vs. TBI+KO: p=0.8608<br>Sham+KO vs. TBI+WT: p=0.4278<br>Sham+KO vs. TBI+KO: p=0.2083<br>TBI+WT vs. TBI+KO: p=0.9613  |
| 3C     | Sham+WT=6<br>Sham+KO=6<br>TBI+WT=6<br>TBI+KO=6 | Normal distribution, homogeneity variances | One-way ANOVA, Tukey                           | F (3, 20) = 269.4 | One-way ANOVA, p<0.0001<br><br>Tukey's multiple comparisons test:<br><br>Sham+WT vs. Sham+KO: p=0.0729<br>Sham+WT vs. TBI+WT: p<0.0001<br>Sham+WT vs. TBI+KO: p<0.0001<br>Sham+KO vs. TBI+WT: p<0.0001<br>Sham+KO vs. TBI+KO: p<0.0001<br>TBI+WT vs. TBI+KO: p=0.0018  |
| 3D     | Sham+WT=6<br>Sham+KO=6<br>TBI+WT=6<br>TBI+KO=6 | Normal distribution, homogeneity variances | One-way ANOVA, Tukey multiple comparisons test | F (3, 20) = 45.91 | One-way ANOVA, p<0.0001<br><br>Tukey's multiple comparisons test:<br><br>Sham+WT vs. Sham+KO: p=0.9421<br>Sham+WT vs. TBI+WT: p<0.0001<br>Sham+WT vs. TBI+KO: p=0.0006<br>Sham+KO vs. TBI+WT: p<0.0001<br>Sham+KO vs. TBI+KO: p=0.0002<br>TBI+WT vs. TBI+KO: p=0.0005  |
| 3E     | Sham+WT=6<br>Sham+KO=6<br>TBI+WT=6<br>TBI+KO=6 | Normal distribution, homogeneity variances | One-way ANOVA, Tukey multiple comparisons test | F (3, 20) = 55.27 | One-way ANOVA, p<0.0001<br><br>Tukey's multiple comparisons test:<br><br>Sham+WT vs. Sham+KO: p=0.9572<br>Sham+WT vs. TBI+WT: p<0.0001<br>Sham+WT vs. TBI+KO: p=0.0231<br>Sham+KO vs. TBI+WT: p<0.0001<br>Sham+KO vs. TBI+KO: p=0.0659<br>TBI+WT vs. TBI+KO: p<0.0001  |

| Figure | n                                              | Data structure                             | Test used                                      | Statistic         | P value                                                                                                                                                                                                                                                                |
|--------|------------------------------------------------|--------------------------------------------|------------------------------------------------|-------------------|------------------------------------------------------------------------------------------------------------------------------------------------------------------------------------------------------------------------------------------------------------------------|
| 3G     | Sham+WT=6<br>Sham+KO=6<br>TBI+WT=6<br>TBI+KO=6 | Normal distribution, homogeneity variances | One-way ANOVA, Tukey multiple comparisons test | F (3, 20) = 35.74 | One-way ANOVA, p<0.0001<br><br>Tukey's multiple comparisons test:<br><br>Sham+WT vs. Sham+KO: p=0.9628<br>Sham+WT vs. TBI+WT: p<0.0001<br>Sham+WT vs. TBI+KO: p=0.0006<br>Sham+KO vs. TBI+WT: p<0.0001<br>Sham+KO vs. TBI+KO: p=0.0019<br>TBI+WT vs. TBI+KO: p=0.002   |
| 3H     | Sham+WT=6<br>Sham+KO=6<br>TBI+WT=6<br>TBI+KO=6 | Normal distribution, homogeneity variances | One-way ANOVA, Tukey multiple comparisons test | F (3, 20) = 37.51 | One-way ANOVA, p<0.0001<br><br>Tukey's multiple comparisons test:<br><br>Sham+WT vs. Sham+KO: p=0.498<br>Sham+WT vs. TBI+WT: p<0.0001<br>Sham+WT vs. TBI+KO: p=0.003<br>Sham+KO vs. TBI+WT: p<0.0001<br>Sham+KO vs. TBI+KO: p=0.0671<br>TBI+WT vs. TBI+KO: p=<0.0001   |
| 3I     | Sham+WT=6<br>Sham+KO=6<br>TBI+WT=6<br>TBI+KO=6 | Normal distribution, homogeneity variances | One-way ANOVA, Tukey multiple comparisons test | F (3, 20) = 35.16 | One-way ANOVA, p<0.0001<br><br>Tukey's multiple comparisons test:<br><br>Sham+WT vs. Sham+KO: p=0.3926<br>Sham+WT vs. TBI+WT: p<0.0001<br>Sham+WT vs. TBI+KO: p<0.0001<br>Sham+KO vs. TBI+WT: p<0.0001<br>Sham+KO vs. TBI+KO: p=0.0008<br>TBI+WT vs. TBI+KO: p=0.0459  |
| 3J     | Sham+WT=6<br>Sham+KO=6<br>TBI+WT=6<br>TBI+KO=6 | Normal distribution, homogeneity variances | One-way ANOVA, Tukey multiple comparisons test | F (3, 20) = 39.82 | One-way ANOVA, p<0.0001<br><br>Tukey's multiple comparisons test:<br><br>Sham+WT vs. Sham+KO: p=0.8951<br>Sham+WT vs. TBI+WT: p<0.0001<br>Sham+WT vs. TBI+KO: p=0.4235<br>Sham+KO vs. TBI+WT: p<0.0001<br>Sham+KO vs. TBI+KO: p=0.1414<br>TBI+WT vs. TBI+KO: p=<0.0001 |
| 3K     | Sham+WT=6<br>Sham+KO=6<br>TBI+WT=6<br>TBI+KO=6 | Normal distribution, homogeneity variances | One-way ANOVA, Tukey multiple comparisons test | F (3, 20) = 39.51 | One-way ANOVA, p<0.0001<br><br>Tukey's multiple comparisons test:<br><br>Sham+WT vs. Sham+KO: p=0.9533<br>Sham+WT vs. TBI+WT: p<0.0001<br>Sham+WT vs. TBI+KO: p=0.9177<br>Sham+KO vs. TBI+WT: p<0.0001<br>Sham+KO vs. TBI+KO: p=0.658<br>TBI+WT vs. TBI+KO: p=<0.0001  |
| 3L     | Sham+WT=6<br>Sham+KO=6<br>TBI+WT=6<br>TBI+KO=6 | Normal distribution, homogeneity variances | One-way ANOVA, Tukey multiple comparisons test | F (3, 20) = 19.82 | One-way ANOVA, p<0.0001<br><br>Tukey's multiple comparisons test:<br>Sham+WT vs. Sham+KO: p=0.9134<br>Sham+WT vs. TBI+WT: p<0.0001<br>Sham+WT vs. TBI+KO: p=0.1835<br>Sham+KO vs. TBI+WT: p<0.0001<br>Sham+KO vs. TBI+KO: p=0.0537<br>TBI+WT vs. TBI+KO: p=0.0022      |
| 3O     | Sham+WT=6<br>Sham+KO=6<br>TBI+WT=6<br>TBI+KO=6 | Normal distribution, homogeneity variances | One-way ANOVA, Tukey multiple comparisons test | F (3, 20) = 116.5 | One-way ANOVA, p<0.0001<br><br>Tukey's multiple comparisons test:<br><br>Sham+WT vs. Sham+KO: p=0.8034<br>Sham+WT vs. TBI+WT: p<0.0001<br>Sham+WT vs. TBI+KO: p<0.0001<br>Sham+KO vs. TBI+WT: p<0.0001<br>Sham+KO vs. TBI+KO: p<0.0001<br>TBI+WT vs. TBI+KO: p<0.0001  |
| 3P     | Sham+WT=6<br>Sham+KO=6<br>TBI+WT=6<br>TBI+KO=6 | Normal distribution, homogeneity variances | One-way ANOVA, Tukey multiple comparisons test | F (3, 20) = 59.00 | One-way ANOVA, p<0.0001<br><br>Tukey's multiple comparisons test:<br><br>Sham+WT vs. Sham+KO: p=0.5602<br>Sham+WT vs. TBI+WT: p<0.0001<br>Sham+WT vs. TBI+KO: p<0.0001<br>Sham+KO vs. TBI+WT: p<0.0001<br>Sham+KO vs. TBI+KO: p0.0011                                  |

| Figure | n                                              | Data structure                             | Test used                                      | Statistic         | P value                                                                                                                                                                                                                                                               |
|--------|------------------------------------------------|--------------------------------------------|------------------------------------------------|-------------------|-----------------------------------------------------------------------------------------------------------------------------------------------------------------------------------------------------------------------------------------------------------------------|
|        |                                                |                                            |                                                |                   | TBI+WT vs. TBI+KO: p<0.0001                                                                                                                                                                                                                                           |
| 3Q     | Sham+WT=6<br>Sham+KO=6<br>TBI+WT=6<br>TBI+KO=6 | Normal distribution, homogeneity variances | One-way ANOVA, Tukey multiple comparisons test | F (3, 20) = 4.120 | One-way ANOVA, p<0.0001<br><br>Tukey's multiple comparisons test:<br><br>Sham+WT vs. Sham+KO: p=0.9988<br>Sham+WT vs. TBI+WT: p=0.0361<br>Sham+WT vs. TBI+KO: p=0.6427<br>Sham+KO vs. TBI+WT: p=0.0264<br>Sham+KO vs. TBI+KO: p=0.5535<br>TBI+WT vs. TBI+KO: p=0.3156 |
| 4D     | Sham+WT=6<br>Sham+KO=6<br>TBI+WT=6<br>TBI+KO=6 | Normal distribution, homogeneity variances | One-way ANOVA, Tukey multiple comparisons test | F (3, 20) = 107.3 | One-way ANOVA, p<0.0001<br><br>Tukey's multiple comparisons test:<br><br>Sham+WT vs. Sham+KO: p>0.9999<br>Sham+WT vs. TBI+WT: p<0.0001<br>Sham+WT vs. TBI+KO: p<0.0001<br>Sham+KO vs. TBI+WT: p<0.0001<br>Sham+KO vs. TBI+KO: p<0.0001<br>TBI+WT vs. TBI+KO: p<0.0001 |
| 4E     | Sham+WT=6<br>Sham+KO=6<br>TBI+WT=6<br>TBI+KO=6 | Normal distribution, homogeneity variances | One-way ANOVA, Tukey multiple comparisons test | F (3, 20) = 102.3 | One-way ANOVA, p<0.0001<br><br>Tukey's multiple comparisons test:<br><br>Sham+WT vs. Sham+KO: p>0.9999<br>Sham+WT vs. TBI+WT: p<0.0001<br>Sham+WT vs. TBI+KO: p=0.0002<br>Sham+KO vs. TBI+WT: p<0.0001<br>Sham+KO vs. TBI+KO: p=0.0002<br>TBI+WT vs. TBI+KO: p<0.0001 |
| 4F     | Sham+WT=6<br>Sham+KO=6<br>TBI+WT=6<br>TBI+KO=6 | Normal distribution, homogeneity variances | One-way ANOVA, Tukey multiple comparisons test | F (3, 20) = 102.8 | One-way ANOVA, p<0.0001<br><br>Tukey's multiple comparisons test:<br><br>Sham+WT vs. Sham+KO: p>0.9999<br>Sham+WT vs. TBI+WT: p<0.0001<br>Sham+WT vs. TBI+KO: p<0.0001<br>Sham+KO vs. TBI+WT: p<0.0001<br>Sham+KO vs. TBI+KO: p<0.0001<br>TBI+WT vs. TBI+KO: p<0.0001 |
| 4I     | Sham+WT=6<br>Sham+KO=6<br>TBI+WT=6<br>TBI+KO=6 | Normal distribution, homogeneity variances | One-way ANOVA, Tukey multiple comparisons test | F (3, 20) = 176.8 | One-way ANOVA, p<0.0001<br><br>Tukey's multiple comparisons test:<br><br>Sham+WT vs. Sham+KO: p>0.9999<br>Sham+WT vs. TBI+WT: p<0.0001<br>Sham+WT vs. TBI+KO: p<0.0001<br>Sham+KO vs. TBI+WT: p<0.0001<br>Sham+KO vs. TBI+KO: p<0.0001<br>TBI+WT vs. TBI+KO: p<0.0001 |
| 4J     | Sham+WT=6<br>Sham+KO=6<br>TBI+WT=6<br>TBI+KO=6 | Normal distribution, homogeneity variances | One-way ANOVA, Tukey multiple comparisons test | F (3, 20) = 286.4 | One-way ANOVA, p<0.0001<br><br>Tukey's multiple comparisons test:<br><br>Sham+WT vs. Sham+KO: p>0.9999<br>Sham+WT vs. TBI+WT: p<0.0001<br>Sham+WT vs. TBI+KO: p<0.0001<br>Sham+KO vs. TBI+WT: p<0.0001<br>Sham+KO vs. TBI+KO: p<0.0001<br>TBI+WT vs. TBI+KO: p<0.0001 |
| 4M     | Sham+WT=6<br>Sham+KO=6<br>TBI+WT=6<br>TBI+KO=6 | Normal distribution, homogeneity variances | One-way ANOVA, Tukey multiple comparisons test | F (3, 20) = 523.3 | One-way ANOVA, p<0.0001<br><br>Tukey's multiple comparisons test:<br><br>Sham+WT vs. Sham+KO: p>0.9999<br>Sham+WT vs. TBI+WT: p<0.0001<br>Sham+WT vs. TBI+KO: p<0.0001<br>Sham+KO vs. TBI+WT: p<0.0001<br>Sham+KO vs. TBI+KO: p<0.0001<br>TBI+WT vs. TBI+KO: p<0.0001 |
| 4N     | Sham+WT=6<br>Sham+KO=6<br>TBI+WT=6<br>TBI+KO=6 | Normal distribution, homogeneity variances | One-way ANOVA, Tukey multiple comparisons test | F (3, 20) = 166.0 | One-way ANOVA, p<0.0001<br><br>Tukey's multiple comparisons test:<br><br>Sham+WT vs. Sham+KO: p>0.9999<br>Sham+WT vs. TBI+WT: p<0.0001                                                                                                                                |



| Figure | n                                                                          | Data structure                             | Test used                                               | Statistic         | P value                                                                                                                                                                                                                                                                                                                                                                                                                                                                                                                                                                                                                                                                                                                                                                                                                                                                                                                                                                                                                                                                                                                                                                                                                                                                                                                                                                                                                                                                                                                                                                                                                                                                                                                                                                                                                                                                                                                                                                                                                                                                            |
|--------|----------------------------------------------------------------------------|--------------------------------------------|---------------------------------------------------------|-------------------|------------------------------------------------------------------------------------------------------------------------------------------------------------------------------------------------------------------------------------------------------------------------------------------------------------------------------------------------------------------------------------------------------------------------------------------------------------------------------------------------------------------------------------------------------------------------------------------------------------------------------------------------------------------------------------------------------------------------------------------------------------------------------------------------------------------------------------------------------------------------------------------------------------------------------------------------------------------------------------------------------------------------------------------------------------------------------------------------------------------------------------------------------------------------------------------------------------------------------------------------------------------------------------------------------------------------------------------------------------------------------------------------------------------------------------------------------------------------------------------------------------------------------------------------------------------------------------------------------------------------------------------------------------------------------------------------------------------------------------------------------------------------------------------------------------------------------------------------------------------------------------------------------------------------------------------------------------------------------------------------------------------------------------------------------------------------------------|
|        |                                                                            |                                            |                                                         |                   | Sham+WT vs. TBI+KO: p<0.0001<br>Sham+KO vs. TBI+WT: p<0.0001<br>Sham+KO vs. TBI+KO: p<0.0001<br>TBI+WT vs. TBI+KO: p<0.0001                                                                                                                                                                                                                                                                                                                                                                                                                                                                                                                                                                                                                                                                                                                                                                                                                                                                                                                                                                                                                                                                                                                                                                                                                                                                                                                                                                                                                                                                                                                                                                                                                                                                                                                                                                                                                                                                                                                                                        |
| 5A     | Sham+control=10<br>Sham+antagomir=10<br>TBI+control=10<br>TBI+antagomir=10 | Normal distribution, homogeneity variances | Two-way repeated ANOVA, Tukey multiple comparisons test | F (3, 36) = 185.0 | Two-way repeated ANOVA, p<0.0001<br><br>Tukey's multiple comparisons test:<br><br>Pre:<br>Sham+control vs. Sham+antagomir: p=0.4362<br>Sham+control vs. TBI+control: p>0.9999<br>Sham+control vs. TBI+antagomir: p>0.9999<br>Sham+antagomir vs. TBI+control: p=0.507<br>Sham+antagomir vs. TBI+antagomir: p=0.4791<br>TBI+control vs. TBI+antagomir: p=0.9997<br><br>3d:<br>Sham+control vs. Sham+antagomir: p=0.9831<br>Sham+control vs. TBI+control: p<0.0001<br>Sham+control vs. TBI+antagomir: p<0.0001<br>Sham+antagomir vs. TBI+control: p<0.0001<br>Sham+antagomir vs. TBI+antagomir: p<0.0001<br>TBI+control vs. TBI+antagomir: p=0.0003<br><br>5d:<br>Sham+control vs. Sham+antagomir: p=0.3015<br>Sham+control vs. TBI+control: p<0.0001<br>Sham+control vs. TBI+antagomir: p<0.0001<br>Sham+antagomir vs. TBI+control: p<0.0001<br>Sham+antagomir vs. TBI+antagomir: p<0.0001<br>TBI+control vs. TBI+antagomir: p=0.0003<br><br>7d:<br>Sham+control vs. Sham+antagomir: p=0.9592<br>Sham+control vs. TBI+control: p<0.0001<br>Sham+control vs. TBI+antagomir: p<0.0001<br>Sham+antagomir vs. TBI+control: p<0.0001<br>Sham+antagomir vs. TBI+antagomir: p<0.0001<br>TBI+control vs. TBI+antagomir: p=0.0057<br><br>14d:<br>Sham+control vs. Sham+antagomir: p=0.4445<br>Sham+control vs. TBI+control: p<0.0001<br>Sham+control vs. TBI+antagomir: p<0.0001<br>Sham+antagomir vs. TBI+control: p<0.0001<br>Sham+antagomir vs. TBI+antagomir: p<0.0001<br>TBI+control vs. TBI+antagomir: p=0.0088<br><br>21d:<br>Sham+control vs. Sham+antagomir: p=0.9863<br>Sham+control vs. TBI+control: p<0.0001<br>Sham+control vs. TBI+antagomir: p<0.0001<br>Sham+antagomir vs. TBI+control: p<0.0001<br>Sham+antagomir vs. TBI+antagomir: p<0.0001<br>TBI+control vs. TBI+antagomir: p=0.0031<br><br>28d:<br>Sham+control vs. Sham+antagomir: p=0.9894<br>Sham+control vs. TBI+control: p<0.0001<br>Sham+control vs. TBI+antagomir: p<0.0001<br>Sham+antagomir vs. TBI+control: p<0.0001<br>Sham+antagomir vs. TBI+antagomir: p<0.0001<br>TBI+control vs. TBI+antagomir: p=0.0014 |
| 5B     | Sham+control=10<br>Sham+antagomir=10<br>TBI+control=10<br>TBI+antagomir=10 | Normal distribution, homogeneity variances | Two-way repeated ANOVA, Tukey multiple comparisons test | F (3, 36) = 540.2 | Two-way repeated ANOVA, p<0.0001<br><br>Tukey's multiple comparisons test:<br><br>Pre:<br>Sham+control vs. Sham+antagomir: p=0.8123<br>Sham+control vs. TBI+control: p=0.3724<br>Sham+control vs. TBI+antagomir: p=0.667<br>Sham+antagomir vs. TBI+control: p=0.9004<br>Sham+antagomir vs. TBI+antagomir: p=0.9988<br>TBI+control vs. TBI+antagomir: p=0.9277<br><br>3d:<br>Sham+control vs. Sham+antagomir: p=0.9256<br>Sham+control vs. TBI+control: p<0.0001                                                                                                                                                                                                                                                                                                                                                                                                                                                                                                                                                                                                                                                                                                                                                                                                                                                                                                                                                                                                                                                                                                                                                                                                                                                                                                                                                                                                                                                                                                                                                                                                                    |

| Figure | n                                                                          | Data structure                             | Test used                                               | Statistic         | P value                                                                                                                                                                                                                                                                                                                                                                                                                                                                                                                                                                                                                                                                                                                                                                                                                                                                                                                                                                                                                                                                                                                                                                                                                                                                                                                                                                                                                                                                                                                                                                                                                                                                                                                                                                        |
|--------|----------------------------------------------------------------------------|--------------------------------------------|---------------------------------------------------------|-------------------|--------------------------------------------------------------------------------------------------------------------------------------------------------------------------------------------------------------------------------------------------------------------------------------------------------------------------------------------------------------------------------------------------------------------------------------------------------------------------------------------------------------------------------------------------------------------------------------------------------------------------------------------------------------------------------------------------------------------------------------------------------------------------------------------------------------------------------------------------------------------------------------------------------------------------------------------------------------------------------------------------------------------------------------------------------------------------------------------------------------------------------------------------------------------------------------------------------------------------------------------------------------------------------------------------------------------------------------------------------------------------------------------------------------------------------------------------------------------------------------------------------------------------------------------------------------------------------------------------------------------------------------------------------------------------------------------------------------------------------------------------------------------------------|
|        |                                                                            |                                            |                                                         |                   | <p>Sham+control vs. TBI+antagomir: p&lt;0.0001<br/> Sham+antagomir vs. TBI+control: p&lt;0.0001<br/> Sham+antagomir vs. TBI+antagomir: p&lt;0.0001<br/> TBI+control vs. TBI+antagomir: p&lt;0.0001</p> <p>5d:<br/> Sham+control vs. Sham+antagomir: p=0.9904<br/> Sham+control vs. TBI+control: p&lt;0.0001<br/> Sham+antagomir vs. TBI+antagomir: p&lt;0.0001<br/> Sham+antagomir vs. TBI+control: p&lt;0.0001<br/> Sham+antagomir vs. TBI+antagomir: p&lt;0.0001<br/> TBI+control vs. TBI+antagomir: p&lt;0.0001</p> <p>7d:<br/> Sham+control vs. Sham+antagomir: p=0.9993<br/> Sham+control vs. TBI+control: p&lt;0.0001<br/> Sham+control vs. TBI+antagomir: p&lt;0.0001<br/> Sham+antagomir vs. TBI+control: p&lt;0.0001<br/> Sham+antagomir vs. TBI+antagomir: p&lt;0.0001<br/> TBI+control vs. TBI+antagomir: p&lt;0.0001</p> <p>14d:<br/> Sham+control vs. Sham+antagomir: p=0.9059<br/> Sham+control vs. TBI+control: p&lt;0.0001<br/> Sham+control vs. TBI+antagomir: p&lt;0.0001<br/> Sham+antagomir vs. TBI+control: p&lt;0.0001<br/> Sham+antagomir vs. TBI+antagomir: p&lt;0.0001<br/> TBI+control vs. TBI+antagomir: p&lt;0.0001</p> <p>21d:<br/> Sham+control vs. Sham+antagomir: p=0.9156<br/> Sham+control vs. TBI+control: p&lt;0.0001<br/> Sham+control vs. TBI+antagomir: p&lt;0.0001<br/> Sham+antagomir vs. TBI+control: p&lt;0.0001<br/> Sham+antagomir vs. TBI+antagomir: p&lt;0.0001<br/> TBI+control vs. TBI+antagomir: p=0.0009</p> <p>28d:<br/> Sham+control vs. Sham+antagomir: p&gt;0.9999<br/> Sham+control vs. TBI+control: p&lt;0.0001<br/> Sham+control vs. TBI+antagomir: p&lt;0.0001<br/> Sham+antagomir vs. TBI+control: p&lt;0.0001<br/> Sham+antagomir vs. TBI+antagomir: p&lt;0.0001<br/> TBI+control vs. TBI+antagomir: p=0.0005</p> |
| 5C     | Sham+control=10<br>Sham+antagomir=10<br>TBI+control=10<br>TBI+antagomir=10 | Normal distribution, homogeneity variances | Two-way repeated ANOVA, Tukey multiple comparisons test | F (3, 36) = 574.6 | <p>Two-way repeated ANOVA, p&lt;0.0001</p> <p>Tukey's multiple comparisons test:</p> <p>Pre:<br/> Sham+control vs. Sham+antagomir: p&gt;0.9999<br/> Sham+control vs. TBI+control: p=0.9532<br/> Sham+control vs. TBI+antagomir: p&gt;0.9999<br/> Sham+antagomir vs. TBI+control: p=0.9102<br/> Sham+antagomir vs. TBI+antagomir: p&gt;0.9999<br/> TBI+control vs. TBI+antagomir: p=0.9103</p> <p>3d:<br/> Sham+control vs. Sham+antagomir: p=0.828<br/> Sham+control vs. TBI+control: p&lt;0.0001<br/> Sham+control vs. TBI+antagomir: p&lt;0.0001<br/> Sham+antagomir vs. TBI+control: p&lt;0.0001<br/> Sham+antagomir vs. TBI+antagomir: p&lt;0.0001<br/> TBI+control vs. TBI+antagomir: p&lt;0.0001</p> <p>5d:<br/> Sham+control vs. Sham+antagomir: p=0.5959<br/> Sham+control vs. TBI+control: p&lt;0.0001<br/> Sham+control vs. TBI+antagomir: p&lt;0.0001<br/> Sham+antagomir vs. TBI+control: p&lt;0.0001<br/> Sham+antagomir vs. TBI+antagomir: p&lt;0.0001<br/> TBI+control vs. TBI+antagomir: p&lt;0.0001</p> <p>7d:<br/> Sham+control vs. Sham+antagomir: p=0.6212<br/> Sham+control vs. TBI+control: p&lt;0.0001<br/> Sham+control vs. TBI+antagomir: p&lt;0.0001<br/> Sham+antagomir vs. TBI+control: p&lt;0.0001<br/> Sham+antagomir vs. TBI+antagomir: p&lt;0.0001</p>                                                                                                                                                                                                                                                                                                                                                                                                                                                                                         |

| Figure | n                                                                          | Data structure                             | Test used                                               | Statistic          | P value                                                                                                                                                                                                                                                                                                                                                                                                                                                                                                                                                                                                                                                                                                                                                                                                                                                                                                                                                                                                                                                                                                                                                                                                                                                                                                                                                                                                                                                                                                                                                                                                                                                                                                                                                                                                                                                                                                                                                                                                                                                                                                                                                                                                                                                                                                                                                                                                                                                                                                                                                                                                                                                                                                                                                                                                                                     |
|--------|----------------------------------------------------------------------------|--------------------------------------------|---------------------------------------------------------|--------------------|---------------------------------------------------------------------------------------------------------------------------------------------------------------------------------------------------------------------------------------------------------------------------------------------------------------------------------------------------------------------------------------------------------------------------------------------------------------------------------------------------------------------------------------------------------------------------------------------------------------------------------------------------------------------------------------------------------------------------------------------------------------------------------------------------------------------------------------------------------------------------------------------------------------------------------------------------------------------------------------------------------------------------------------------------------------------------------------------------------------------------------------------------------------------------------------------------------------------------------------------------------------------------------------------------------------------------------------------------------------------------------------------------------------------------------------------------------------------------------------------------------------------------------------------------------------------------------------------------------------------------------------------------------------------------------------------------------------------------------------------------------------------------------------------------------------------------------------------------------------------------------------------------------------------------------------------------------------------------------------------------------------------------------------------------------------------------------------------------------------------------------------------------------------------------------------------------------------------------------------------------------------------------------------------------------------------------------------------------------------------------------------------------------------------------------------------------------------------------------------------------------------------------------------------------------------------------------------------------------------------------------------------------------------------------------------------------------------------------------------------------------------------------------------------------------------------------------------------|
|        |                                                                            |                                            |                                                         |                    | <p>TBI+control vs. TBI+antagomir: <math>p&lt;0.0001</math></p> <p>14d:<br/>           Sham+control vs. Sham+antagomir: <math>p=0.5845</math><br/>           Sham+control vs. TBI+control: <math>p&lt;0.0001</math><br/>           Sham+control vs. TBI+antagomir: <math>p&lt;0.0001</math><br/>           Sham+antagomir vs. TBI+control: <math>p&lt;0.0001</math><br/>           Sham+antagomir vs. TBI+antagomir: <math>p&lt;0.0001</math><br/>           TBI+control vs. TBI+antagomir: <math>p=0.0001</math></p> <p>21d:<br/>           Sham+control vs. Sham+antagomir: <math>p=0.8475</math><br/>           Sham+control vs. TBI+control: <math>p&lt;0.0001</math><br/>           Sham+control vs. TBI+antagomir: <math>p&lt;0.0001</math><br/>           Sham+antagomir vs. TBI+control: <math>p&lt;0.0001</math><br/>           Sham+antagomir vs. TBI+antagomir: <math>p&lt;0.0001</math><br/>           TBI+control vs. TBI+antagomir: <math>p=0.0002</math></p> <p>28d:<br/>           Sham+control vs. Sham+antagomir: <math>p=0.946</math><br/>           Sham+control vs. TBI+control: <math>p&lt;0.0001</math><br/>           Sham+control vs. TBI+antagomir: <math>p&lt;0.0001</math><br/>           Sham+antagomir vs. TBI+control: <math>p&lt;0.0001</math><br/>           Sham+antagomir vs. TBI+antagomir: <math>p&lt;0.0001</math><br/>           TBI+control vs. TBI+antagomir: <math>p&lt;0.0001</math></p>                                                                                                                                                                                                                                                                                                                                                                                                                                                                                                                                                                                                                                                                                                                                                                                                                                                                                                                                                                                                                                                                                                                                                                                                                                                                                                                                                                                                          |
| 5D     | Sham+control=10<br>Sham+antagomir=10<br>TBI+control=10<br>TBI+antagomir=10 | Normal distribution, homogeneity variances | Two-way repeated ANOVA, Tukey multiple comparisons test | $F(3, 36) = 955.2$ | <p>Two-way repeated ANOVA, <math>p&lt;0.0001</math></p> <p>Tukey's multiple comparisons test:</p> <p>Pre:<br/>           Sham+control vs. Sham+antagomir: <math>p=0.9076</math><br/>           Sham+control vs. TBI+control: <math>p&gt;0.9999</math><br/>           Sham+control vs. TBI+antagomir: <math>p=0.7505</math><br/>           Sham+antagomir vs. TBI+control: <math>p=0.8624</math><br/>           Sham+antagomir vs. TBI+antagomir: <math>p=0.9846</math><br/>           TBI+control vs. TBI+antagomir: <math>p=0.6602</math></p> <p>3d:<br/>           Sham+control vs. Sham+antagomir: <math>p&gt;0.9999</math><br/>           Sham+control vs. TBI+control: <math>p&lt;0.0001</math><br/>           Sham+control vs. TBI+antagomir: <math>p&lt;0.0001</math><br/>           Sham+antagomir vs. TBI+control: <math>p&lt;0.0001</math><br/>           Sham+antagomir vs. TBI+antagomir: <math>p&lt;0.0001</math><br/>           TBI+control vs. TBI+antagomir: <math>p=0.0161</math></p> <p>5d:<br/>           Sham+control vs. Sham+antagomir: <math>p=0.3139</math><br/>           Sham+control vs. TBI+control: <math>p&lt;0.0001</math><br/>           Sham+control vs. TBI+antagomir: <math>p&lt;0.0001</math><br/>           Sham+antagomir vs. TBI+control: <math>p&lt;0.0001</math><br/>           Sham+antagomir vs. TBI+antagomir: <math>p&lt;0.0001</math><br/>           TBI+control vs. TBI+antagomir: <math>p=0.0009</math></p> <p>7d:<br/>           Sham+control vs. Sham+antagomir: <math>p=0.6088</math><br/>           Sham+control vs. TBI+control: <math>p&lt;0.0001</math><br/>           Sham+control vs. TBI+antagomir: <math>p&lt;0.0001</math><br/>           Sham+antagomir vs. TBI+control: <math>p&lt;0.0001</math><br/>           Sham+antagomir vs. TBI+antagomir: <math>p&lt;0.0001</math><br/>           TBI+control vs. TBI+antagomir: <math>p=0.0019</math></p> <p>14d:<br/>           Sham+control vs. Sham+antagomir: <math>p=0.7498</math><br/>           Sham+control vs. TBI+control: <math>p&lt;0.0001</math><br/>           Sham+control vs. TBI+antagomir: <math>p&lt;0.0001</math><br/>           Sham+antagomir vs. TBI+control: <math>p&lt;0.0001</math><br/>           Sham+antagomir vs. TBI+antagomir: <math>p&lt;0.0001</math><br/>           TBI+control vs. TBI+antagomir: <math>p=0.0002</math></p> <p>21d:<br/>           Sham+control vs. Sham+antagomir: <math>p=0.9937</math><br/>           Sham+control vs. TBI+control: <math>p&lt;0.0001</math><br/>           Sham+control vs. TBI+antagomir: <math>p&lt;0.0001</math><br/>           Sham+antagomir vs. TBI+control: <math>p&lt;0.0001</math><br/>           Sham+antagomir vs. TBI+antagomir: <math>p&lt;0.0001</math><br/>           TBI+control vs. TBI+antagomir: <math>p&lt;0.0001</math></p> <p>28d:</p> |

| Figure | n                                                                          | Data structure                               | Test used                                               | Statistic         | P value                                                                                                                                                                                                                                                                                                                                                                                                                                                                                                                                                                                                                                                                                                                                                                                                                                                                                                                                                                                                                                                                                                                                                                                                                                                                                                                                                                                                                                                                                                                                                                                                                                                                                                                                                                                                                                                                                                                                                                                                                                                                            |
|--------|----------------------------------------------------------------------------|----------------------------------------------|---------------------------------------------------------|-------------------|------------------------------------------------------------------------------------------------------------------------------------------------------------------------------------------------------------------------------------------------------------------------------------------------------------------------------------------------------------------------------------------------------------------------------------------------------------------------------------------------------------------------------------------------------------------------------------------------------------------------------------------------------------------------------------------------------------------------------------------------------------------------------------------------------------------------------------------------------------------------------------------------------------------------------------------------------------------------------------------------------------------------------------------------------------------------------------------------------------------------------------------------------------------------------------------------------------------------------------------------------------------------------------------------------------------------------------------------------------------------------------------------------------------------------------------------------------------------------------------------------------------------------------------------------------------------------------------------------------------------------------------------------------------------------------------------------------------------------------------------------------------------------------------------------------------------------------------------------------------------------------------------------------------------------------------------------------------------------------------------------------------------------------------------------------------------------------|
|        |                                                                            |                                              |                                                         |                   | Sham+control vs. Sham+antagomir: p=0.7877<br>Sham+control vs. TBI+control: p<0.0001<br>Sham+control vs. TBI+antagomir: p<0.0001<br>Sham+antagomir vs. TBI+control: p<0.0001<br>Sham+antagomir vs. TBI+antagomir: p<0.0001<br>TBI+control vs. TBI+antagomir: p<0.0001                                                                                                                                                                                                                                                                                                                                                                                                                                                                                                                                                                                                                                                                                                                                                                                                                                                                                                                                                                                                                                                                                                                                                                                                                                                                                                                                                                                                                                                                                                                                                                                                                                                                                                                                                                                                               |
| 5E     | Sham+control=10<br>Sham+antagomir=10<br>TBI+control=10<br>TBI+antagomir=10 | Normal distribution, homogeneity variances n | Two-way repeated ANOVA, Tukey multiple comparisons test | F (3, 36) = 813.1 | Two-way repeated ANOVA, p<0.0001<br><br>Tukey's multiple comparisons test:<br><br>Pre:<br>Sham+control vs. Sham+antagomir: p>0.9999<br>Sham+control vs. TBI+control: p=0.6688<br>Sham+control vs. TBI+antagomir: p=0.5535<br>Sham+antagomir vs. TBI+control: p=0.8379<br>Sham+antagomir vs. TBI+antagomir: p=0.754<br>TBI+control vs. TBI+antagomir: p=0.9964<br><br>3d:<br>Sham+control vs. Sham+antagomir: p=0.6525<br>Sham+control vs. TBI+control: p<0.0001<br>Sham+control vs. TBI+antagomir: p<0.0001<br>Sham+antagomir vs. TBI+control: p<0.0001<br>Sham+antagomir vs. TBI+antagomir: p<0.0001<br>TBI+control vs. TBI+antagomir: p=0.0013<br><br>5d:<br>Sham+control vs. Sham+antagomir: p=0.6765<br>Sham+control vs. TBI+control: p<0.0001<br>Sham+control vs. TBI+antagomir: p<0.0001<br>Sham+antagomir vs. TBI+control: p<0.0001<br>Sham+antagomir vs. TBI+antagomir: p<0.0001<br>TBI+control vs. TBI+antagomir: p=0.0083<br><br>7d:<br>Sham+control vs. Sham+antagomir: p=0.9421<br>Sham+control vs. TBI+control: p<0.0001<br>Sham+control vs. TBI+antagomir: p<0.0001<br>Sham+antagomir vs. TBI+control: p<0.0001<br>Sham+antagomir vs. TBI+antagomir: p<0.0001<br>TBI+control vs. TBI+antagomir: p=0.0302<br><br>14d:<br>Sham+control vs. Sham+antagomir: p=0.7063<br>Sham+control vs. TBI+control: p<0.0001<br>Sham+control vs. TBI+antagomir: p<0.0001<br>Sham+antagomir vs. TBI+control: p<0.0001<br>Sham+antagomir vs. TBI+antagomir: p<0.0001<br>TBI+control vs. TBI+antagomir: p=0.0004<br><br>21d:<br>Sham+control vs. Sham+antagomir: p=0.9938<br>Sham+control vs. TBI+control: p<0.0001<br>Sham+control vs. TBI+antagomir: p<0.0001<br>Sham+antagomir vs. TBI+control: p<0.0001<br>Sham+antagomir vs. TBI+antagomir: p<0.0001<br>TBI+control vs. TBI+antagomir: p=0.0005<br><br>28d:<br>Sham+control vs. Sham+antagomir: p=0.8951<br>Sham+control vs. TBI+control: p<0.0001<br>Sham+control vs. TBI+antagomir: p<0.0001<br>Sham+antagomir vs. TBI+control: p<0.0001<br>Sham+antagomir vs. TBI+antagomir: p<0.0001<br>TBI+control vs. TBI+antagomir: p<0.0001 |
| 5G     | Sham+control=10<br>Sham+antagomir=10<br>TBI+control=10<br>TBI+antagomir=10 | Normal distribution, homogeneity variances   | Two-way repeated ANOVA, Tukey multiple comparisons test | F (3, 36) = 51.17 | Two-way repeated ANOVA, p<0.0001<br><br>Tukey's multiple comparisons test:<br><br>22d:<br>Sham+control vs. Sham+antagomir: p=0.8242<br>Sham+control vs. TBI+control: p=0.1248<br>Sham+control vs. TBI+antagomir: p=0.9998<br>Sham+antagomir vs. TBI+control: p=0.0591<br>Sham+antagomir vs. TBI+antagomir: p=0.8739<br>TBI+control vs. TBI+antagomir: p=0.1509<br><br>33d:                                                                                                                                                                                                                                                                                                                                                                                                                                                                                                                                                                                                                                                                                                                                                                                                                                                                                                                                                                                                                                                                                                                                                                                                                                                                                                                                                                                                                                                                                                                                                                                                                                                                                                         |

| Figure | n                                                                          | Data structure                             | Test used                                              | Statistic                        | P value                                                                                                                                                                                                                                                                                                                                                                                                                                                                                                                                                                                                                                                                                                                                                                                                                                                                                                                                                                                                                                                                                                                                                                                                  |
|--------|----------------------------------------------------------------------------|--------------------------------------------|--------------------------------------------------------|----------------------------------|----------------------------------------------------------------------------------------------------------------------------------------------------------------------------------------------------------------------------------------------------------------------------------------------------------------------------------------------------------------------------------------------------------------------------------------------------------------------------------------------------------------------------------------------------------------------------------------------------------------------------------------------------------------------------------------------------------------------------------------------------------------------------------------------------------------------------------------------------------------------------------------------------------------------------------------------------------------------------------------------------------------------------------------------------------------------------------------------------------------------------------------------------------------------------------------------------------|
|        |                                                                            |                                            |                                                        |                                  | <p>Sham+control vs. Sham+antagomir: p=0.9996<br/> Sham+control vs. TBI+control: p=0.0001<br/> Sham+control vs. TBI+antagomir: p=0.1825<br/> Sham+antagomir vs. TBI+control: p=0.0017<br/> Sham+antagomir vs. TBI+antagomir: p=0.2739<br/> TBI+control vs. TBI+antagomir: p=0.006</p> <p>24d:<br/> Sham+control vs. Sham+antagomir: p=0.4085<br/> Sham+control vs. TBI+control: p&lt;0.0001<br/> Sham+control vs. TBI+antagomir: p=0.2019<br/> Sham+antagomir vs. TBI+control: p&lt;0.0001<br/> Sham+antagomir vs. TBI+antagomir: p=0.0276<br/> TBI+control vs. TBI+antagomir: p=0.0005</p> <p>25d:<br/> Sham+control vs. Sham+antagomir: p=0.9992<br/> Sham+control vs. TBI+control: p&lt;0.0001<br/> Sham+control vs. TBI+antagomir: p=0.5635<br/> Sham+antagomir vs. TBI+control: p&lt;0.0001<br/> Sham+antagomir vs. TBI+antagomir: p=0.5211<br/> TBI+control vs. TBI+antagomir: p=0.0005</p> <p>26d:<br/> Sham+control vs. Sham+antagomir: p=0.2193<br/> Sham+control vs. TBI+control: p&lt;0.0001<br/> Sham+control vs. TBI+antagomir: p=0.2345<br/> Sham+antagomir vs. TBI+control: p&lt;0.0001<br/> Sham+antagomir vs. TBI+antagomir: p=0.009<br/> TBI+control vs. TBI+antagomir: p&lt;0.0001</p> |
| 5H     | Sham+control=10<br>Sham+antagomir=10<br>TBI+control=10<br>TBI+antagomir=10 | Normal distribution, homogeneity variances | One-way ANOVA, Tukey multiple comparisons test         | F (3, 36) = 18.25                | <p>One-way ANOVA, p&lt;0.0001</p> <p>Tukey's multiple comparisons test:</p> <p>Sham+control vs. Sham+antagomir: p=0.9306<br/> Sham+control vs. TBI+control: p&lt;0.0001<br/> Sham+control vs. TBI+antagomir: p=0.0383<br/> Sham+antagomir vs. TBI+control: p&lt;0.0001<br/> Sham+antagomir vs. TBI+antagomir: p=0.1412<br/> TBI+control vs. TBI+antagomir: p=0.0024</p>                                                                                                                                                                                                                                                                                                                                                                                                                                                                                                                                                                                                                                                                                                                                                                                                                                  |
| 5I     | Sham+control=10<br>Sham+antagomir=10<br>TBI+control=10<br>TBI+antagomir=10 | Normal distribution, homogeneity variances | One-way ANOVA, Tukey multiple comparisons test         | F (3, 36) = 1.243                | <p>One-way ANOVA, p=0.3086</p> <p>Tukey's multiple comparisons test:</p> <p>Sham+control vs. Sham+antagomir: p=0.3278<br/> Sham+control vs. TBI+control: p=0.992<br/> Sham+control vs. TBI+antagomir: p=0.6745<br/> Sham+antagomir vs. TBI+control: p=0.484<br/> Sham+antagomir vs. TBI+antagomir: p=0.9337<br/> TBI+control vs. TBI+antagomir: p=0.8319</p>                                                                                                                                                                                                                                                                                                                                                                                                                                                                                                                                                                                                                                                                                                                                                                                                                                             |
| 5K     | Sham+control=10<br>Sham+antagomir=10<br>TBI+control=10<br>TBI+antagomir=10 | Non-normal distribution                    | Kruskal-Wallis test. Dunn's multiple comparisons test. | Kruskal-Wallis statistic = 22.56 | <p>Kruskal-Wallis test, p&lt;0.0001</p> <p>Dunn's multiple comparisons test:</p> <p>Sham+control vs. Sham+antagomir: p&gt;0.9999<br/> Sham+control vs. TBI+control: p=0.0004<br/> Sham+control vs. TBI+antagomir: p&gt;0.9999<br/> Sham+antagomir vs. TBI+control: p=0.0003<br/> Sham+antagomir vs. TBI+antagomir: p&gt;0.9999<br/> TBI+control vs. TBI+antagomir: p=0.0039</p>                                                                                                                                                                                                                                                                                                                                                                                                                                                                                                                                                                                                                                                                                                                                                                                                                          |
| 5M     | TBI+control=10<br>TBI+antagomir=10                                         | Normal distribution                        | Unpaired t test                                        | t=3.027, df=18                   | TBI+control vs. TBI+antagomir: p=0.0073                                                                                                                                                                                                                                                                                                                                                                                                                                                                                                                                                                                                                                                                                                                                                                                                                                                                                                                                                                                                                                                                                                                                                                  |
| 5O     | Sham+control=6<br>Sham+antagomir=6<br>TBI+control=6<br>TBI+antagomir=6     | Normal distribution                        | One-way ANOVA, Tukey multiple comparisons test         | F (3, 20) = 94.31                | <p>One-way ANOVA, p&lt;0.0001</p> <p>Tukey's multiple comparisons test:</p> <p>Sham+control vs. Sham+antagomir: p=0.9915<br/> Sham+control vs. TBI+control: p&lt;0.0001<br/> Sham+control vs. TBI+antagomir: p&lt;0.0001<br/> Sham+antagomir vs. TBI+control: p&lt;0.0001<br/> Sham+antagomir vs. TBI+antagomir: p&lt;0.0001<br/> TBI+control vs. TBI+antagomir: p&lt;0.0001</p>                                                                                                                                                                                                                                                                                                                                                                                                                                                                                                                                                                                                                                                                                                                                                                                                                         |
| 5P     | Sham+control=6<br>Sham+antagomir=6<br>TBI+control=6<br>TBI+antagomir=6     | Normal distribution, homogeneity variances | One-way ANOVA, Tukey multiple comparisons test         | F (3, 20) = 30.49                | <p>One-way ANOVA, p&lt;0.0001</p> <p>Tukey's multiple comparisons test:</p> <p>Sham+control vs. Sham+antagomir: p=0.9725<br/> Sham+control vs. TBI+control: p&lt;0.0001</p>                                                                                                                                                                                                                                                                                                                                                                                                                                                                                                                                                                                                                                                                                                                                                                                                                                                                                                                                                                                                                              |

| Figure | n                                                                      | Data structure                             | Test used                                      | Statistic         | P value                                                                                                                                                                                                                                                                                                                                        |
|--------|------------------------------------------------------------------------|--------------------------------------------|------------------------------------------------|-------------------|------------------------------------------------------------------------------------------------------------------------------------------------------------------------------------------------------------------------------------------------------------------------------------------------------------------------------------------------|
|        |                                                                        |                                            |                                                |                   | Sham+control vs. TBI+antagomir: p=0.0007<br>Sham+antagomir vs. TBI+control: p<0.0001<br>Sham+antagomir vs. TBI+antagomir: p=0.0003<br>TBI+control vs. TBI+antagomir: p=0.0356                                                                                                                                                                  |
| 5Q     | Sham+control=6<br>Sham+antagomir=6<br>TBI+control=6<br>TBI+antagomir=6 | Normal distribution, homogeneity variances | One-way ANOVA, Tukey multiple comparisons test | F (3, 20) = 1.209 | One-way ANOVA, p= 0.3320<br><br>Tukey's multiple comparisons test:<br><br>Sham+control vs. Sham+antagomir: p=0.9807<br>Sham+control vs. TBI+control: p=0.5685<br>Sham+control vs. TBI+antagomir: p=0.9935<br>Sham+antagomir vs. TBI+control: p=0.3552<br>Sham+antagomir vs. TBI+antagomir: p=0.9994<br>TBI+control vs. TBI+antagomir: p=0.4172 |
| 6C     | Sham+control=6<br>Sham+antagomir=6<br>TBI+control=6<br>TBI+antagomir=6 | Normal distribution, homogeneity variances | One-way ANOVA, Tukey multiple comparisons test | F (3, 20) = 85.56 | One-way ANOVA, p<0.0001<br><br>Tukey's multiple comparisons test:<br><br>Sham+control vs. Sham+antagomir: p=0.7345<br>Sham+control vs. TBI+control: p<0.0001<br>Sham+control vs. TBI+antagomir: p<0.0001<br>Sham+antagomir vs. TBI+control: p<0.0001<br>Sham+antagomir vs. TBI+antagomir: p<0.0001<br>TBI+control vs. TBI+antagomir: p<0.0001  |
| 6D     | Sham+control=6<br>Sham+antagomir=6<br>TBI+control=6<br>TBI+antagomir=6 | Normal distribution, homogeneity variances | One-way ANOVA, Tukey multiple comparisons test | F (3, 20) = 174.5 | One-way ANOVA, p<0.0001<br><br>Tukey's multiple comparisons test:<br><br>Sham+control vs. Sham+antagomir: p=0.9991<br>Sham+control vs. TBI+control: p<0.0001<br>Sham+control vs. TBI+antagomir: p<0.0001<br>Sham+antagomir vs. TBI+control: p<0.0001<br>Sham+antagomir vs. TBI+antagomir: p<0.0001<br>TBI+control vs. TBI+antagomir: p<0.0001  |
| 6E     | Sham+control=6<br>Sham+antagomir=6<br>TBI+control=6<br>TBI+antagomir=6 | Normal distribution, homogeneity variances | One-way ANOVA, Tukey multiple comparisons test | F (3, 20) = 65.39 | One-way ANOVA, p<0.0001<br><br>Tukey's multiple comparisons test:<br><br>Sham+control vs. Sham+antagomir: p=0.9992<br>Sham+control vs. TBI+control: p<0.0001<br>Sham+control vs. TBI+antagomir: p=0.0001<br>Sham+antagomir vs. TBI+control: p<0.0001<br>Sham+antagomir vs. TBI+antagomir: p=0.0001<br>TBI+control vs. TBI+antagomir: p<0.0001  |
| 6G     | Sham+control=6<br>Sham+antagomir=6<br>TBI+control=6<br>TBI+antagomir=6 | Normal distribution, homogeneity variances | One-way ANOVA, Tukey multiple comparisons test | F (3, 20) = 59.54 | One-way ANOVA, p<0.0001<br><br>Tukey's multiple comparisons test:<br><br>Sham+control vs. Sham+antagomir: p=0.7487<br>Sham+control vs. TBI+control: p<0.0001<br>Sham+control vs. TBI+antagomir: p<0.0001<br>Sham+antagomir vs. TBI+control: p<0.0001<br>Sham+antagomir vs. TBI+antagomir: p<0.0001<br>TBI+control vs. TBI+antagomir: p=0.0029  |
| 6H     | Sham+control=6<br>Sham+antagomir=6<br>TBI+control=6<br>TBI+antagomir=6 | Normal distribution, homogeneity variances | One-way ANOVA, Tukey multiple comparisons test | F (3, 20) = 87.53 | One-way ANOVA, p<0.0001<br><br>Tukey's multiple comparisons test:<br><br>Sham+control vs. Sham+antagomir: p=0.8284<br>Sham+control vs. TBI+control: p<0.0001<br>Sham+control vs. TBI+antagomir: p<0.0001<br>Sham+antagomir vs. TBI+control: p<0.0001<br>Sham+antagomir vs. TBI+antagomir: p<0.0001<br>TBI+control vs. TBI+antagomir: p<0.0001  |
| 6I     | Sham+control=6<br>Sham+antagomir=6<br>TBI+control=6<br>TBI+antagomir=6 | Normal distribution                        | One-way ANOVA, Tukey multiple comparisons test | F (3, 20) = 33.79 | One-way ANOVA, p<0.0001<br><br>Tukey's multiple comparisons test:<br><br>Sham+control vs. Sham+antagomir: p=0.9996<br>Sham+control vs. TBI+control: p<0.0001<br>Sham+control vs. TBI+antagomir: p=0.0235<br>Sham+antagomir vs. TBI+control: p<0.0001<br>Sham+antagomir vs. TBI+antagomir: p=0.0292<br>TBI+control vs. TBI+antagomir: p<0.0001  |
| 6J     | Sham+control=6<br>Sham+antagomir=6<br>TBI+control=6<br>TBI+antagomir=6 | Normal distribution, homogeneity variances | One-way ANOVA, Tukey multiple                  | F (3, 20) = 49.58 | One-way ANOVA, p<0.0001<br><br>Tukey's multiple comparisons test:                                                                                                                                                                                                                                                                              |

| Figure | n                                                                      | Data structure                             | Test used                                      | Statistic         | P value                                                                                                                                                                                                                                                                                                                                       |
|--------|------------------------------------------------------------------------|--------------------------------------------|------------------------------------------------|-------------------|-----------------------------------------------------------------------------------------------------------------------------------------------------------------------------------------------------------------------------------------------------------------------------------------------------------------------------------------------|
|        |                                                                        |                                            | comparisons test                               |                   | Sham+control vs. Sham+antagomir: p=0.9989<br>Sham+control vs. TBI+control: p<0.0001<br>Sham+control vs. TBI+antagomir: p<0.0001<br>Sham+antagomir vs. TBI+control: p<0.0001<br>Sham+antagomir vs. TBI+antagomir: p<0.0001<br>TBI+control vs. TBI+antagomir: p=0.001                                                                           |
| 6K     | Sham+control=6<br>Sham+antagomir=6<br>TBI+control=6<br>TBI+antagomir=6 | Normal distribution, homogeneity variances | One-way ANOVA, Tukey multiple comparisons test | F (3, 20) = 9.988 | One-way ANOVA, p<0.0001<br><br>Tukey's multiple comparisons test:<br><br>Sham+control vs. Sham+antagomir: p=0.9997<br>Sham+control vs. TBI+control: p=0.0006<br>Sham+control vs. TBI+antagomir: p=0.539<br>Sham+antagomir vs. TBI+control: p=0.0008<br>Sham+antagomir vs. TBI+antagomir: p=0.5942<br>TBI+control vs. TBI+antagomir: p=0.0133  |
| 6L     | Sham+control=6<br>Sham+antagomir=6<br>TBI+control=6<br>TBI+antagomir=6 | Normal distribution, homogeneity variances | One-way ANOVA, Tukey multiple comparisons test | F (3, 20) = 78.28 | One-way ANOVA, p<0.0001<br><br>Tukey's multiple comparisons test:<br><br>Sham+control vs. Sham+antagomir: p=0.9701<br>Sham+control vs. TBI+control: p<0.0001<br>Sham+control vs. TBI+antagomir: p=0.0285<br>Sham+antagomir vs. TBI+control: p<0.0001<br>Sham+antagomir vs. TBI+antagomir: p=0.071<br>TBI+control vs. TBI+antagomir: p<0.0001  |
| 6N     | Sham+control=6<br>Sham+antagomir=6<br>TBI+control=6<br>TBI+antagomir=6 | Normal distribution, homogeneity variances | One-way ANOVA, Tukey multiple comparisons test | F (3, 20) = 103.7 | One-way ANOVA, p<0.0001<br><br>Tukey's multiple comparisons test:<br><br>Sham+control vs. Sham+antagomir: p=0.6795<br>Sham+control vs. TBI+control: p<0.0001<br>Sham+control vs. TBI+antagomir: p<0.0001<br>Sham+antagomir vs. TBI+control: p<0.0001<br>Sham+antagomir vs. TBI+antagomir: p<0.0001<br>TBI+control vs. TBI+antagomir: p=0.0002 |
| 6O     | Sham+control=6<br>Sham+antagomir=6<br>TBI+control=6<br>TBI+antagomir=6 | Normal distribution, homogeneity variances | One-way ANOVA, Tukey multiple comparisons test | F (3, 20) = 75.36 | One-way ANOVA, p<0.0001<br><br>Tukey's multiple comparisons test:<br><br>Sham+control vs. Sham+antagomir: p=0.915<br>Sham+control vs. TBI+control: p<0.0001<br>Sham+control vs. TBI+antagomir: p<0.0001<br>Sham+antagomir vs. TBI+control: p<0.0001<br>Sham+antagomir vs. TBI+antagomir: p<0.0001<br>TBI+control vs. TBI+antagomir: p<0.0001  |
| 6P     | Sham+control=6<br>Sham+antagomir=6<br>TBI+control=6<br>TBI+antagomir=6 | Normal distribution, homogeneity variances | One-way ANOVA, Tukey multiple comparisons test | F (3, 20) = 3.595 | One-way ANOVA, p=0.0316<br><br>Tukey's multiple comparisons test:<br><br>Sham+control vs. Sham+antagomir: p=0.9999<br>Sham+control vs. TBI+control: p=0.0875<br>Sham+control vs. TBI+antagomir: p=0.1659<br>Sham+antagomir vs. TBI+control: p=0.1001<br>Sham+antagomir vs. TBI+antagomir: p=0.1872<br>TBI+control vs. TBI+antagomir: p=0.9852 |
| 7D     | Sham+control=6<br>Sham+antagomir=6<br>TBI+control=6<br>TBI+antagomir=6 | Normal distribution, homogeneity variances | One-way ANOVA, Tukey multiple comparisons test | F (3, 20) = 137.1 | One-way ANOVA, p<0.0001<br><br>Tukey's multiple comparisons test:<br><br>Sham+control vs. Sham+antagomir: p>0.9999<br>Sham+control vs. TBI+control: p<0.0001<br>Sham+control vs. TBI+antagomir: p<0.0001<br>Sham+antagomir vs. TBI+control: p<0.0001<br>Sham+antagomir vs. TBI+antagomir: p<0.0001<br>TBI+control vs. TBI+antagomir: p<0.0001 |
| 7E     | Sham+control=6<br>Sham+antagomir=6<br>TBI+control=6<br>TBI+antagomir=6 | Normal distribution, homogeneity variances | One-way ANOVA, Tukey multiple comparisons test | F (3, 20) = 161.1 | One-way ANOVA, p<0.0001<br><br>Tukey's multiple comparisons test:<br><br>Sham+control vs. Sham+antagomir: p=0.9315<br>Sham+control vs. TBI+control: p<0.0001<br>Sham+control vs. TBI+antagomir: p<0.0001<br>Sham+antagomir vs. TBI+control: p<0.0001<br>Sham+antagomir vs. TBI+antagomir: p<0.0001<br>TBI+control vs. TBI+antagomir: p<0.0001 |
| 7F     | Sham+control=6<br>Sham+antagomir=6                                     | Normal distribution,                       | One-way ANOVA,                                 | F (3, 20) = 125.3 | One-way ANOVA, p<0.0001                                                                                                                                                                                                                                                                                                                       |

| Figure         | n                                                                      | Data structure                                      | Test used                                                             | Statistic                         | P value                                                                                                                                                                                                                                                                                                                                       |
|----------------|------------------------------------------------------------------------|-----------------------------------------------------|-----------------------------------------------------------------------|-----------------------------------|-----------------------------------------------------------------------------------------------------------------------------------------------------------------------------------------------------------------------------------------------------------------------------------------------------------------------------------------------|
|                | TBI+control=6<br>TBI+antagomir=6                                       | homogeneity<br>variances                            | Tukey<br>multiple<br>comparisons<br>test                              |                                   | Tukey's multiple comparisons test:<br><br>Sham+control vs. Sham+antagomir: p=0.999<br>Sham+control vs. TBI+control: p<0.0001<br>Sham+control vs. TBI+antagomir: p<0.0001<br>Sham+antagomir vs. TBI+control: p<0.0001<br>Sham+antagomir vs. TBI+antagomir: p<0.0001<br>TBI+control vs. TBI+antagomir: p<0.0001                                 |
| 7I             | Sham+control=6<br>Sham+antagomir=6<br>TBI+control=6<br>TBI+antagomir=6 | Normal<br>distribution,<br>homogeneity<br>variances | One-way<br>ANOVA,<br>Tukey<br>multiple<br>comparisons<br>test         | F (3, 20) = 408.1                 | One-way ANOVA, p<0.0001<br><br>Tukey's multiple comparisons test:<br><br>Sham+control vs. Sham+antagomir: p>0.9999<br>Sham+control vs. TBI+control: p<0.0001<br>Sham+control vs. TBI+antagomir: p<0.0001<br>Sham+antagomir vs. TBI+control: p<0.0001<br>Sham+antagomir vs. TBI+antagomir: p<0.0001<br>TBI+control vs. TBI+antagomir: p<0.0001 |
| 7J             | Sham+control=6<br>Sham+antagomir=6<br>TBI+control=6<br>TBI+antagomir=6 | Normal<br>distribution,<br>homogeneity<br>variances | One-way<br>ANOVA,<br>Tukey<br>multiple<br>comparisons<br>test         | F (3, 20) = 173.9                 | One-way ANOVA, p<0.0001<br><br>Tukey's multiple comparisons test:<br><br>Sham+control vs. Sham+antagomir: p>0.9999<br>Sham+control vs. TBI+control: p<0.0001<br>Sham+control vs. TBI+antagomir: p<0.0001<br>Sham+antagomir vs. TBI+control: p<0.0001<br>Sham+antagomir vs. TBI+antagomir: p<0.0001<br>TBI+control vs. TBI+antagomir: p<0.0001 |
| 7M             | Sham+control=6<br>Sham+antagomir=6<br>TBI+control=6<br>TBI+antagomir=6 | Normal<br>distribution,<br>homogeneity<br>variances | One-way<br>ANOVA,<br>Tukey<br>multiple<br>comparisons<br>test         | F (3, 20) = 303.9                 | One-way ANOVA, p<0.0001<br><br>Tukey's multiple comparisons test:<br><br>Sham+control vs. Sham+antagomir: p>0.9999<br>Sham+control vs. TBI+control: p<0.0001<br>Sham+control vs. TBI+antagomir: p<0.0001<br>Sham+antagomir vs. TBI+control: p<0.0001<br>Sham+antagomir vs. TBI+antagomir: p<0.0001<br>TBI+control vs. TBI+antagomir: p<0.0001 |
| 7N             | Sham+control=6<br>Sham+antagomir=6<br>TBI+control=6<br>TBI+antagomir=6 | Normal<br>distribution,<br>homogeneity<br>variances | One-way<br>ANOVA,<br>Tukey<br>multiple<br>comparisons<br>test         | F (3, 20) = 545.1                 | One-way ANOVA, p<0.0001<br><br>Tukey's multiple comparisons test:<br><br>Sham+control vs. Sham+antagomir: p>0.9999<br>Sham+control vs. TBI+control: p<0.0001<br>Sham+control vs. TBI+antagomir: p<0.0001<br>Sham+antagomir vs. TBI+control: p<0.0001<br>Sham+antagomir vs. TBI+antagomir: p<0.0001<br>TBI+control vs. TBI+antagomir: p<0.0001 |
| 8C:<br>BLC     | Sham+WT=4<br>Sham+KO=4<br>TBI+WT=4<br>TBI+KO=4                         | Non-normal<br>distribution                          | Kruskal-<br>Wallis test,<br>Dunn's<br>multiple<br>comparisons<br>test | Kruskal-Wallis<br>statistic=10.92 | Kruskal-Wallis test, p=0.0017<br><br>Dunn's multiple comparisons test:<br><br>Sham+WT vs. Sham+KO: p>0.9999<br>Sham+WT vs. TBI+WT: p=0.0856<br>Sham+WT vs. TBI+KO: p>0.9999<br>Sham+KO vs. TBI+WT: p=0.0109<br>Sham+KO vs. TBI+KO: p=0.7133<br>TBI+WT vs. TBI+KO: p=0.7133                                                                    |
| 8C:<br>CD30L   | Sham+WT=4<br>Sham+KO=4<br>TBI+WT=4<br>TBI+KO=4                         | Normal<br>distribution,<br>homogeneity<br>variances | One-way<br>ANOVA,<br>Tukey<br>multiple<br>comparisons<br>test         | F (3, 12) = 19.71                 | One-way ANOVA, p<0.0001<br><br>Tukey's multiple comparisons test:<br><br>Sham+WT vs. Sham+KO: p=0.9636<br>Sham+WT vs. TBI+WT: p=0.0001<br>Sham+WT vs. TBI+KO: p=0.6262<br>Sham+KO vs. TBI+WT: p=0.0002<br>Sham+KO vs. TBI+KO: p=0.8759<br>TBI+WT vs. TBI+KO: p=0.0006                                                                         |
| 8C:<br>Eotaxin | Sham+WT=4<br>Sham+KO=4<br>TBI+WT=4<br>TBI+KO=4                         | Normal<br>distribution,<br>homogeneity<br>variances | One-way<br>ANOVA,<br>Tukey<br>multiple<br>comparisons<br>test         | F (3, 12) = 14.39                 | One-way ANOVA, p=0.0003<br><br>Tukey's multiple comparisons test:<br><br>Sham+WT vs. Sham+KO: p=0.9104<br>Sham+WT vs. TBI+WT: p=0.0009<br>Sham+WT vs. TBI+KO: p=0.2981<br>Sham+KO vs. TBI+WT: p=0.0003<br>Sham+KO vs. TBI+KO: p=0.1087                                                                                                        |



| Figure               | n                                              | Data structure                                     | Test used                                                     | Statistic                      | P value                                                                                                                                                                                                                                                                         |
|----------------------|------------------------------------------------|----------------------------------------------------|---------------------------------------------------------------|--------------------------------|---------------------------------------------------------------------------------------------------------------------------------------------------------------------------------------------------------------------------------------------------------------------------------|
|                      |                                                |                                                    |                                                               |                                | TBI+WT vs. TBI+KO: p=0.0208                                                                                                                                                                                                                                                     |
| 8C:<br>Eotaxin-2     | Sham+WT=4<br>Sham+KO=4<br>TBI+WT=4<br>TBI+KO=4 | Normal distribution,<br>homogeneity<br>variances   | One-way ANOVA,<br>Tukey multiple comparisons test             | F (3, 12) = 38.59              | One-way ANOVA, p<0.0001<br><br>Tukey's multiple comparisons test:<br><br>Sham+WT vs. Sham+KO: p=0.9985<br>Sham+WT vs. TBI+WT: p<0.0001<br>Sham+WT vs. TBI+KO: p=0.1185<br>Sham+KO vs. TBI+WT: p<0.0001<br>Sham+KO vs. TBI+KO: p=0.1527<br>TBI+WT vs. TBI+KO: p=<0.0001          |
| 8C:<br>Fas ligand    | Sham+WT=4<br>Sham+KO=4<br>TBI+WT=4<br>TBI+KO=4 | Non-normal distribution                            | Kruskal-Wallis test,<br>Dunn's multiple comparisons test      | Kruskal-Wallis statistic=8.890 | Kruskal-Wallis test, p=0.0144<br><br>Dunn's multiple comparisons test:<br><br>Sham+WT vs. Sham+KO: p>0.9999<br>Sham+WT vs. TBI+WT: p=0.1876<br>Sham+WT vs. TBI+KO: p>0.9999<br>Sham+KO vs. TBI+WT: p=0.036<br>Sham+KO vs. TBI+KO: p>0.9999<br>TBI+WT vs. TBI+KO: p=0.1554       |
| 8C:<br>Fractalkine   | Sham+WT=4<br>Sham+KO=4<br>TBI+WT=4<br>TBI+KO=4 | Normal distribution,<br>homogeneity<br>variances   | One-way ANOVA,<br>Tukey multiple comparisons test             | F (3, 12) = 2.470              | One-way ANOVA, p=0.1119<br><br>Tukey's multiple comparisons test:<br><br>Sham+WT vs. Sham+KO: p=0.9998<br>Sham+WT vs. TBI+WT: p=0.2293<br>Sham+WT vs. TBI+KO: p=0.9624<br>Sham+KO vs. TBI+WT: p=0.2575<br>Sham+KO vs. TBI+KO: p=0.9425<br>TBI+WT vs. TBI+KO: p=0.1082           |
| 8C:<br>G-CSF         | Sham+WT=4<br>Sham+KO=4<br>TBI+WT=4<br>TBI+KO=4 | Normal distribution,<br>heterogeneous<br>variances | Welch's ANOVA test,<br>Dunnett's T3 multiple comparisons test | W (3,000, 7.152) = 199.8       | Welch's ANOVA test, p<0.0001<br><br>Dunnett's T3 multiple comparisons test:<br><br>Sham+WT vs. Sham+KO: p=0.1647<br>Sham+WT vs. TBI+WT: p<0.0001<br>Sham+WT vs. TBI+KO: p=0.5025<br>Sham+KO vs. TBI+WT: p<0.0001<br>Sham+KO vs. TBI+KO: p=0.1542<br>TBI+WT vs. TBI+KO: p=0.0049 |
| 8C:<br>GM-CSF        | Sham+WT=4<br>Sham+KO=4<br>TBI+WT=4<br>TBI+KO=4 | Normal distribution,<br>homogeneity<br>variances   | One-way ANOVA,<br>Tukey multiple comparisons test             | F (3, 12) = 23.27              | One-way ANOVA, p<0.0001<br><br>Tukey's multiple comparisons test:<br><br>Sham+WT vs. Sham+KO: p=0.7327<br>Sham+WT vs. TBI+WT: p=0.0001<br>Sham+WT vs. TBI+KO: p=0.5364<br>Sham+KO vs. TBI+WT: p<0.0001<br>Sham+KO vs. TBI+KO: p=0.1277<br>TBI+WT vs. TBI+KO: p=0.001            |
| 8C:<br>IFN- $\gamma$ | Sham+WT=4<br>Sham+KO=4<br>TBI+WT=4<br>TBI+KO=4 | Normal distribution,<br>homogeneity<br>variances   | One-way ANOVA,<br>Tukey multiple comparisons test             | F (3, 12) = 7.198              | One-way ANOVA, p=0.0051<br><br>Tukey's multiple comparisons test:<br><br>Sham+WT vs. Sham+KO: p=0.9986<br>Sham+WT vs. TBI+WT: p=0.0668<br>Sham+WT vs. TBI+KO: p=0.3341<br>Sham+KO vs. TBI+WT: p=0.0511<br>Sham+KO vs. TBI+KO: p=0.4087<br>TBI+WT vs. TBI+KO: p=0.0031           |
| 8C:<br>IL1- $\alpha$ | Sham+WT=4<br>Sham+KO=4<br>TBI+WT=4<br>TBI+KO=4 | Non-normal distribution                            | Kruskal-Wallis test,<br>Dunn's multiple comparisons test      | Kruskal-Wallis statistic=11.93 | Kruskal-Wallis test, p=0.0003<br><br>Dunn's multiple comparisons test:<br><br>Sham+WT vs. Sham+KO: p>0.9999<br>Sham+WT vs. TBI+WT: p=0.0227<br>Sham+WT vs. TBI+KO: p=0.0561<br>Sham+KO vs. TBI+WT: p=0.1876<br>Sham+KO vs. TBI+KO: p=0.3803<br>TBI+WT vs. TBI+KO: p>0.9999      |

| Figure       | n                                              | Data structure                             | Test used                                      | Statistic         | P value                                                                                                                                                                                                                                                               |
|--------------|------------------------------------------------|--------------------------------------------|------------------------------------------------|-------------------|-----------------------------------------------------------------------------------------------------------------------------------------------------------------------------------------------------------------------------------------------------------------------|
| 8D:<br>IL1-β | Sham+WT=4<br>Sham+KO=4<br>TBI+WT=4<br>TBI+KO=4 | Normal distribution, homogeneity variances | One-way ANOVA, Tukey multiple comparisons test | F (3, 12) = 10.51 | One-way ANOVA, p=0.0011<br><br>Tukey's multiple comparisons test:<br><br>Sham+WT vs. Sham+KO: p=0.9972<br>Sham+WT vs. TBI+WT: p=0.002<br>Sham+WT vs. TBI+KO: p=0.9005<br>Sham+KO vs. TBI+WT: p=0.0027<br>Sham+KO vs. TBI+KO: p=0.9599<br>TBI+WT vs. TBI+KO: p=0.0063  |
| 8D:<br>IL2   | Sham+WT=4<br>Sham+KO=4<br>TBI+WT=4<br>TBI+KO=4 | Normal distribution, homogeneity variances | One-way ANOVA, Tukey multiple comparisons test | F (3, 12) = 10.21 | One-way ANOVA, p=0.0013<br><br>Tukey's multiple comparisons test:<br><br>Sham+WT vs. Sham+KO: p=0.9814<br>Sham+WT vs. TBI+WT: p=0.0091<br>Sham+WT vs. TBI+KO: p=0.7034<br>Sham+KO vs. TBI+WT: p=0.0048<br>Sham+KO vs. TBI+KO: p=0.8895<br>TBI+WT vs. TBI+KO: p=0.0014 |
| 8D:<br>IL3   | Sham+WT=4<br>Sham+KO=4<br>TBI+WT=4<br>TBI+KO=4 | Normal distribution, homogeneity variances | One-way ANOVA, Tukey multiple comparisons test | F (3, 12) = 24.45 | One-way ANOVA, p<0.0001<br><br>Tukey's multiple comparisons test:<br><br>Sham+WT vs. Sham+KO: p=0.9555<br>Sham+WT vs. TBI+WT: p<0.0001<br>Sham+WT vs. TBI+KO: p=0.472<br>Sham+KO vs. TBI+WT: p<0.0001<br>Sham+KO vs. TBI+KO: p=0.7618<br>TBI+WT vs. TBI+KO: p=0.0003  |
| 8D:<br>IL4   | Sham+WT=4<br>Sham+KO=4<br>TBI+WT=4<br>TBI+KO=4 | Normal distribution, homogeneity variances | One-way ANOVA, Tukey multiple comparisons test | F (3, 12) = 0.477 | One-way ANOVA, p=.07040<br><br>Tukey's multiple comparisons test:<br><br>Sham+WT vs. Sham+KO: p=0.7105<br>Sham+WT vs. TBI+WT: p=0.9997<br>Sham+WT vs. TBI+KO: p=0.9885<br>Sham+KO vs. TBI+WT: p=0.7598<br>Sham+KO vs. TBI+KO: p=0.8712<br>TBI+WT vs. TBI+KO: p=0.9956 |
| 8D:<br>IL6   | Sham+WT=4<br>Sham+KO=4<br>TBI+WT=4<br>TBI+KO=4 | Normal distribution, homogeneity variances | One-way ANOVA, Tukey multiple comparisons test | F (3, 12) = 16.63 | One-way ANOVA, p=0.0001<br><br>Tukey's multiple comparisons test:<br><br>Sham+WT vs. Sham+KO: p=0.1166<br>Sham+WT vs. TBI+WT: p=0.004<br>Sham+WT vs. TBI+KO: p=0.4598<br>Sham+KO vs. TBI+WT: p<0.0001<br>Sham+KO vs. TBI+KO: p=0.0085<br>TBI+WT vs. TBI+KO: p=0.0552  |
| 8D:<br>IL9   | Sham+WT=4<br>Sham+KO=4<br>TBI+WT=4<br>TBI+KO=4 | Normal distribution, homogeneity variances | One-way ANOVA, Tukey multiple comparisons test | F (3, 12) = 41.07 | One-way ANOVA, p<0.0001<br><br>Tukey's multiple comparisons test:<br><br>Sham+WT vs. Sham+KO: p=0.816<br>Sham+WT vs. TBI+WT: p<0.0001<br>Sham+WT vs. TBI+KO: p=0.0071<br>Sham+KO vs. TBI+WT: p<0.0001<br>Sham+KO vs. TBI+KO: p=0.0016<br>TBI+WT vs. TBI+KO: p=0.0016  |
| 8D:<br>IL10  | Sham+WT=4<br>Sham+KO=4<br>TBI+WT=4<br>TBI+KO=4 | Normal distribution, homogeneity variances | One-way ANOVA, Tukey multiple comparisons test | F (3, 12) = 19.95 | One-way ANOVA, p<0.0001<br><br>Tukey's multiple comparisons test:<br><br>Sham+WT vs. Sham+KO: p=0.2647<br>Sham+WT vs. TBI+WT: p=0.0007<br>Sham+WT vs. TBI+KO: p=0.7422<br>Sham+KO vs. TBI+WT: p<0.0001<br>Sham+KO vs. TBI+KO: p=0.0513<br>TBI+WT vs. TBI+KO: p=0.0035 |

| Figure              | n                                              | Data structure                             | Test used                                             | Statistic                      | P value                                                                                                                                                                                                                                                                    |
|---------------------|------------------------------------------------|--------------------------------------------|-------------------------------------------------------|--------------------------------|----------------------------------------------------------------------------------------------------------------------------------------------------------------------------------------------------------------------------------------------------------------------------|
| 8D:<br>IL12-p40/p70 | Sham+WT=4<br>Sham+KO=4<br>TBI+WT=4<br>TBI+KO=4 | Normal distribution, homogeneity variances | One-way ANOVA, Tukey multiple comparisons test        | F (3, 12) = 16.88              | One-way ANOVA, p=0.0001<br><br>Tukey's multiple comparisons test:<br><br>Sham+WT vs. Sham+KO: p=0.2123<br>Sham+WT vs. TBI+WT: p=0.0024<br>Sham+WT vs. TBI+KO: p=0.9917<br>Sham+KO vs. TBI+WT: p<0.0001<br>Sham+KO vs. TBI+KO: p=0.3186<br>TBI+WT vs. TBI+KO: p=0.0015      |
| 8D:<br>IL12-p70     | Sham+WT=4<br>Sham+KO=4<br>TBI+WT=4<br>TBI+KO=4 | Normal distribution, homogeneity variances | One-way ANOVA, Tukey multiple comparisons test        | F (3, 12) = 1.923              | One-way ANOVA, p=0.1797<br><br>Tukey's multiple comparisons test:<br><br>Sham+WT vs. Sham+KO: p=0.9765<br>Sham+WT vs. TBI+WT: p=0.3465<br>Sham+WT vs. TBI+KO: p=0.7169<br>Sham+KO vs. TBI+WT: p=0.1941<br>Sham+KO vs. TBI+KO: p=0.4843<br>TBI+WT vs. TBI+KO: p=0.904       |
| 8D:<br>IL13         | Sham+WT=4<br>Sham+KO=4<br>TBI+WT=4<br>TBI+KO=4 | Normal distribution, homogeneity variances | One-way ANOVA, Tukey multiple comparisons test        | F (3, 12) = 14.29              | One-way ANOVA, p=0.0003<br><br>Tukey's multiple comparisons test:<br><br>Sham+WT vs. Sham+KO: p=0.9745<br>Sham+WT vs. TBI+WT: p=0.0004<br>Sham+WT vs. TBI+KO: p=0.1627<br>Sham+KO vs. TBI+WT: p=0.0007<br>Sham+KO vs. TBI+KO: p=0.302<br>TBI+WT vs. TBI+KO: p=0.0164       |
| 8E:<br>IL17         | Sham+WT=4<br>Sham+KO=4<br>TBI+WT=4<br>TBI+KO=4 | Non-normal distribution                    | Kruskal-Wallis test, Dunn's multiple comparisons test | Kruskal-Wallis statistic=10.68 | Kruskal-Wallis test, p=0.0023<br><br>Dunn's multiple comparisons test:<br><br>Sham+WT vs. Sham+KO: p=0.8249<br>Sham+WT vs. TBI+WT: p=0.6139<br>Sham+WT vs. TBI+KO: p>0.9999<br>Sham+KO vs. TBI+WT: p=0.0109<br>Sham+KO vs. TBI+KO: p>0.9999<br>TBI+WT vs. TBI+KO: p=0.1049 |
| 8E:<br>I-TAC        | Sham+WT=4<br>Sham+KO=4<br>TBI+WT=4<br>TBI+KO=4 | Non-normal distribution                    | Kruskal-Wallis test, Dunn's multiple comparisons test | Kruskal-Wallis statistic=10.15 | Kruskal-Wallis test, p=0.0041<br><br>Dunn's multiple comparisons test:<br><br>Sham+WT vs. Sham+KO: p>0.9999<br>Sham+WT vs. TBI+WT: p>0.9999<br>Sham+WT vs. TBI+KO: p0.6139<br>Sham+KO vs. TBI+WT: p0.0694<br>Sham+KO vs. TBI+KO: p>0.9999<br>TBI+WT vs. TBI+KO: p=0.0286   |
| 8E:<br>KC           | Sham+WT=4<br>Sham+KO=4<br>TBI+WT=4<br>TBI+KO=4 | Normal distribution, homogeneity variances | One-way ANOVA, Tukey multiple comparisons test        | F (3, 12) = 8.836              | One-way ANOVA, p=0.0023<br><br>Tukey's multiple comparisons test:<br><br>Sham+WT vs. Sham+KO: p=0.38<br>Sham+WT vs. TBI+WT: p=0.0284<br>Sham+WT vs. TBI+KO: p=0.9927<br>Sham+KO vs. TBI+WT: p=0.0016<br>Sham+KO vs. TBI+KO: p=0.5235<br>TBI+WT vs. TBI+KO: p=0.0177        |
| 8E:<br>Leptin       | Sham+WT=4<br>Sham+KO=4<br>TBI+WT=4<br>TBI+KO=4 | Normal distribution, homogeneity variances | One-way ANOVA, Tukey multiple comparisons test        | F (3, 12) = 13.21              | One-way ANOVA, p=0.0004<br><br>Tukey's multiple comparisons test:<br><br>Sham+WT vs. Sham+KO: p=0.3755<br>Sham+WT vs. TBI+WT: p=0.0042<br>Sham+WT vs. TBI+KO: p=0.971<br>Sham+KO vs. TBI+WT: p=0.0003<br>Sham+KO vs. TBI+KO: p=0.2033<br>TBI+WT vs. TBI+KO: p=0.0089       |

| Figure                | n                                              | Data structure                             | Test used                                             | Statistic                      | P value                                                                                                                                                                                                                                                                   |
|-----------------------|------------------------------------------------|--------------------------------------------|-------------------------------------------------------|--------------------------------|---------------------------------------------------------------------------------------------------------------------------------------------------------------------------------------------------------------------------------------------------------------------------|
| 8E:<br>LIX            | Sham+WT=4<br>Sham+KO=4<br>TBI+WT=4<br>TBI+KO=4 | Normal distribution, homogeneity variances | One-way ANOVA, Tukey multiple comparisons test        | F (3, 12) = 11.50              | One-way ANOVA, p=0.0008<br><br>Tukey's multiple comparisons test:<br><br>Sham+WT vs. Sham+KO: p=0.7412<br>Sham+WT vs. TBI+WT: p=0.004<br>Sham+WT vs. TBI+KO: p=0.0023<br>Sham+KO vs. TBI+WT: p=0.0235<br>Sham+KO vs. TBI+KO: p=0.0129<br>TBI+WT vs. TBI+KO: p=0.9858      |
| 8E:<br>Lymphotactin   | Sham+WT=4<br>Sham+KO=4<br>TBI+WT=4<br>TBI+KO=4 | Normal distribution, homogeneity variances | One-way ANOVA, Tukey multiple comparisons test        | F (3, 12) = 7.926              | One-way ANOVA, p=0.0035<br><br>Tukey's multiple comparisons test:<br><br>Sham+WT vs. Sham+KO: p=0.4125<br>Sham+WT vs. TBI+WT: p=0.051<br>Sham+WT vs. TBI+KO: p=0.3626<br>Sham+KO vs. TBI+WT: p=0.0032<br>Sham+KO vs. TBI+KO: p=0.0276<br>TBI+WT vs. TBI+KO: p=0.6082      |
| 8E:<br>MCP-1          | Sham+WT=4<br>Sham+KO=4<br>TBI+WT=4<br>TBI+KO=4 | Non-normal distribution                    | Kruskal-Wallis test, Dunn's multiple comparisons test | Kruskal-Wallis statistic=12.90 | Kruskal-Wallis test, p<0.0001<br><br>Dunn's multiple comparisons test:<br><br>Sham+WT vs. Sham+KO: p>0.9999<br>Sham+WT vs. TBI+WT: p=0.0084<br>Sham+WT vs. TBI+KO: p=0.2697<br>Sham+KO vs. TBI+WT: p=0.036<br>Sham+KO vs. TBI+KO: p=0.7133<br>TBI+WT vs. TBI+KO: p>0.9999 |
| 8E:<br>M-CSF          | Sham+WT=4<br>Sham+KO=4<br>TBI+WT=4<br>TBI+KO=4 | Normal distribution, homogeneity variances | One-way ANOVA, Tukey multiple comparisons test        | F (3, 12) = 5.607              | One-way ANOVA, p=0.0122<br><br>Tukey's multiple comparisons test:<br><br>Sham+WT vs. Sham+KO: p=0.9273<br>Sham+WT vs. TBI+WT: p=0.0301<br>Sham+WT vs. TBI+KO: p=0.0414<br>Sham+KO vs. TBI+WT: p=0.0858<br>Sham+KO vs. TBI+KO: p=0.1163<br>TBI+WT vs. TBI+KO: p=0.9977     |
| 8E:<br>MIG            | Sham+WT=4<br>Sham+KO=4<br>TBI+WT=4<br>TBI+KO=4 | Normal distribution, homogeneity variances | One-way ANOVA, Tukey multiple comparisons test        | F (3, 12) = 7.466              | One-way ANOVA, p=0.0044<br><br>Tukey's multiple comparisons test:<br><br>Sham+WT vs. Sham+KO: p=0.3492<br>Sham+WT vs. TBI+WT: p=0.1042<br>Sham+WT vs. TBI+KO: p=0.5475<br>Sham+KO vs. TBI+WT: p=0.0052<br>Sham+KO vs. TBI+KO: p=0.9807<br>TBI+WT vs. TBI+KO: p=0.01       |
| 8E:<br>MIP-1 $\alpha$ | Sham+WT=4<br>Sham+KO=4<br>TBI+WT=4<br>TBI+KO=4 | Normal distribution, homogeneity variances | One-way ANOVA, Tukey multiple comparisons test        | F (3, 12) = 79.74              | One-way ANOVA, p<0.0001<br><br>Tukey's multiple comparisons test:<br><br>Sham+WT vs. Sham+KO: p=0.0129<br>Sham+WT vs. TBI+WT: p<0.0001<br>Sham+WT vs. TBI+KO: p=0.9375<br>Sham+KO vs. TBI+WT: p<0.0001<br>Sham+KO vs. TBI+KO: p=0.0354<br>TBI+WT vs. TBI+KO: p<0.0001     |
| 8F:<br>MIP-1 $\gamma$ | Sham+WT=4<br>Sham+KO=4<br>TBI+WT=4<br>TBI+KO=4 | Normal distribution, homogeneity variances | One-way ANOVA, Tukey multiple comparisons test        | F (3, 12) = 112.1              | One-way ANOVA, p<0.0001<br><br>Tukey's multiple comparisons test:<br><br>Sham+WT vs. Sham+KO: p=0.3092<br>Sham+WT vs. TBI+WT: p<0.0001<br>Sham+WT vs. TBI+KO: p=0.0017<br>Sham+KO vs. TBI+WT: p<0.0001<br>Sham+KO vs. TBI+KO: p=0.0001<br>TBI+WT vs. TBI+KO: p<0.0001     |
| 8F:<br>RANTES         | Sham+WT=4<br>Sham+KO=4                         | Normal distribution,                       | One-way ANOVA,                                        | F (3, 12) = 6.697              | One-way ANOVA, p=0.0066                                                                                                                                                                                                                                                   |

| Figure               | n                                              | Data structure                                      | Test used                                                     | Statistic         | P value                                                                                                                                                                                                                                                               |
|----------------------|------------------------------------------------|-----------------------------------------------------|---------------------------------------------------------------|-------------------|-----------------------------------------------------------------------------------------------------------------------------------------------------------------------------------------------------------------------------------------------------------------------|
|                      | TBI+WT=4<br>TBI+KO=4                           | homogeneity<br>variances                            | Tukey<br>multiple<br>comparisons<br>test                      |                   | Tukey's multiple comparisons test:<br><br>Sham+WT vs. Sham+KO: p=0.9341<br>Sham+WT vs. TBI+WT: p=0.019<br>Sham+WT vs. TBI+KO: p=0.5016<br>Sham+KO vs. TBI+WT: p=0.0068<br>Sham+KO vs. TBI+KO: p=0.2327<br>TBI+WT vs. TBI+KO: p=0.2121                                 |
| 8F:<br>SDF-1         | Sham+WT=4<br>Sham+KO=4<br>TBI+WT=4<br>TBI+KO=4 | Normal<br>distribution,<br>homogeneity<br>variances | One-way<br>ANOVA,<br>Tukey<br>multiple<br>comparisons<br>test | F (3, 12) = 11.50 | One-way ANOVA, p=0.0008<br><br>Tukey's multiple comparisons test:<br><br>Sham+WT vs. Sham+KO: p=0.324<br>Sham+WT vs. TBI+WT: p=0.0092<br>Sham+WT vs. TBI+KO: p=0.9811<br>Sham+KO vs. TBI+WT: p=0.0005<br>Sham+KO vs. TBI+KO: p=0.188<br>TBI+WT vs. TBI+KO: p=0.0178   |
| 8F:<br>TCA-3         | Sham+WT=4<br>Sham+KO=4<br>TBI+WT=4<br>TBI+KO=4 | Normal<br>distribution,<br>homogeneity<br>variances | One-way<br>ANOVA,<br>Tukey<br>multiple<br>comparisons<br>test | F (3, 12) = 5.317 | One-way ANOVA, p=0.0146<br><br>Tukey's multiple comparisons test:<br><br>Sham+WT vs. Sham+KO: p=0.6914<br>Sham+WT vs. TBI+WT: p=0.0708<br>Sham+WT vs. TBI+KO: p=0.0158<br>Sham+KO vs. TBI+WT: p=0.3856<br>Sham+KO vs. TBI+KO: p=0.1067<br>TBI+WT vs. TBI+KO: p=0.8233 |
| 8F:<br>TECK          | Sham+WT=4<br>Sham+KO=4<br>TBI+WT=4<br>TBI+KO=4 | Normal<br>distribution,<br>homogeneity<br>variances | One-way<br>ANOVA,<br>Tukey<br>multiple<br>comparisons<br>test | F (3, 12) = 8.113 | One-way ANOVA, p=0.0032<br><br>Tukey's multiple comparisons test:<br><br>Sham+WT vs. Sham+KO: p=0.7941<br>Sham+WT vs. TBI+WT: p=0.0131<br>Sham+WT vs. TBI+KO: p=0.8501<br>Sham+KO vs. TBI+WT: p=0.0027<br>Sham+KO vs. TBI+KO: p=0.3521<br>TBI+WT vs. TBI+KO: p=0.0537 |
| 8F:<br>TIMP1         | Sham+WT=4<br>Sham+KO=4<br>TBI+WT=4<br>TBI+KO=4 | Normal<br>distribution,<br>homogeneity<br>variances | One-way<br>ANOVA,<br>Tukey<br>multiple<br>comparisons<br>test | F (3, 12) = 2.161 | One-way ANOVA, p=0.1457<br><br>Tukey's multiple comparisons test:<br><br>Sham+WT vs. Sham+KO: p=0.1119<br>Sham+WT vs. TBI+WT: p=0.8533<br>Sham+WT vs. TBI+KO: p=0.7329<br>Sham+KO vs. TBI+WT: p=0.3687<br>Sham+KO vs. TBI+KO: p=0.4907<br>TBI+WT vs. TBI+KO: p=0.9951 |
| 8F:<br>TIMP2         | Sham+WT=4<br>Sham+KO=4<br>TBI+WT=4<br>TBI+KO=4 | Normal<br>distribution,<br>homogeneity<br>variances | One-way<br>ANOVA,<br>Tukey<br>multiple<br>comparisons<br>test | F (3, 12) = 4.244 | One-way ANOVA, p=0.0292<br><br>Tukey's multiple comparisons test:<br><br>Sham+WT vs. Sham+KO: p=0.2421<br>Sham+WT vs. TBI+WT: p=0.5645<br>Sham+WT vs. TBI+KO: p=0.618<br>Sham+KO vs. TBI+WT: p=0.0269<br>Sham+KO vs. TBI+KO: p=0.8697<br>TBI+WT vs. TBI+KO: p=0.0998  |
| 8F:<br>TNF- $\alpha$ | Sham+WT=4<br>Sham+KO=4<br>TBI+WT=4<br>TBI+KO=4 | Normal<br>distribution,<br>homogeneity<br>variances | One-way<br>ANOVA,<br>Tukey<br>multiple<br>comparisons<br>test | F (3, 12) = 6.464 | One-way ANOVA, p=0.0075<br><br>Tukey's multiple comparisons test:<br><br>Sham+WT vs. Sham+KO: p=0.5246<br>Sham+WT vs. TBI+WT: p=0.0614<br>Sham+WT vs. TBI+KO: p=0.9979<br>Sham+KO vs. TBI+WT: p=0.0054<br>Sham+KO vs. TBI+KO: p=0.6277<br>TBI+WT vs. TBI+KO: p=0.0452 |
| 8F:<br>sTNF RI       | Sham+WT=4<br>Sham+KO=4<br>TBI+WT=4             | Normal<br>distribution,<br>homogeneity              | One-way<br>ANOVA,<br>Tukey                                    | F (3, 12) = 10.38 | One-way ANOVA, p=0.0012<br><br>Tukey's multiple comparisons test:                                                                                                                                                                                                     |

| Figure          | n                                                                      | Data structure                             | Test used                                      | Statistic         | P value                                                                                                                                                                                                                                                                                                                                         |
|-----------------|------------------------------------------------------------------------|--------------------------------------------|------------------------------------------------|-------------------|-------------------------------------------------------------------------------------------------------------------------------------------------------------------------------------------------------------------------------------------------------------------------------------------------------------------------------------------------|
|                 | TBI+KO=4                                                               | variances                                  | multiple comparisons test                      |                   | Sham+WT vs. Sham+KO: p=0.9965<br>Sham+WT vs. TBI+WT: p=0.0024<br>Sham+WT vs. TBI+KO: p=0.0477<br>Sham+KO vs. TBI+WT: p=0.0035<br>Sham+KO vs. TBI+KO: p=0.0685<br>TBI+WT vs. TBI+KO: p=0.3566                                                                                                                                                    |
| 8F: sTNF RII    | Sham+WT=4<br>Sham+KO=4<br>TBI+WT=4<br>TBI+KO=4                         | Normal distribution, homogeneity variances | One-way ANOVA, Tukey multiple comparisons test | F (3, 12) = 27.06 | One-way ANOVA, p<0.0001<br><br>Tukey's multiple comparisons test:<br><br>Sham+WT vs. Sham+KO: p=0.9968<br>Sham+WT vs. TBI+WT: p<0.0001<br>Sham+WT vs. TBI+KO: p=0.209<br>Sham+KO vs. TBI+WT: p<0.0001<br>Sham+KO vs. TBI+KO: p=0.2815<br>TBI+WT vs. TBI+KO: p=0.0004                                                                            |
| 8I: BLC         | Sham+control=4<br>Sham+antagomir=4<br>TBI+control=4<br>TBI+antagomir=4 | Normal distribution, homogeneity variances | One-way ANOVA, Tukey multiple comparisons test | F (3, 12) = 13.93 | One-way ANOVA, p=0.0003<br><br>Tukey's multiple comparisons test:<br><br>Sham+control vs. Sham+antagomir: p=0.9928<br>Sham+control vs. TBI+control T: p=0.0033<br>Sham+control vs. TBI+antagomir: p=0.4738<br>Sham+antagomir vs. TBI+control: p=0.0021<br>Sham+antagomir vs. TBI+antagomir: p=0.6279<br>TBI+control vs. TBI+antagomir: p=0.0003 |
| 8I: CD30L       | Sham+control=4<br>Sham+antagomir=4<br>TBI+control=4<br>TBI+antagomir=4 | Normal distribution, homogeneity variances | One-way ANOVA, Tukey multiple comparisons test | F (3, 12) = 7.541 | One-way ANOVA, p=0.0043<br><br>Tukey's multiple comparisons test:<br><br>Sham+control vs. Sham+antagomir: p=0.991<br>Sham+control vs. TBI+control: p=0.3725<br>Sham+control vs. TBI+antagomir: p=0.0469<br>Sham+antagomir vs. TBI+control: p=0.2501<br>Sham+antagomir vs. TBI+antagomir: p=0.077<br>TBI+control vs. TBI+antagomir: p=0.0025     |
| 8I: Eotaxin     | Sham+control=4<br>Sham+antagomir=4<br>TBI+control=4<br>TBI+antagomir=4 | Normal distribution, homogeneity variances | One-way ANOVA, Tukey multiple comparisons test | F (3, 12) = 3.360 | One-way ANOVA, p=0.0551<br><br>Tukey's multiple comparisons test:<br><br>Sham+control vs. Sham+antagomir: p=0.9896<br>Sham+control vs. TBI+control: p=0.1015<br>Sham+control vs. TBI+antagomir: p=0.9842<br>Sham+antagomir vs. TBI+control: p=0.0606<br>Sham+antagomir vs. TBI+antagomir: p=0.9105<br>TBI+control vs. TBI+antagomir: p=0.1788   |
| 8I: Eotaxin-2   | Sham+control=4<br>Sham+antagomir=4<br>TBI+control=4<br>TBI+antagomir=4 | Normal distribution, homogeneity variances | One-way ANOVA, Tukey multiple comparisons test | F (3, 12) = 9.033 | One-way ANOVA, p=0.0021<br><br>Tukey's multiple comparisons test:<br><br>Sham+control vs. Sham+antagomir: p=0.7478<br>Sham+control vs. TBI+control: p=0.0095<br>Sham+control vs. TBI+antagomir: p=0.7307<br>Sham+antagomir vs. TBI+control: p=0.0017<br>Sham+antagomir vs. TBI+antagomir: p=0.2249<br>TBI+control vs. TBI+antagomir: p=0.0584   |
| 8I: Fas ligand  | Sham+control=4<br>Sham+antagomir=4<br>TBI+control=4<br>TBI+antagomir=4 | Normal distribution, homogeneity variances | One-way ANOVA, Tukey multiple comparisons test | F (3, 12) = 2.171 | One-way ANOVA, p=0.1445<br><br>Tukey's multiple comparisons test:<br><br>Sham+control vs. Sham+antagomir: p=0.9981<br>Sham+control vs. TBI+control: p=0.1551<br>Sham+control vs. TBI+antagomir: p=0.8095<br>Sham+antagomir vs. TBI+control: p=0.2024<br>Sham+antagomir vs. TBI+antagomir: p=0.8876<br>TBI+control vs. TBI+antagomir: p=0.5236   |
| 8I: Fractalkine | Sham+control=4<br>Sham+antagomir=4<br>TBI+control=4<br>TBI+antagomir=4 | Normal distribution, homogeneity variances | One-way ANOVA, Tukey multiple                  | F (3, 12) = 5.097 | One-way ANOVA, p=0.0167<br><br>Tukey's multiple comparisons test:                                                                                                                                                                                                                                                                               |

| Figure            | n                                                                      | Data structure                             | Test used                                        | Statistic                      | P value                                                                                                                                                                                                                                                                                                                                       |
|-------------------|------------------------------------------------------------------------|--------------------------------------------|--------------------------------------------------|--------------------------------|-----------------------------------------------------------------------------------------------------------------------------------------------------------------------------------------------------------------------------------------------------------------------------------------------------------------------------------------------|
|                   |                                                                        |                                            | comparisons test                                 |                                | Sham+control vs. Sham+antagomir: p=0.9972<br>Sham+control vs. TBI+control: p=0.5078<br>Sham+control vs. TBI+antagomir: p=0.1225<br>Sham+antagomir vs. TBI+control: p=0.4036<br>Sham+antagomir vs. TBI+antagomir: p=0.1673<br>TBI+control vs. TBI+antagomir: p=0.0105                                                                          |
| 8I: G-CSF         | Sham+control=4<br>Sham+antagomir=4<br>TBI+control=4<br>TBI+antagomir=4 | Normal distribution, homogeneity variances | One-way ANOVA, Tukey multiple comparisons test   | F (3, 12) = 13.15              | One-way ANOVA, p=0.0004<br><br>Tukey's multiple comparisons test:<br><br>Sham+control vs. Sham+antagomir: p=0.7322<br>Sham+control vs. TBI+control: p=0.0021<br>Sham+control vs. TBI+antagomir: p=0.9413<br>Sham+antagomir vs. TBI+control: p=0.0004<br>Sham+antagomir vs. TBI+antagomir: p=0.4151<br>TBI+control vs. TBI+antagomir: p=0.0055 |
| 8I: GM-CSF        | Sham+control=4<br>Sham+antagomir=4<br>TBI+control=4<br>TBI+antagomir=4 | Normal distribution, homogeneity variances | One-way ANOVA, Tukey multiple comparisons test   | F (3, 12) = 22.50              | One-way ANOVA, p<0.0001<br><br>Tukey's multiple comparisons test:<br><br>Sham+control vs. Sham+antagomir: p=0.7734<br>Sham+control vs. TBI+control: p=0.0004<br>Sham+control vs. TBI+antagomir: p=0.6526<br>Sham+antagomir vs. TBI+control: p<0.0001<br>Sham+antagomir vs. TBI+antagomir: p=0.9963<br>TBI+control vs. TBI+antagomir: p<0.0001 |
| 8I: IFN- $\gamma$ | Sham+control=4<br>Sham+antagomir=4<br>TBI+control=4<br>TBI+antagomir=4 | Normal distribution, homogeneity variances | One-way ANOVA, Tukey multiple comparisons test   | F (3, 12) = 15.99              | One-way ANOVA, p=0.0002<br><br>Tukey's multiple comparisons test:<br><br>Sham+control vs. Sham+antagomir: p=0.7499<br>Sham+control vs. TBI+control: p=0.0008<br>Sham+control vs. TBI+antagomir: p=0.8415<br>Sham+antagomir vs. TBI+control: p=0.0002<br>Sham+antagomir vs. TBI+antagomir: p=0.3071<br>TBI+control vs. TBI+antagomir: p=0.0031 |
| 8I: IL1- $\alpha$ | Sham+control=4<br>Sham+antagomir=4<br>TBI+control=4<br>TBI+antagomir=4 | Normal distribution, homogeneity variances | One-way ANOVA, Tukey multiple comparisons test   | F (3, 12) = 9.266              | One-way ANOVA, p=0.0019<br><br>Tukey's multiple comparisons test:<br><br>Sham+control vs. Sham+antagomir: p=0.9394<br>Sham+control vs. TBI+control: p=0.0054<br>Sham+control vs. TBI+antagomir: p=0.7395<br>Sham+antagomir vs. TBI+control: p=0.002<br>Sham+antagomir vs. TBI+antagomir: p=0.4184<br>TBI+control vs. TBI+antagomir: p=0.032   |
| 8J: IL1- $\beta$  | Sham+control=4<br>Sham+antagomir=4<br>TBI+control=4<br>TBI+antagomir=4 | Normal distribution, homogeneity variances | One-way ANOVA, Tukey multiple comparisons test   | F (3, 12) = 28.52              | One-way ANOVA, p<0.0001<br><br>Tukey's multiple comparisons test:<br><br>Sham+control vs. Sham+antagomir: p=0.5874<br>Sham+control vs. TBI+control: p<0.0001<br>Sham+control vs. TBI+antagomir: p=0.412<br>Sham+antagomir vs. TBI+control: p<0.0001<br>Sham+antagomir vs. TBI+antagomir: p=0.057<br>TBI+control vs. TBI+antagomir: p=0.0005   |
| 8J: IL2           | Sham+control=4<br>Sham+antagomir=4<br>TBI+control=4<br>TBI+antagomir=4 | Normal distribution, homogeneity variances | One-way ANOVA, Tukey multiple comparisons test   | F (3, 12) = 11.59              | One-way ANOVA, p=0.0007<br><br>Tukey's multiple comparisons test:<br><br>Sham+control vs. Sham+antagomir: p=0.9928<br>Sham+control vs. TBI+control: p=0.0027<br>Sham+control vs. TBI+antagomir: p=0.9983<br>Sham+antagomir vs. TBI+control: p=0.0017<br>Sham+antagomir vs. TBI+antagomir: p=0.9996<br>TBI+control vs. TBI+antagomir: p=0.002  |
| 8J: IL3           | Sham+control=4<br>Sham+antagomir=4<br>TBI+control=4<br>TBI+antagomir=4 | Non-normal distribution                    | Kruskal-Wallis test, Dunn's multiple comparisons | Kruskal-Wallis statistic=10.68 | Kruskal-Wallis test, p=0.0023<br><br>Dunn's multiple comparisons test:<br><br>Sham+control vs. Sham+antagomir: p>0.9999                                                                                                                                                                                                                       |

| Figure              | n                                                                      | Data structure                             | Test used                                             | Statistic                     | P value                                                                                                                                                                                                                                                                                                                                            |
|---------------------|------------------------------------------------------------------------|--------------------------------------------|-------------------------------------------------------|-------------------------------|----------------------------------------------------------------------------------------------------------------------------------------------------------------------------------------------------------------------------------------------------------------------------------------------------------------------------------------------------|
|                     |                                                                        |                                            | test                                                  |                               | Sham+control vs. TBI+control: p=0.1049<br>Sham+control vs. TBI+antagomir: p>0.9999<br>Sham+antagomir vs. TBI+control: p=0.0109<br>Sham+antagomir vs. TBI+antagomir: p=0.8249<br>TBI+control vs. TBI+antagomir: p=0.6139                                                                                                                            |
| 8J:<br>IL4          | Sham+control=4<br>Sham+antagomir=4<br>TBI+control=4<br>TBI+antagomir=4 | Normal distribution, homogeneity variances | One-way ANOVA, Tukey multiple comparisons test        | F (3, 12) = 2.707             | One-way ANOVA, p=0.0920<br><br>Tukey's multiple comparisons test:<br><br>Sham+control vs. Sham+antagomir: p=0.9326<br>Sham+control vs. TBI+control: p=0.1187<br>Sham+control vs. TBI+antagomir: p=0.23<br>Sham+antagomir vs. TBI+control: p=0.2928<br>Sham+antagomir vs. TBI+antagomir: p=0.5<br>TBI+control vs. TBI+antagomir: p=0.9733           |
| 8J:<br>IL6          | Sham+control=4<br>Sham+antagomir=4<br>TBI+control=4<br>TBI+antagomir=4 | Normal distribution, homogeneity variances | One-way ANOVA, Tukey multiple comparisons test        | F (3, 12) = 17.61             | One-way ANOVA, p=0.0001<br><br>Tukey's multiple comparisons test:<br><br>Sham+control vs. Sham+antagomir: p=0.9401<br>Sham+control vs. TBI+control: p=0.0004<br>Sham+control vs. TBI+antagomir: p=0.8561<br>Sham+antagomir vs. TBI+control: p=0.0002<br>Sham+antagomir vs. TBI+antagomir: p=0.5453<br>TBI+control vs. TBI+antagomir: p=0.0013      |
| 8J:<br>IL9          | Sham+control=4<br>Sham+antagomir=4<br>TBI+control=4<br>TBI+antagomir=4 | Non-normal distribution                    | Kruskal-Wallis test, Dunn's multiple comparisons test | Kruskal-Wallis statistic=7.16 | Kruskal-Wallis test, p=0.0524<br><br>Dunn's multiple comparisons test:<br><br>Sham+control vs. Sham+antagomir: p>0.9999<br>Sham+control vs. TBI+control: p=0.6139<br>Sham+control vs. TBI+antagomir: p>0.9999<br>Sham+antagomir vs. TBI+control: p=0.1876<br>Sham+antagomir vs. TBI+antagomir: p>0.9999<br>TBI+control vs. TBI+antagomir: p=0.0856 |
| 8J:<br>IL10         | Sham+control=4<br>Sham+antagomir=4<br>TBI+control=4<br>TBI+antagomir=4 | Normal distribution, homogeneity variances | One-way ANOVA, Tukey multiple comparisons test        | F (3, 12) = 35.79             | One-way ANOVA, p<0.0001<br><br>Tukey's multiple comparisons test:<br><br>Sham+control vs. Sham+antagomir: p=0.9211<br>Sham+control vs. TBI+control: p<0.0001<br>Sham+control vs. TBI+antagomir: p=0.0901<br>Sham+antagomir vs. TBI+control: p<0.0001<br>Sham+antagomir vs. TBI+antagomir: p=0.0306<br>TBI+control vs. TBI+antagomir: p=0.0003      |
| 8J:<br>IL12-p40/p70 | Sham+control=4<br>Sham+antagomir=4<br>TBI+control=4<br>TBI+antagomir=4 | Normal distribution, homogeneity variances | One-way ANOVA, Tukey multiple comparisons test        | F (3, 12) = 14.27             | One-way ANOVA, p=0.0003<br><br>Tukey's multiple comparisons test:<br><br>Sham+control vs. Sham+antagomir: p=0.9993<br>Sham+control vs. TBI+control: p=0.0006<br>Sham+control vs. TBI+antagomir: p=0.3692<br>Sham+antagomir vs. TBI+control: p=0.0005<br>Sham+antagomir vs. TBI+antagomir: p=0.314<br>TBI+control vs. TBI+antagomir: p=0.0096       |
| 8J:<br>IL12-p70     | Sham+control=4<br>Sham+antagomir=4<br>TBI+control=4<br>TBI+antagomir=4 | Normal distribution, homogeneity variances | One-way ANOVA, Tukey multiple comparisons test        | F (3, 12) = 6.351             | One-way ANOVA, p=0.0080<br><br>Tukey's multiple comparisons test:<br><br>Sham+control vs. Sham+antagomir: p=0.9666<br>Sham+control vs. TBI+control: p=0.0213<br>Sham+control vs. TBI+antagomir: p=0.3682<br>Sham+antagomir vs. TBI+control: p=0.0096<br>Sham+antagomir vs. TBI+antagomir: p=0.192<br>TBI+control vs. TBI+antagomir: p=0.336        |
| 8J:<br>IL13         | Sham+control=4<br>Sham+antagomir=4<br>TBI+control=4<br>TBI+antagomir=4 | Normal distribution, homogeneity variances | One-way ANOVA, Tukey multiple comparisons test        | F (3, 12) = 20.07             | One-way ANOVA, p<0.0001<br><br>Tukey's multiple comparisons test:<br><br>Sham+control vs. Sham+antagomir: p=0.836<br>Sham+control vs. TBI+control: p=0.0004                                                                                                                                                                                        |



| Figure              | n                                                                      | Data structure                             | Test used                                             | Statistic                     | P value                                                                                                                                                                                                                                                                                                                                           |
|---------------------|------------------------------------------------------------------------|--------------------------------------------|-------------------------------------------------------|-------------------------------|---------------------------------------------------------------------------------------------------------------------------------------------------------------------------------------------------------------------------------------------------------------------------------------------------------------------------------------------------|
|                     |                                                                        |                                            |                                                       |                               | Sham+control vs. TBI+antagomir: p=0.9441<br>Sham+antagomir vs. TBI+control: p=0.0001<br>Sham+antagomir vs. TBI+antagomir: p=0.9915<br>TBI+control vs. TBI+antagomir: p=0.0002                                                                                                                                                                     |
| 8K:<br>IL17         | Sham+control=4<br>Sham+antagomir=4<br>TBI+control=4<br>TBI+antagomir=4 | Normal distribution, homogeneity variances | One-way ANOVA, Tukey multiple comparisons test        | F (3, 12) = 28.66             | One-way ANOVA, p<0.0001<br><br>Tukey's multiple comparisons test:<br><br>Sham+control vs. Sham+antagomir: p=0.9913<br>Sham+control vs. TBI+control: p<0.0001<br>Sham+control vs. TBI+antagomir: p=0.841<br>Sham+antagomir vs. TBI+control: p<0.0001<br>Sham+antagomir vs. TBI+antagomir: p=0.6884<br>TBI+control vs. TBI+antagomir: p<0.0001      |
| 8K:<br>I-TAC        | Sham+control=4<br>Sham+antagomir=4<br>TBI+control=4<br>TBI+antagomir=4 | Normal distribution, homogeneity variances | One-way ANOVA, Tukey multiple comparisons test        | F (3, 12) = 20.76             | One-way ANOVA, p<0.0001<br><br>Tukey's multiple comparisons test:<br><br>Sham+control vs. Sham+antagomir: p=0.9995<br>Sham+control vs. TBI+control: p=0.0001<br>Sham+control vs. TBI+antagomir: p=0.4452<br>Sham+antagomir vs. TBI+control: p<0.0001<br>Sham+antagomir vs. TBI+antagomir: p=0.3887<br>TBI+control vs. TBI+antagomir: p=0.0011     |
| 8K:<br>KC           | Sham+control=4<br>Sham+antagomir=4<br>TBI+control=4<br>TBI+antagomir=4 | Normal distribution, homogeneity variances | One-way ANOVA, Tukey multiple comparisons test        | F (3, 12) = 16.38             | One-way ANOVA, p=0.0002<br><br>Tukey's multiple comparisons test:<br><br>Sham+control vs. Sham+antagomir: p=0.9998<br>Sham+control vs. TBI+control: p=0.0006<br>Sham+control vs. TBI+antagomir: p=0.9698<br>Sham+antagomir vs. TBI+control: p=0.0006<br>Sham+antagomir vs. TBI+antagomir: p=0.9828<br>TBI+control vs. TBI+antagomir: p=0.0003     |
| 8K:<br>Leptin       | Sham+control=4<br>Sham+antagomir=4<br>TBI+control=4<br>TBI+antagomir=4 | Normal distribution, homogeneity variances | One-way ANOVA, Tukey multiple comparisons test        | F (3, 12) = 27.79             | One-way ANOVA, p<0.0001<br><br>Tukey's multiple comparisons test:<br><br>Sham+control vs. Sham+antagomir: p=0.9976<br>Sham+control vs. TBI+control: p<0.0001<br>Sham+control vs. TBI+antagomir: p=0.2706<br>Sham+antagomir vs. TBI+control: p<0.0001<br>Sham+antagomir vs. TBI+antagomir: p=0.206<br>TBI+control vs. TBI+antagomir: p=0.0004      |
| 8K:<br>LIX          | Sham+control=4<br>Sham+antagomir=4<br>TBI+control=4<br>TBI+antagomir=4 | Non-normal distribution                    | Kruskal-Wallis test, Dunn's multiple comparisons test | Kruskal-Wallis statistic=8.49 | Kruskal-Wallis test, p=0.0208<br><br>Dunn's multiple comparisons test:<br><br>Sham+control vs. Sham+antagomir: p>0.9999<br>Sham+control vs. TBI+control: p=0.036<br>Sham+control vs. TBI+antagomir: p=0.9495<br>Sham+antagomir vs. TBI+control: p=0.1876<br>Sham+antagomir vs. TBI+antagomir: p>0.9999<br>TBI+control vs. TBI+antagomir: p>0.9999 |
| 8K:<br>Lymphotactin | Sham+control=4<br>Sham+antagomir=4<br>TBI+control=4<br>TBI+antagomir=4 | Normal distribution, homogeneity variances | One-way ANOVA, Tukey multiple comparisons test        | F (3, 12) = 7.922             | One-way ANOVA, p=0.0035<br><br>Tukey's multiple comparisons test:<br><br>Sham+control vs. Sham+antagomir: p=0.9685<br>Sham+control vs. TBI+control: p=0.0126<br>Sham+control vs. TBI+antagomir: p=0.9985<br>Sham+antagomir vs. TBI+control: p=0.0058<br>Sham+antagomir vs. TBI+antagomir: p=0.9911<br>TBI+control vs. TBI+antagomir: p=0.0095     |
| 8K:<br>MCP-1        | Sham+control=4<br>Sham+antagomir=4<br>TBI+control=4<br>TBI+antagomir=4 | Normal distribution, homogeneity variances | One-way ANOVA, Tukey multiple comparisons test        | F (3, 12) = 6.168             | One-way ANOVA, p=0.0088<br><br>Tukey's multiple comparisons test:<br><br>Sham+control vs. Sham+antagomir: p=0.9994<br>Sham+control vs. TBI+control: p=0.0184<br>Sham+control vs. TBI+antagomir: p=0.9952                                                                                                                                          |

| Figure                | n                                                                      | Data structure                                   | Test used                                         | Statistic         | P value                                                                                                                                                                                                                                                                                                                                        |
|-----------------------|------------------------------------------------------------------------|--------------------------------------------------|---------------------------------------------------|-------------------|------------------------------------------------------------------------------------------------------------------------------------------------------------------------------------------------------------------------------------------------------------------------------------------------------------------------------------------------|
|                       |                                                                        |                                                  |                                                   |                   | Sham+antagomir vs. TBI+control: p=0.0151<br>Sham+antagomir vs. TBI+antagomir: p=0.9848<br>TBI+control vs. TBI+antagomir: p=0.0278                                                                                                                                                                                                              |
| 8K:<br>M-CSF          | Sham+control=4<br>Sham+antagomir=4<br>TBI+control=4<br>TBI+antagomir=4 | Normal distribution,<br>homogeneity<br>variances | One-way ANOVA,<br>Tukey multiple comparisons test | F (3, 12) = 7.621 | One-way ANOVA, p=0.0041<br><br>Tukey's multiple comparisons test:<br><br>Sham+control vs. Sham+antagomir: p=0.9452<br>Sham+control vs. TBI+control: p=0.0043<br>Sham+control vs. TBI+antagomir: p=0.2954<br>Sham+antagomir vs. TBI+control: p=0.011<br>Sham+antagomir vs. TBI+antagomir: p=0.5747<br>TBI+control vs. TBI+antagomir: p=0.1062   |
| 8K:<br>MIG            | Sham+control=4<br>Sham+antagomir=4<br>TBI+control=4<br>TBI+antagomir=4 | Normal distribution,<br>homogeneity<br>variances | One-way ANOVA,<br>Tukey multiple comparisons test | F (3, 12) = 10.10 | One-way ANOVA, p=0.0013<br><br>Tukey's multiple comparisons test:<br><br>Sham+control vs. Sham+antagomir: p=0.9668<br>Sham+control vs. TBI+control: p=0.0046<br>Sham+control vs. TBI+antagomir: p=0.106<br>Sham+antagomir vs. TBI+control: p=0.0021<br>Sham+antagomir vs. TBI+antagomir: p=0.0488<br>TBI+control vs. TBI+antagomir: p=0.3145   |
| 8K:<br>MIP-1 $\alpha$ | Sham+control=4<br>Sham+antagomir=4<br>TBI+control=4<br>TBI+antagomir=4 | Normal distribution,<br>homogeneity<br>variances | One-way ANOVA,<br>Tukey multiple comparisons test | F (3, 12) = 6.304 | One-way ANOVA, p=0.0082<br><br>Tukey's multiple comparisons test:<br><br>Sham+control vs. Sham+antagomir: p>0.9999<br>Sham+control vs. TBI+control: p=0.0133<br>Sham+control vs. TBI+antagomir: p=0.9103<br>Sham+antagomir vs. TBI+control: p=0.0139<br>Sham+antagomir vs. TBI+antagomir: p=0.9182<br>TBI+control vs. TBI+antagomir: p=0.0423  |
| 8L:<br>MIP-1 $\gamma$ | Sham+control=4<br>Sham+antagomir=4<br>TBI+control=4<br>TBI+antagomir=4 | Normal distribution,<br>homogeneity<br>variances | One-way ANOVA,<br>Tukey multiple comparisons test | F (3, 12) = 24.41 | One-way ANOVA, p<0.0001<br><br>Tukey's multiple comparisons test:<br><br>Sham+control vs. Sham+antagomir: p>0.9999<br>Sham+control vs. TBI+control: p<0.0001<br>Sham+control vs. TBI+antagomir: p=0.1868<br>Sham+antagomir vs. TBI+control: p=<0.0001<br>Sham+antagomir vs. TBI+antagomir: p=0.1768<br>TBI+control vs. TBI+antagomir: p=0.0011 |
| 8L:<br>RANTES         | Sham+control=4<br>Sham+antagomir=4<br>TBI+control=4<br>TBI+antagomir=4 | Normal distribution,<br>homogeneity<br>variances | One-way ANOVA,<br>Tukey multiple comparisons test | F (3, 12) = 8.126 | One-way ANOVA, p=0.0032<br><br>Tukey's multiple comparisons test:<br><br>Sham+control vs. Sham+antagomir: p=0.9989<br>Sham+control vs. TBI+control: p=0.0058<br>Sham+control vs. TBI+antagomir: p=0.5823<br>Sham+antagomir vs. TBI+control: p=0.0046<br>Sham+antagomir vs. TBI+antagomir: p=0.5011<br>TBI+control vs. TBI+antagomir: p=0.0557  |
| 8L:<br>SDF-1          | Sham+control=4<br>Sham+antagomir=4<br>TBI+control=4<br>TBI+antagomir=4 | Normal distribution,<br>homogeneity<br>variances | One-way ANOVA,<br>Tukey multiple comparisons test | F (3, 12) = 13.50 | One-way ANOVA, p=0.0004<br><br>Tukey's multiple comparisons test:<br><br>Sham+control vs. Sham+antagomir: p=0.5955<br>Sham+control vs. TBI+control: p=0.0041<br>Sham+control vs. TBI+antagomir: p=0.8661<br>Sham+antagomir vs. TBI+control: p=0.0005<br>Sham+antagomir vs. TBI+antagomir: p=0.9569<br>TBI+control vs. TBI+antagomir: p=0.0011  |
| 8L:<br>TCA-3          | Sham+control=4<br>Sham+antagomir=4<br>TBI+control=4<br>TBI+antagomir=4 | Normal distribution,<br>homogeneity<br>variances | One-way ANOVA,<br>Tukey multiple comparisons test | F (3, 12) = 6.399 | One-way ANOVA, p=0.0078<br><br>Tukey's multiple comparisons test:<br><br>Sham+control vs. Sham+antagomir: p=0.9466<br>Sham+control vs. TBI+control: p=0.0078<br>Sham+control vs. TBI+antagomir: p=0.5369<br>Sham+antagomir vs. TBI+control: p=0.0201                                                                                           |

| Figure               | n                                                                      | Data structure                             | Test used                                             | Statistic                      | P value                                                                                                                                                                                                                                                                                                                                            |
|----------------------|------------------------------------------------------------------------|--------------------------------------------|-------------------------------------------------------|--------------------------------|----------------------------------------------------------------------------------------------------------------------------------------------------------------------------------------------------------------------------------------------------------------------------------------------------------------------------------------------------|
|                      |                                                                        |                                            |                                                       |                                | Sham+antagomir vs. TBI+antagomir: p=0.8386<br>TBI+control vs. TBI+antagomir: p=0.0849                                                                                                                                                                                                                                                              |
| 8L:<br>TECK          | Sham+control=4<br>Sham+antagomir=4<br>TBI+control=4<br>TBI+antagomir=4 | Normal distribution, homogeneity variances | One-way ANOVA, Tukey multiple comparisons test        | F (3, 12) = 15.43              | One-way ANOVA, p=0.0002<br><br>Tukey's multiple comparisons test:<br><br>Sham+control vs. Sham+antagomir: p=0.9534<br>Sham+control vs. TBI+control: p=0.0003<br>Sham+control vs. TBI+antagomir: p=0.7021<br>Sham+antagomir vs. TBI+control: p=0.0007<br>Sham+antagomir vs. TBI+antagomir: p=0.9383<br>TBI+control vs. TBI+antagomir: p=0.0017      |
| 8L:<br>TIMP1         | Sham+control=4<br>Sham+antagomir=4<br>TBI+control=4<br>TBI+antagomir=4 | Normal distribution, homogeneity variances | One-way ANOVA, Tukey multiple comparisons test        | F (3, 12) = 23.57              | One-way ANOVA, p<0.0001<br><br>Tukey's multiple comparisons test:<br><br>Sham+control vs. Sham+antagomir: p=0.9998<br>Sham+control vs. TBI+control: p<0.0001<br>Sham+control vs. TBI+antagomir: p=0.9155<br>Sham+antagomir vs. TBI+control: p<0.0001<br>Sham+antagomir vs. TBI+antagomir: p=0.8835<br>TBI+control vs. TBI+antagomir: p=0.0002      |
| 8L:<br>TIMP2         | Sham+control=4<br>Sham+antagomir=4<br>TBI+control=4<br>TBI+antagomir=4 | Non-normal distribution                    | Kruskal-Wallis test, Dunn's multiple comparisons test | Kruskal-Wallis statistic=10.85 | Kruskal-Wallis test, p=0.0019<br><br>Dunn's multiple comparisons test:<br><br>Sham+control vs. Sham+antagomir: p>0.9999<br>Sham+control vs. TBI+control: p=0.3211<br>Sham+control vs. TBI+antagomir: p>0.9999<br>Sham+antagomir vs. TBI+control: p=0.3211<br>Sham+antagomir vs. TBI+antagomir: p>0.9999<br>TBI+control vs. TBI+antagomir: p=0.0065 |
| 8L:<br>TNF- $\alpha$ | Sham+control=4<br>Sham+antagomir=4<br>TBI+control=4<br>TBI+antagomir=4 | Normal distribution, homogeneity variances | One-way ANOVA, Tukey multiple comparisons test        | F (3, 12) = 9.789              | One-way ANOVA, p=0.0015<br><br>Tukey's multiple comparisons test:<br><br>Sham+control vs. Sham+antagomir: p=0.9976<br>Sham+control vs. TBI+control: p=0.0072<br>Sham+control vs. TBI+antagomir: p=0.8028<br>Sham+antagomir vs. TBI+control: p=0.0099<br>Sham+antagomir vs. TBI+antagomir: p=0.7022<br>TBI+control vs. TBI+antagomir: p=0.0016      |
| 8L:<br>sTNF RI       | Sham+control=4<br>Sham+antagomir=4<br>TBI+control=4<br>TBI+antagomir=4 | Normal distribution, homogeneity variances | One-way ANOVA, Tukey multiple comparisons test        | F (3, 12) = 19.83              | One-way ANOVA, p<0.0001<br><br>Tukey's multiple comparisons test:<br><br>Sham+control vs. Sham+antagomir: p=0.9985<br>Sham+control vs. TBI+control: p=0.0001<br>Sham+control vs. TBI+antagomir: p=0.1092<br>Sham+antagomir vs. TBI+control: p=0.0001<br>Sham+antagomir vs. TBI+antagomir: p=0.0837<br>TBI+control vs. TBI+antagomir: p=0.0072      |
| 8L:<br>sTNF RII      | Sham+control=4<br>Sham+antagomir=4<br>TBI+control=4<br>TBI+antagomir=4 | Normal distribution, homogeneity variances | One-way ANOVA, Tukey multiple comparisons test        | F (3, 12) = 10.70              | One-way ANOVA, p=0.0010<br><br>Tukey's multiple comparisons test:<br><br>Sham+control vs. Sham+antagomir: p=0.9982<br>Sham+control vs. TBI+control: p=0.0047<br>Sham+control vs. TBI+antagomir: p=0.9218<br>Sham+antagomir vs. TBI+control: p=0.0035<br>Sham+antagomir vs. TBI+antagomir: p=0.967<br>TBI+control vs. TBI+antagomir: p=0.0016       |
| S2B                  | Sham+WT=6<br>Sham+KO=6<br>TBI+WT=6<br>TBI+KO=6                         | Normal distribution, homogeneity variances | One-way ANOVA, Tukey multiple comparisons test        | F (3, 20) = 76.42              | One-way ANOVA, p<0.0001<br><br>Tukey's multiple comparisons test:<br><br>Sham+WT vs. Sham+KO: p=0.6719<br>Sham+WT vs. TBI+WT: p<0.0001<br>Sham+WT vs. TBI+KO: p=0.0726<br>Sham+KO vs. TBI+WT: p<0.0001<br>Sham+KO vs. TBI+KO: p=0.044                                                                                                              |

| Figure | n                                              | Data structure                             | Test used                                      | Statistic                      | P value                                                                                                                                                                                                                                                                     |
|--------|------------------------------------------------|--------------------------------------------|------------------------------------------------|--------------------------------|-----------------------------------------------------------------------------------------------------------------------------------------------------------------------------------------------------------------------------------------------------------------------------|
|        |                                                |                                            |                                                |                                | TBI+WT vs. TBI+KO: p<0.0001                                                                                                                                                                                                                                                 |
| S2C    | Sham+WT=6<br>Sham+KO=6<br>TBI+WT=6<br>TBI+KO=6 | Normal distribution, homogeneity variances | One-way ANOVA, Tukey multiple comparisons test | F (3, 20) = 62.14              | One-way ANOVA, p<0.0001<br><br>Tukey's multiple comparisons test:<br><br>Sham+WT vs. Sham+KO: p=0.9921<br>Sham+WT vs. TBI+WT: p<0.0001<br>Sham+WT vs. TBI+KO: p=0.832<br>Sham+KO vs. TBI+WT: p<0.0001<br>Sham+KO vs. TBI+KO: p=0.6787<br>TBI+WT vs. TBI+KO: p<0.0001        |
| S2D    | Sham+WT=6<br>Sham+KO=6<br>TBI+WT=6<br>TBI+KO=6 | Normal distribution, homogeneity variances | One-way ANOVA, Tukey multiple comparisons test | F (3, 20) = 17.85              | One-way ANOVA, p<0.0001<br><br>Tukey's multiple comparisons test:<br><br>Sham+WT vs. Sham+KO: p=0.995<br>Sham+WT vs. TBI+WT: p<0.0001<br>Sham+WT vs. TBI+KO: p=0.9363<br>Sham+KO vs. TBI+WT: p<0.0001<br>Sham+KO vs. TBI+KO: p=0.8434<br>TBI+WT vs. TBI+KO: p=0.0001        |
| S3B    | Sham+WT=6<br>Sham+KO=6<br>TBI+WT=6<br>TBI+KO=6 | Normal distribution, homogeneity variances | One-way ANOVA, Tukey multiple comparisons test | F (3, 20) = 70.79              | One-way ANOVA, p<0.0001<br><br>Tukey's multiple comparisons test:<br><br>Sham+WT vs. Sham+KO: p>0.9999<br>Sham+WT vs. TBI+WT: p<0.0001<br>Sham+WT vs. TBI+KO: p=0.007<br>Sham+KO vs. TBI+WT: p<0.0001<br>Sham+KO vs. TBI+KO: p=0.007<br>TBI+WT vs. TBI+KO: p<0.0001         |
| S3C    | Sham+WT=6<br>Sham+KO=6<br>TBI+WT=6<br>TBI+KO=6 | Normal distribution, homogeneity variances | One-way ANOVA, Tukey multiple comparisons test | F (3, 20) = 35.98              | One-way ANOVA, p<0.0001<br><br>Tukey's multiple comparisons test:<br><br>Sham+WT vs. Sham+KO: p=0.88<br>Sham+WT vs. TBI+WT: p<0.0001<br>Sham+WT vs. TBI+KO: p=0.9633<br>Sham+KO vs. TBI+WT: p<0.0001<br>Sham+KO vs. TBI+KO: p=0.6241<br>TBI+WT vs. TBI+KO: p<0.0001         |
| S3D    | Sham+WT=6<br>Sham+KO=6<br>TBI+WT=6<br>TBI+KO=6 | Normal distribution, homogeneity variances | One-way ANOVA, Tukey multiple comparisons test | F (3, 20) = 73.53              | One-way ANOVA, p<0.0001<br><br>Tukey's multiple comparisons test:<br><br>Sham+WT vs. Sham+KO: p>0.9999<br>Sham+WT vs. TBI+WT: p<0.0001<br>Sham+WT vs. TBI+KO: p=0.0068<br>Sham+KO vs. TBI+WT: p<0.0001<br>Sham+KO vs. TBI+KO: p=0.0059<br>TBI+WT vs. TBI+KO: p<0.0001       |
| S3G    | Sham+WT=6<br>Sham+KO=6<br>TBI+WT=6<br>TBI+KO=6 | Normal distribution, homogeneity variances | One-way ANOVA, Tukey multiple comparisons test | F (3, 20) = 191.5              | One-way ANOVA, p<0.0001<br><br>Tukey's multiple comparisons test:<br><br>Sham+WT vs. Sham+KO: p=0.9997<br>Sham+WT vs. TBI+WT: p<0.0001<br>Sham+WT vs. TBI+KO: p<0.0001<br>Sham+KO vs. TBI+WT: p<0.0001<br>Sham+KO vs. TBI+KO: p<0.0001<br>TBI+WT vs. TBI+KO: p<0.0001       |
| S3H    | Sham+WT=6<br>Sham+KO=6<br>TBI+WT=6<br>TBI+KO=6 | Normal distribution, homogeneity variances | One-way ANOVA, Tukey multiple comparisons test | Kruskal-Wallis statistic=4.362 | Kruskal-Wallis test, p=0.22249<br><br>Dunn's multiple comparisons test:<br><br>Sham+WT vs. Sham+KO: p>0.9999<br>Sham+WT vs. TBI+WT: p=0.2523<br>Sham+WT vs. TBI+KO: p>0.9999<br>Sham+KO vs. TBI+WT: p=0.9166<br>Sham+KO vs. TBI+KO: p>0.9999<br>TBI+WT vs. TBI+KO: p>0.9999 |
| S4B    | Pre=3                                          | Normal                                     | One-way                                        | F (5, 12) = 21.18              | One-way ANOVA, p<0.0001                                                                                                                                                                                                                                                     |

| Figure | n                                                                      | Data structure                                                     | Test used                                                         | Statistic                                                                                      | P value                                                                                                                                                                                                                                                                                                                                        |
|--------|------------------------------------------------------------------------|--------------------------------------------------------------------|-------------------------------------------------------------------|------------------------------------------------------------------------------------------------|------------------------------------------------------------------------------------------------------------------------------------------------------------------------------------------------------------------------------------------------------------------------------------------------------------------------------------------------|
|        | 1d=3<br>2d=3<br>3d=3<br>5d=3<br>7d=3                                   | distribution,<br>homogeneity<br>variances                          | ANOVA,<br>Dunnett's<br>multiple<br>comparisons<br>test            |                                                                                                | Dunnett's multiple comparisons test<br><br>Pre vs. 1d: p<0.0001<br>Pre vs. 2d: p=0.0004<br>Pre vs. 3d: p<0.0001<br>Pre vs. 5d: p<0.0001<br>Pre vs. 7d: p=0.0002                                                                                                                                                                                |
| S4C    | Pre=3<br>1d=3<br>2d=3<br>3d=3<br>5d=3<br>7d=3                          | Normal<br>distribution,<br>homogeneity<br>variances                | One-way<br>ANOVA,<br>Dunnett's<br>multiple<br>comparisons<br>test | F (5, 12) = 16.39                                                                              | One-way ANOVA, p<0.0001<br><br>Dunnett's multiple comparisons test<br><br>Pre vs. 1d: p=0.0016<br>Pre vs. 2d: p=0.0111<br>Pre vs. 3d: p<0.0001<br>Pre vs. 5d: p<0.0001<br>Pre vs. 7d: p=0.0003                                                                                                                                                 |
| S4D    | Pre=3<br>1d=3<br>2d=3<br>3d=3<br>5d=3<br>7d=3                          | Normal<br>distribution,<br>homogeneity<br>variances                | One-way<br>ANOVA,<br>Dunnett's<br>multiple<br>comparisons<br>test | F (5, 12) = 14.86                                                                              | One-way ANOVA, p<0.0001<br><br>Dunnett's multiple comparisons test<br><br>Pre vs. 1d: p<0.0001<br>Pre vs. 2d: p<0.0001<br>Pre vs. 3d: p=0.01<br>Pre vs. 5d: p=0.0104<br>Pre vs. 7d: p=0.0008                                                                                                                                                   |
| S4E    | Pre=3<br>1d=3<br>2d=3<br>3d=3<br>5d=3<br>7d=3                          | Normal<br>distribution,<br>homogeneity<br>variances                | One-way<br>ANOVA,<br>Dunnett's<br>multiple<br>comparisons<br>test | F (5, 12) = 13.22                                                                              | One-way ANOVA, p<0.0001<br><br>Dunnett's multiple comparisons test<br><br>Pre vs. 1d: p<0.0001<br>Pre vs. 2d: p=0.0023<br>Pre vs. 3d: p=0.0009<br>Pre vs. 5d: p=0.1475<br>Pre vs. 7d: p=0.1495                                                                                                                                                 |
| S6A    | TBI+control=10<br>TBI+antagomir=10                                     | Non-<br>normal/Normal<br>distribution,<br>homogeneity<br>variances | Unpaired t<br>test or Mann<br>Whitney test                        | t=2.590, df=18<br>U=35<br>t=1.055, df=18<br>t=1.063, df=18<br>t=1.689, df=18<br>t=2.541, df=18 | TBI+control vs. TBI+antagomir Slice 1: p=0.0185<br>TBI+control vs. TBI+antagomir Slice 2: p=0.2799<br>TBI+control vs. TBI+antagomir Slice 3: p=0.3054<br>TBI+control vs. TBI+antagomir Slice 4: p=0.3021<br>TBI+control vs. TBI+antagomir Slice 5: p=0.1085<br>TBI+control vs. TBI+antagomir Slice 6: p=0.0205                                 |
| S6D    | Sham+control=6<br>Sham+antagomir=6<br>TBI+control=6<br>TBI+antagomir=6 | Normal<br>distribution,<br>homogeneity<br>variances                | One-way<br>ANOVA,<br>Tukey<br>multiple<br>comparisons<br>test     | F (3, 20) = 133.3                                                                              | One-way ANOVA, p<0.0001<br><br>Tukey's multiple comparisons test:<br><br>Sham+control vs. Sham+antagomir: p>0.9999<br>Sham+control vs. TBI+control: p<0.0001<br>Sham+control vs. TBI+antagomir: p<0.0001<br>Sham+antagomir vs. TBI+control: p<0.0001<br>Sham+antagomir vs. TBI+antagomir: p<0.0001<br>TBI+control vs. TBI+antagomir: p<0.0001  |
| S6E    | Sham+control=6<br>Sham+antagomir=6<br>TBI+control=6<br>TBI+antagomir=6 | Normal<br>distribution,<br>homogeneity<br>variances                | One-way<br>ANOVA,<br>Tukey<br>multiple<br>comparisons<br>test     | F (3, 20) = 129.1                                                                              | One-way ANOVA, p<0.0001<br><br>Tukey's multiple comparisons test:<br><br>Sham+control vs. Sham+antagomir: p=0.8004<br>Sham+control vs. TBI+control: p<0.0001<br>Sham+control vs. TBI+antagomir: p<0.0001<br>Sham+antagomir vs. TBI+control: p<0.0001<br>Sham+antagomir vs. TBI+antagomir: p<0.0001<br>TBI+control vs. TBI+antagomir: p<0.0001  |
| S6F    | Sham+control=6<br>Sham+antagomir=6<br>TBI+control=6<br>TBI+antagomir=6 | Normal<br>distribution,<br>homogeneity<br>variances                | One-way<br>ANOVA,<br>Tukey<br>multiple<br>comparisons<br>test     | F (3, 20) = 0.6869                                                                             | One-way ANOVA, p= 0.5705<br><br>Tukey's multiple comparisons test:<br><br>Sham+control vs. Sham+antagomir: p=0.7562<br>Sham+control vs. TBI+control: p=0.9948<br>Sham+control vs. TBI+antagomir: p=0.6189<br>Sham+antagomir vs. TBI+control: p=0.8762<br>Sham+antagomir vs. TBI+antagomir: p=0.9953<br>TBI+control vs. TBI+antagomir: p=0.7608 |
| S7B    | Sham+control=6<br>Sham+antagomir=6<br>TBI+control=6<br>TBI+antagomir=6 | Normal<br>distribution,<br>homogeneity<br>variances                | One-way<br>ANOVA,<br>Tukey<br>multiple<br>comparisons<br>test     | F (3, 20) = 144.1                                                                              | One-way ANOVA, p<0.0001<br><br>Tukey's multiple comparisons test:<br><br>Sham+control vs. Sham+antagomir: p=0.9979<br>Sham+control vs. TBI+control: p<0.0001                                                                                                                                                                                   |

| Figure | n                                                                      | Data structure                             | Test used                                      | Statistic         | P value                                                                                                                                                                                                                                                                                                                                       |
|--------|------------------------------------------------------------------------|--------------------------------------------|------------------------------------------------|-------------------|-----------------------------------------------------------------------------------------------------------------------------------------------------------------------------------------------------------------------------------------------------------------------------------------------------------------------------------------------|
|        |                                                                        |                                            |                                                |                   | Sham+control vs. TBI+antagomir: p<0.0001<br>Sham+antagomir vs. TBI+control: p<0.0001<br>Sham+antagomir vs. TBI+antagomir: p<0.0001<br>TBI+control vs. TBI+antagomir: p<0.0001                                                                                                                                                                 |
| S7C    | Sham+control=6<br>Sham+antagomir=6<br>TBI+control=6<br>TBI+antagomir=6 | Normal distribution, homogeneity variances | One-way ANOVA, Tukey multiple comparisons test | F (3, 20) = 13.48 | One-way ANOVA, p<0.0001<br><br>Tukey's multiple comparisons test:<br><br>Sham+control vs. Sham+antagomir: p>0.9999<br>Sham+control vs. TBI+control: p=0.0001<br>Sham+control vs. TBI+antagomir: p=0.622<br>Sham+antagomir vs. TBI+control: p=0.0001<br>Sham+antagomir vs. TBI+antagomir: p=0.6399<br>TBI+control vs. TBI+antagomir: p=0.002   |
| S7D    | Sham+control=6<br>Sham+antagomir=6<br>TBI+control=6<br>TBI+antagomir=6 | Normal distribution, homogeneity variances | One-way ANOVA, Tukey multiple comparisons test | F (3, 20) = 67.78 | One-way ANOVA, p<0.0001<br><br>Tukey's multiple comparisons test:<br><br>Sham+control vs. Sham+antagomir: p=0.9965<br>Sham+control vs. TBI+control: p<0.0001<br>Sham+control vs. TBI+antagomir: p=0.2106<br>Sham+antagomir vs. TBI+control: p<0.0001<br>Sham+antagomir vs. TBI+antagomir: p=0.2945<br>TBI+control vs. TBI+antagomir: p<0.0001 |

## Supplementary information

### **Loss-of-microRNA-15a/16-1 function promotes neuropathological and functional recovery in experimental traumatic brain injury**

Chao Zhou<sup>1,2</sup>; Shun Li<sup>1,2</sup>; Na Qiu<sup>1,2</sup>; Ping Sun<sup>1,2</sup>; Milton H. Hamblin<sup>3</sup>; C. Edward Dixon<sup>2,4</sup>; Jun Chen<sup>1,2</sup>; Ke-Jie Yin<sup>1,2\*</sup>.

1. Department of Neurology, University of Pittsburgh School of Medicine, Pittsburgh, PA 15213, USA

2. Geriatric Research Education and Clinical Center, Veterans Affairs Pittsburgh Healthcare System, Pittsburgh, PA 15240, USA

3. Division of Biomedical Sciences, School of Medicine, University of California Riverside, Riverside, CA 92521, USA

4. Department of Neurosurgery, University of Pittsburgh School of Medicine, Pittsburgh, PA, 15213, USA

**\*Correspondence addressed to:** Ke-Jie Yin, M.D., Ph.D.

Department of Neurology, University of Pittsburgh School of Medicine, S514 BST, 200 Lothrop Street, Pittsburgh, PA 15213

Email: [yink2@upmc.edu](mailto:yink2@upmc.edu)

Tel: 412-383-6038

Fax: 412-648-8081

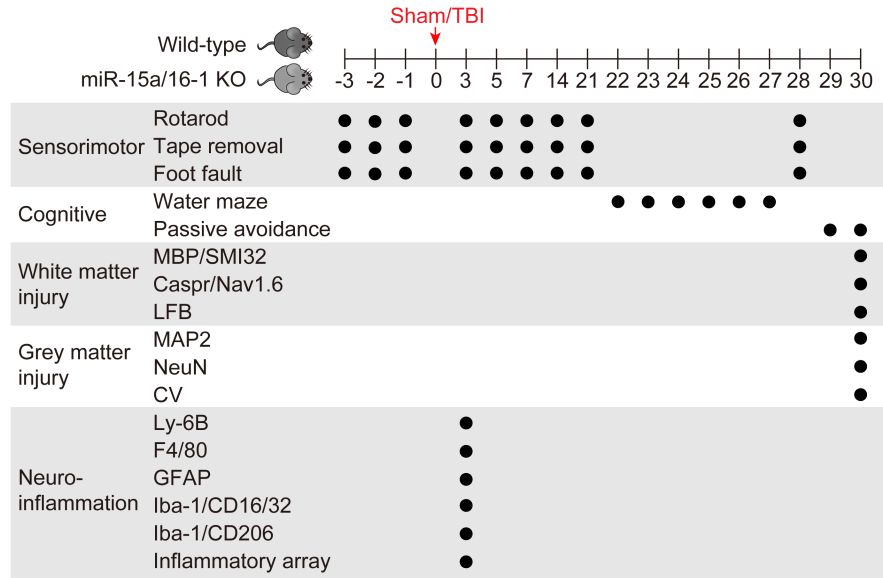

**Figure S1 Schematic diagram of experimental design.** MiR-15a/16-1 KO and WT mice were subjected to TBI or sham operation. Long-term sensorimotor function was examined by rotarod test, adhesive tape removal test, and foot fault test in experimental mice before and up to 28 d after operation. Cognitive function was examined by Morris water maze test and passive avoidance test in mice 23-30 d after operation. White matter injury was evaluated by histological staining of LFB, double immunostaining of MBP/SMI32, and Caspr/Nav1.6 in mouse brain sections at 30 d after operation. Grey matter injury was evaluated by histological staining of CV, and immunostaining of MAP2 and NeuN. Neuroinflammation was examined by Ly-6B, F4/80, GFAP, Iba-1/CD16/32, Iba-1/CD206 immunostaining, and inflammatory array.



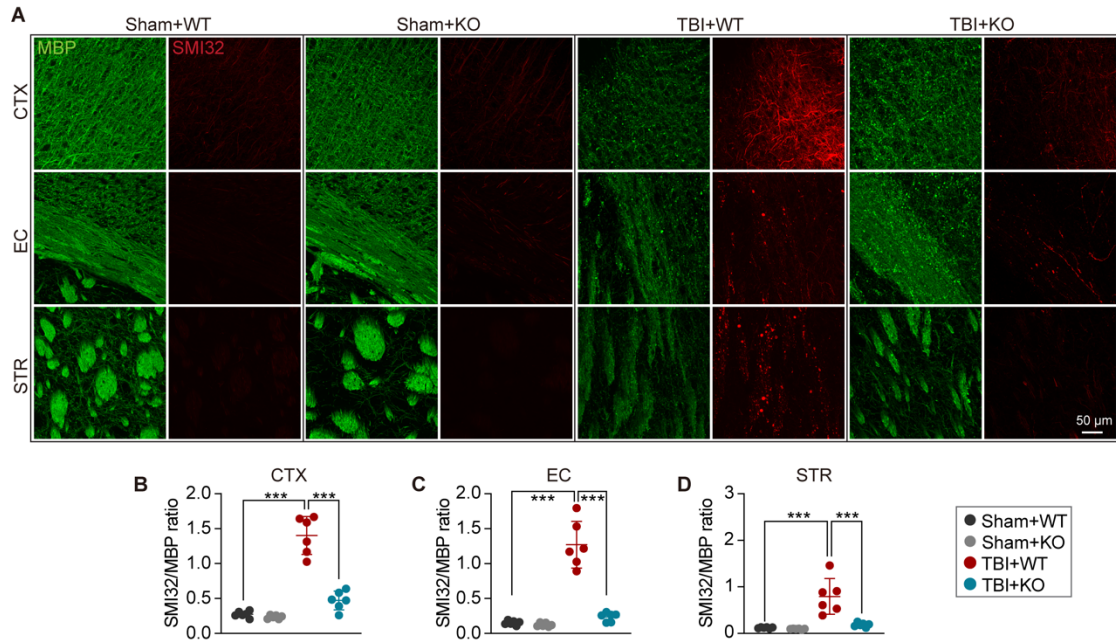

**Figure S2 Genetic deletion of the miR-15a/16-1 cluster reduces axonal damage in mouse brains at 30 d after TBI.** (A) Representative immunofluorescence staining images of MBP (green) and SMI32 (red) in peri-lesional cerebral cortex (CTX), external capsule (EC), and striatum (STR) areas. (B-D). Quantitative analysis of the SMI32/MBP ratio in peri-lesional CTX, EC, and STR areas showed less axonal damage in miR-15a/16-1 KO mice 30 d after TBI compared with WT controls. Data are represented as mean  $\pm$  SD,  $n=6$ /group. \* $p<0.05$ , \*\* $p<0.01$ , or \*\*\* $p<0.001$  versus TBI+WT group. Statistical analyses were performed by one-way ANOVA and Tukey's tests. Related to Figure 3

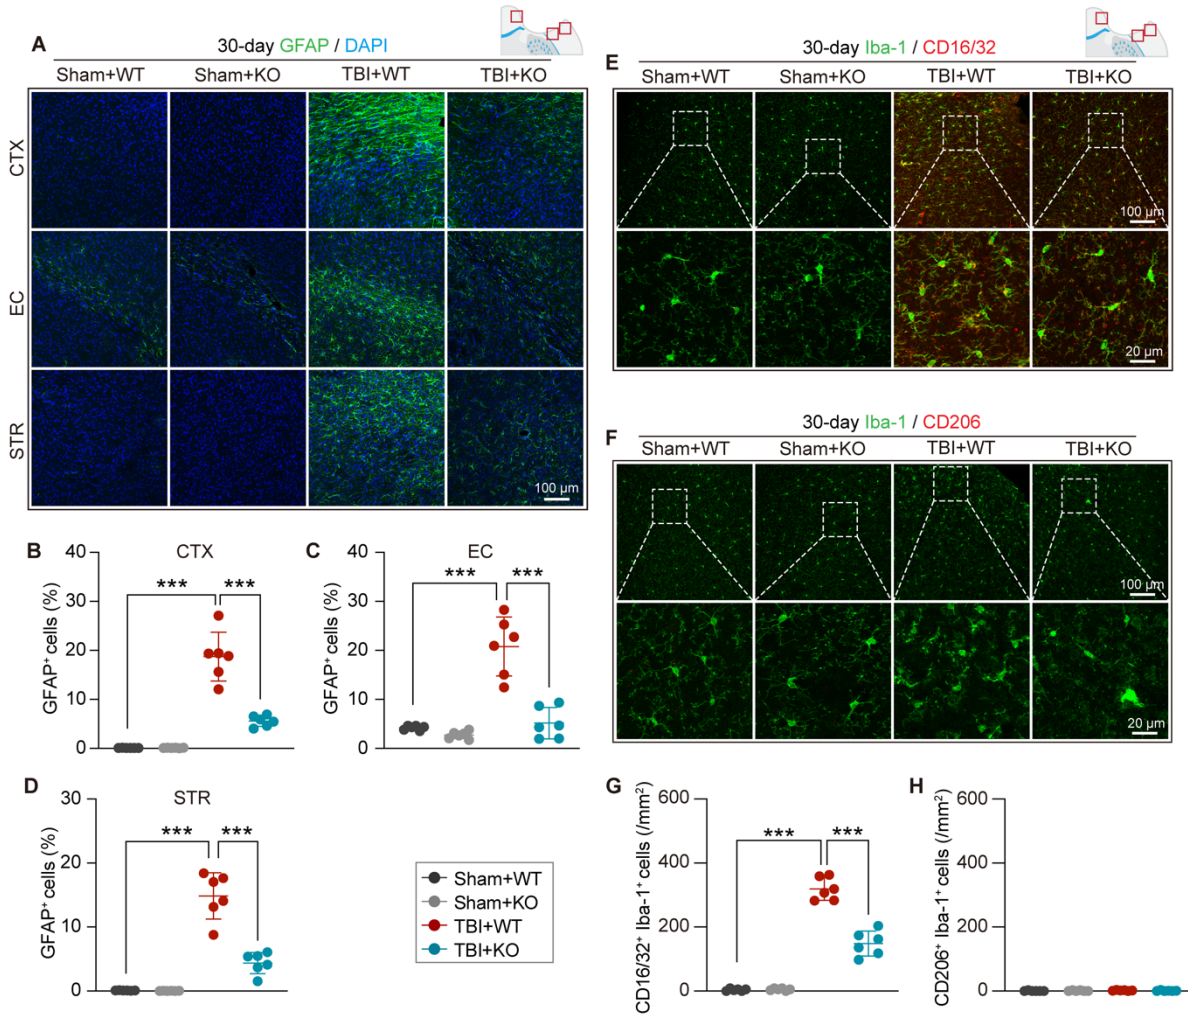

**Figure S3 Genetic deletion of miR-15a/16-1 reduced astrocytic activation and the polarization of pro-inflammatory microglia/macrophages 30 d after TBI.** (A) Representative immunofluorescence staining images of GFAP (green) / DAPI (blue) in peri-lesional cerebral cortex (CTX), external capsule (EC), and striatum (STR) areas. (B-D) Quantitative analysis of GFAP-positive cells in peri-lesional CTX, EC, and STR areas. (E, F) Representative immunofluorescence staining images of Iba-1 (green) / CD16/32 (red) and Iba-1 (green) / CD206 (red). (G, H) Quantitative analysis of Iba-1&CD16/32-positive cells and Iba-1&CD206-positive cells in peri-lesional regions. Data are represented as mean  $\pm$  SD, n=6/group. \*p<0.05, \*\*p<0.01, or \*\*\*p<0.001 versus TBI+WT group. Statistical analyses were performed by one-way ANOVA and Tukey's tests.

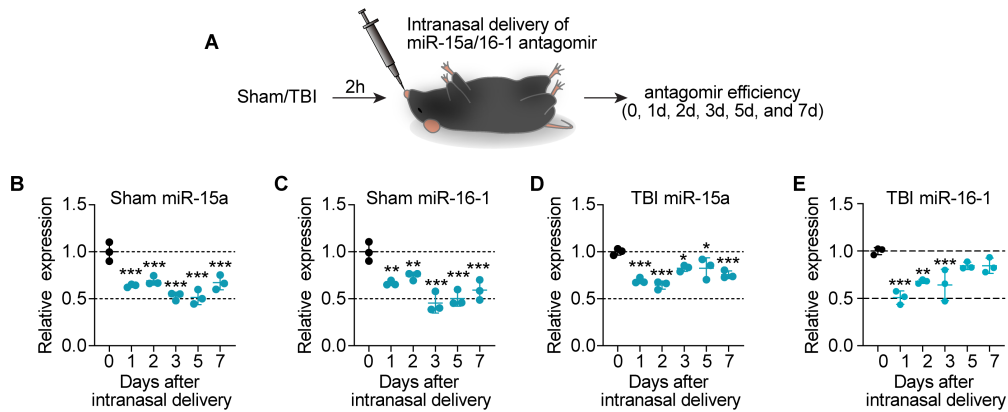

**Figure S4 Intranasal delivery of the miR-15a/16-1 antagomir reduces cerebral miR-15a/16-1 expression under sham or TBI conditions.** (A) A total of 1 nmol (8.1 $\mu$ g)/24  $\mu$ l miR-15a/16-1 antagomir was intranasally delivered to C57BL/6J mice 2 h after TBI/sham operation and the miR-15a/16-1 inhibitory efficiency was examined in mouse brains up to 7 d after administration. Quantitative PCR was used to detect the relative expression of miR-15a and miR-16-1 in mouse brains at pre, 1, 2, 3, 5, and 7 d after intranasal delivery of the miR-15a/16-1 antagomir. (B, C) Quantitative analysis of the relative expression of miR-15a and miR-16-1 in mouse brains under sham conditions. (D, E) Quantitative analysis of the relative expression of miR-15a and miR-16-1 in mouse brains under TBI conditions.

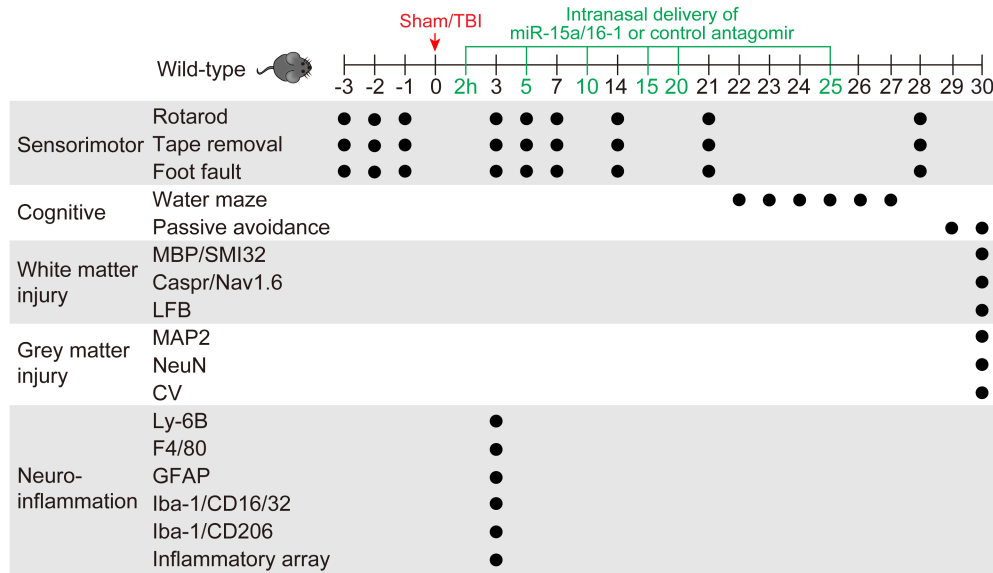

**Figure S5 Schematic diagram of experimental design.** C57BL/6J mice were subjected to TBI or sham operation. MiR-15a/16-1 antagomir or control antagomir was intranasally delivered to the mice at 2 h, 5 d, 10 d, 15 d, 20 d, and 25 d after CCI surgery. Long-term sensorimotor function was examined by rotarod test, adhesive tape removal test, and foot fault test in experimental mice before and up to 28 d after operation. Cognitive function was examined by the Morris water maze test and passive avoidance test in mice 23-30 d after operation. White matter injury was evaluated by histological staining of LFB, double immunostaining of MBP/SMI32, and Caspr/Nav1.6 in mouse brain sections at 30 d after operation. Grey matter injury was evaluated by histological staining of CV, and immunostaining of MAP2 and NeuN. Neuroinflammation was examined by Ly-6B, F4/80, GFAP, Iba-1/CD16/32, Iba-1/CD206 immunostaining, and inflammatory array.

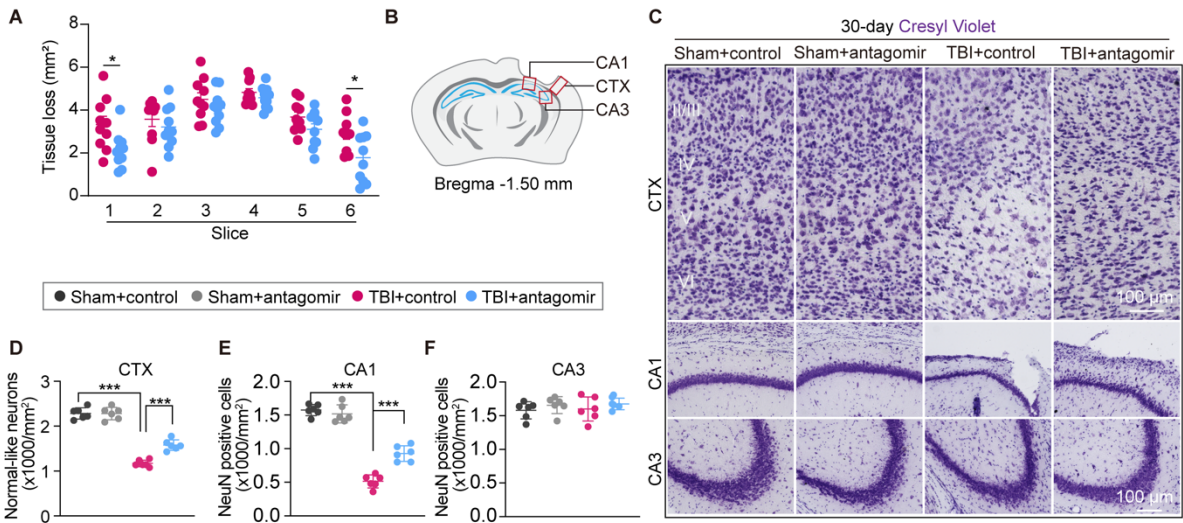

**Figure S6 Intranasal delivery of miR-15a/16-1 antagomir reduces TBI-induced neuronal loss.** C57BL/6J mice were subjected to experimental TBI and intranasally treated with miR-15a/16-1 antagomir or control antagomir at 2 h, 5 d, 10 d, 15 d, 20 d, and 25 d after CCI surgery. MAP2 immunostaining and CV staining were performed to examine brain tissue loss and neuronal loss in the peri-lesional cerebral cortex (CTX), and hippocampal CA1 and CA3 areas at 30 d after TBI. (A) Quantitative analysis of brain tissue loss in each cross-sectional area immunostained by MAP2. (B) Coordinates and brain regions for CV staining. (C) Representative images of CV staining in peri-lesional CTX, CA1, and CA3 regions. (D-F) Quantitative analysis of CV-stained cells in peri-lesional CTX, CA1, and CA3 regions.

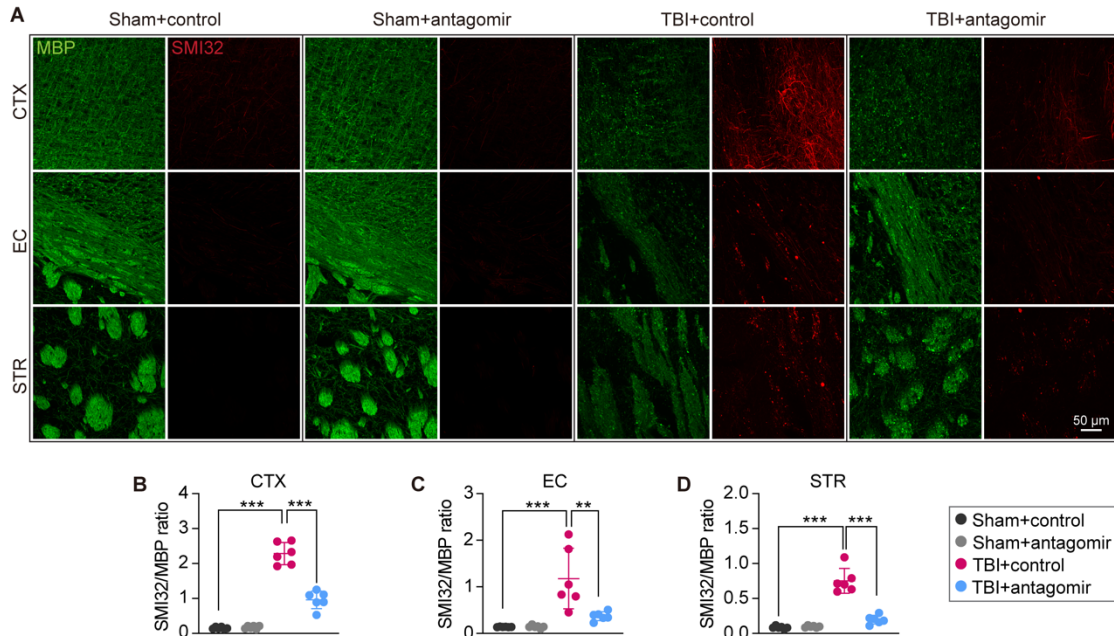

**Figure S7** Intranasal delivery of the miR-15a/16-1 antagomir reduces axonal damage in mouse brains at 30 d after TBI. (A) Representative immunofluorescence staining images of MBP (green) and SMI32 (red) in the peri-lesional cerebral cortex (CTX), external capsule (EC), and striatum (STR) areas. (B-D). Quantitative analysis of the SMI32/MBP ratio in peri-lesional CTX, EC, and STR areas showed less axonal damage in miR-15a/16-1 antagomir-treated mice 30 d after TBI compared with control antagomir-treated mice. Data are represented as mean  $\pm$  SD,  $n=6$ /group. \* $p<0.05$ , \*\* $p<0.01$ , or \*\*\* $p<0.001$  versus TBI+control antagomir group. Statistical analyses were performed by one-way ANOVA and Tukey's tests. Related to Figure 6.

|   |               |                    |                  |                   |    |
|---|---------------|--------------------|------------------|-------------------|----|
| A | RANTES        | IL13               | GM-CSF           | POS               | 1  |
| B | SDF-1         | IL17               | IFN- $\gamma$    | POS               | 2  |
| C | TCA-3         | I-TAC              | IL-1 $\alpha$    | NEG               | 3  |
| D | TECK          | KC                 | IL-1 $\beta$     | NEG               | 4  |
| E | TIMP-1        | Leptin             | IL2              | Blank             | 5  |
| F | TIMP-2        | LIX                | IL3              | BLC               | 6  |
| G | TNF- $\alpha$ | Lympho-<br>-factin | IL4              | CD30L             | 7  |
| H | sTNF RI       | MCP-1              | IL6              | Eotaxin           | 8  |
| I | sTNF RII      | M-CSF              | IL9              | Eotaxin-2         | 9  |
| J | Blank         | MIG                | IL10             | FAS<br>ligand     | 10 |
| K | Blank         | MIP-1- $\alpha$    | IL12-p40/<br>p70 | Fractal-<br>-kine | 11 |
| L | POS           | MIP-1- $\gamma$    | IL12-p70         | G-CSF             | 12 |

Figure S8 Array map of 40 inflammatory mediators. Related to Figure 8.



**Table S1. List of primary antibodies used in this study**

| Antibody | Host species | Dilution | Company        | Cat #       |
|----------|--------------|----------|----------------|-------------|
| MAP2     | Rabbit       | 1:500    | Millipore      | AB5622      |
| NeuN     | Rabbit       | 1:500    | EMD Millipore  | ABN78       |
| MBP      | Rabbit       | 1:500    | Abcam          | Ab40390     |
| SMI32    | Mouse        | 1:500    | BioLegend      | 801701      |
| Caspr    | Mouse        | 1:200    | EMD Millipore  | MABN69      |
| Nav1.6   | Rabbit       | 1:200    | Millipore      | AB5580-50UL |
| GFAP     | Rabbit       | 1:500    | Sigma-Aldrich  | G9269       |
| Iba-1    | Rabbit       | 1:500    | Wako           | 019-19741   |
| CD16/32  | Mouse        | 1:200    | BD Biosciences | 553124      |
| CD206    | Goat         | 1:200    | R&D Systems    | AF2535      |
| Ly-6B    | Rat          | 1:100    | Abcam          | Ab53453     |
| F4/80    | Mouse        | 1:200    | BioLegend      | 123102      |

**Table S2. Pearson correlation analysis (r value) in Figure 2**

|          | Latency to fall | Time to touch | Time to remove | Forepaw foot fault | Hindpaw foot fault | Latency to platform | Target time | Latency to dark |
|----------|-----------------|---------------|----------------|--------------------|--------------------|---------------------|-------------|-----------------|
| CV-CTX   | 0.86706         | -0.79914      | -0.85740       | -0.80001           | -0.82078           | -0.70096            | 0.47817     | 0.58136         |
| CV-CA1   | 0.89831         | -0.92213      | -0.87595       | -0.91672           | -0.87386           | -0.85406            | 0.62714     | 0.71896         |
| CV-CA3   | 0.16612         | -0.06261      | -0.21223       | -0.18359           | -0.20059           | -0.04923            | 0.15444     | 0.38573         |
| NeuN-CTX | 0.87773         | -0.88180      | -0.89025       | -0.90132           | -0.88108           | -0.81867            | 0.60380     | 0.73205         |
| NeuN-CA1 | 0.90530         | -0.80652      | -0.82693       | -0.78134           | -0.81959           | -0.63697            | 0.63905     | 0.73602         |
| NeuN-CA3 | 0.31180         | -0.34527      | -0.52110       | -0.32519           | -0.34287           | -0.27249            | -0.05297    | 0.31715         |

**Table S3. Pearson correlation analysis (p value) in Figure 2**



|          | Latency to fall | Time to touch | Time to remove | Forepaw foot fault | Hindpaw foot fault | Latency to platform | Target time | Latency to dark |
|----------|-----------------|---------------|----------------|--------------------|--------------------|---------------------|-------------|-----------------|
| CV-CTX   | 4.22E-08        | 2.82E-06      | 8.70E-08       | 2.71E-06           | 8.98E-07           | 0.00013603          | 0.01810675  | 0.00288747      |
| CV-CA1   | 2.57E-09        | 1.53E-10      | 2.05E-08       | 3.12E-10           | 2.45E-08           | 1.10E-07            | 0.00103854  | 7.55E-05        |
| CV-CA3   | 0.43787916      | 0.77131998    | 0.31944405     | 0.39050289         | 0.34731557         | 0.81928733          | 0.47118979  | 0.06266417      |
| NeuN-CTX | 1.77E-08        | 1.24E-08      | 5.72E-09       | 1.88E-09           | 1.32E-08           | 1.01E-06            | 0.00178284  | 4.78E-05        |
| NeuN-CA1 | 1.22E-09        | 1.94E-06      | 6.30E-07       | 6.57E-06           | 9.60E-07           | 0.00081651          | 0.00077513  | 4.14E-05        |
| NeuN-CA3 | 0.13801319      | 0.09844227    | 0.00902517     | 0.12101023         | 0.10096218         | 0.19768005          | 0.8058364   | 0.1310258       |

**Table S4. Pearson correlation analysis (r value) in Figure 3**

|                     | Latency to fall | Time to touch | Time to remove | Forepaw foot fault | Hindpaw foot fault | Latency to platform | Target time | Latency to dark |
|---------------------|-----------------|---------------|----------------|--------------------|--------------------|---------------------|-------------|-----------------|
| LFB-CTX             | 0.863232        | -0.86484      | -0.85019       | -0.87763           | -0.84367           | -0.76888            | 0.592332    | 0.666777        |
| LFB-EC              | 0.899337        | -0.86566      | -0.80047       | -0.87721           | -0.86472           | -0.79596            | 0.643032    | 0.820506        |
| LFB-STR             | 0.865641        | -0.85245      | -0.83466       | -0.86384           | -0.91838           | -0.80759            | 0.647759    | 0.654122        |
| MBP-CTX             | 0.850161        | -0.90457      | -0.86175       | -0.83624           | -0.88277           | -0.79752            | 0.653146    | 0.587781        |
| MBP-EC              | 0.897282        | -0.9075       | -0.84445       | -0.82299           | -0.87717           | -0.74958            | 0.636873    | 0.687698        |
| MBP-STR             | 0.858782        | -0.80766      | -0.77746       | -0.81569           | -0.81134           | -0.74908            | 0.588445    | 0.628437        |
| SMI32-CTX           | -0.85907        | 0.778746      | 0.785814       | 0.905284           | 0.866624           | 0.849342            | -0.69787    | -0.669          |
| SMI32-EC            | -0.82218        | 0.821646      | 0.738757       | 0.884964           | 0.89308            | 0.887689            | -0.74307    | -0.69979        |
| SMI32-STR           | -0.79243        | 0.846477      | 0.73011        | 0.730578           | 0.833625           | 0.691158            | -0.64264    | -0.6924         |
| SMI32/MBP ratio-CTX | -0.88523        | 0.836236      | 0.841945       | 0.914872           | 0.903435           | 0.864767            | -0.70525    | -0.6644         |
| SMI32/MBP ratio-EC  | -0.84391        | 0.863386      | 0.757162       | 0.873439           | 0.904244           | 0.874154            | -0.73936    | -0.71122        |
| SMI32/MBP ratio-STR | -0.72316        | 0.792744      | 0.685113       | 0.683667           | 0.781045           | 0.68314             | -0.60691    | -0.58597        |
| Number of NOR       | 0.904024        | -0.93031      | -0.87743       | -0.88967           | -0.89668           | -0.84476            | 0.65075     | 0.665149        |
| Paranode length     | 0.84846         | -0.90487      | -0.88875       | -0.89932           | -0.88921           | -0.87335            | 0.621393    | 0.696302        |

|                        |          |          |          |          |         |          |          |          |
|------------------------|----------|----------|----------|----------|---------|----------|----------|----------|
| Length of paranode gap | -0.61963 | 0.635958 | 0.585451 | 0.523172 | 0.57521 | 0.407121 | -0.48093 | -0.60414 |
|------------------------|----------|----------|----------|----------|---------|----------|----------|----------|

**Table S5. Pearson correlation analysis (p value) in Figure 3**

|                        | Latency to fall | Time to touch | Time to remove | Forepaw foot fault | Hindpaw foot fault | Latency to platform | Target time | Latency to dark |
|------------------------|-----------------|---------------|----------------|--------------------|--------------------|---------------------|-------------|-----------------|
| LFB-CTX                | 5.65E-08        | 5.00E-08      | 1.45E-07       | 1.78E-08           | 2.24E-07           | 1.14E-05            | 0.002291    | 0.000373        |
| LFB-EC                 | 2.31E-09        | 4.70E-08      | 2.64E-06       | 1.85E-08           | 5.05E-08           | 3.30E-06            | 0.000701    | 9.12E-07        |
| LFB-STR                | 4.71E-08        | 1.24E-07      | 3.96E-07       | 5.40E-08           | 2.52E-10           | 1.84E-06            | 0.000621    | 0.000526        |
| MBP-CTX                | 1.45E-07        | 1.32E-09      | 6.32E-08       | 3.59E-07           | 1.14E-08           | 3.06E-06            | 0.00054     | 0.002524        |
| MBP-EC                 | 2.86E-09        | 9.48E-10      | 2.13E-07       | 7.92E-07           | 1.85E-08           | 2.49E-05            | 0.000818    | 0.000204        |
| MBP-STR                | 7.87E-08        | 1.83E-06      | 7.82E-06       | 1.19E-06           | 1.51E-06           | 2.53E-05            | 0.002489    | 0.001007        |
| SMI32-CTX              | 7.70E-08        | 7.39E-06      | 5.36E-06       | 1.22E-09           | 4.36E-08           | 1.53E-07            | 0.00015     | 0.000351        |
| SMI32-EC               | 8.29E-07        | 8.55E-07      | 3.74E-05       | 9.36E-09           | 4.35E-09           | 7.29E-09            | 3.19E-05    | 0.000141        |
| SMI32-STR              | 3.92E-06        | 1.86E-07      | 5.12E-05       | 5.04E-05           | 4.22E-07           | 0.000184            | 0.000708    | 0.000177        |
| SMI32/MBP ratio-CTX    | 9.14E-09        | 3.59E-07      | 2.50E-07       | 3.94E-10           | 1.49E-09           | 5.03E-08            | 0.000119    | 0.000399        |
| SMI32/MBP ratio-EC     | 2.20E-07        | 5.59E-08      | 1.84E-05       | 2.53E-08           | 1.37E-09           | 2.39E-08            | 3.66E-05    | 9.77E-05        |
| SMI32/MBP ratio-STR    | 6.54E-05        | 3.86E-06      | 0.000221       | 0.00023            | 6.66E-06           | 0.000234            | 0.001663    | 0.002623        |
| Number of NOR          | 1.40E-09        | 4.69E-11      | 1.81E-08       | 6.05E-09           | 3.04E-09           | 2.08E-07            | 0.000575    | 0.000391        |
| Paranode length        | 1.63E-07        | 1.27E-09      | 6.60E-09       | 2.32E-09           | 6.32E-09           | 2.55E-08            | 0.001191    | 0.000157        |
| Length of paranode gap | 0.001241        | 0.000837      | 0.002651       | 0.008707           | 0.003276           | 0.048326            | 0.017358    | 0.001769        |

**Table S6. Pearson correlation analysis (r value) in Figure 5**

|        | Latency to fall | Time to touch | Time to remove | Forepaw foot fault | Hindpaw foot fault | Latency to platform | Target time | Latency to dark |
|--------|-----------------|---------------|----------------|--------------------|--------------------|---------------------|-------------|-----------------|
| CV-CTX | 0.90772         | -0.88519      | -0.91923       | -0.95170           | -0.93755           | -0.78547            | 0.77350     | 0.76386         |
| CV-CA1 | 0.80187         | -0.83018      | -0.84218       | -0.86008           | -0.91102           | -0.68542            | 0.61121     | 0.62419         |
| CV-CA3 | 0.42378         | -0.25336      | -0.29438       | -0.39200           | -0.33771           | -0.40436            | 0.32606     | 0.50319         |

|          |         |          |          |          |          |          |          |         |
|----------|---------|----------|----------|----------|----------|----------|----------|---------|
| NeuN-CTX | 0.89929 | -0.91071 | -0.93377 | -0.93444 | -0.95229 | -0.78147 | 0.74774  | 0.70779 |
| NeuN-CA1 | 0.90834 | -0.89306 | -0.91729 | -0.95125 | -0.94676 | -0.77581 | 0.73029  | 0.74079 |
| NeuN-CA3 | 0.09714 | 0.09747  | 0.08542  | -0.00440 | -0.08921 | -0.08876 | -0.05075 | 0.09244 |

**Table S7. Pearson correlation analysis (p value) in Figure 5**

|          | Latency to fall | Time to touch | Time to remove | Forepaw foot fault | Hindpaw foot fault | Latency to platform | Target time | Latency to dark |
|----------|-----------------|---------------|----------------|--------------------|--------------------|---------------------|-------------|-----------------|
| CV-CTX   | 9.24E-10        | 9.17E-09      | 2.26E-10       | 9.20E-13           | 1.45E-11           | 5.44E-06            | 9.31E-06    | 1.40E-05        |
| CV-CA1   | 2.46E-06        | 5.20E-07      | 2.46E-07       | 7.15E-08           | 6.29E-10           | 0.00021884          | 0.00150879  | 0.00111471      |
| CV-CA3   | 0.0390509       | 0.23225277    | 0.16261237     | 0.05815806         | 0.10654572         | 0.05001383          | 0.11996526  | 0.01219456      |
| NeuN-CTX | 2.32E-09        | 6.53E-10      | 2.72E-11       | 2.44E-11           | 8.04E-13           | 6.53E-06            | 2.67E-05    | 0.00010934      |
| NeuN-CA1 | 8.61E-10        | 4.36E-09      | 2.90E-10       | 1.02E-12           | 2.62E-12           | 8.41E-06            | 5.09E-05    | 3.47E-05        |
| NeuN-CA3 | 0.65158947      | 0.65049415    | 0.69145967     | 0.98371735         | 0.6784971          | 0.68001553          | 0.81383077  | 0.66749596      |

**Table S8. Pearson correlation analysis (r value) in Figure 6**

|                     | Latency to fall | Time to touch | Time to remove | Forepaw foot fault | Hindpaw foot fault | Latency to platform | Target time | Latency to dark |
|---------------------|-----------------|---------------|----------------|--------------------|--------------------|---------------------|-------------|-----------------|
| LFB-CTX             | 0.898301        | -0.87988      | -0.92187       | -0.93185           | -0.92679           | -0.7834             | 0.717602    | 0.745231        |
| LFB-EC              | 0.925555        | -0.92439      | -0.94334       | -0.95204           | -0.95139           | -0.79168            | 0.738511    | 0.774838        |
| LFB-STR             | 0.915822        | -0.89372      | -0.91218       | -0.93322           | -0.91161           | -0.79213            | 0.688876    | 0.780024        |
| MBP-CTX             | 0.868032        | -0.89052      | -0.91431       | -0.90433           | -0.8987            | -0.76754            | 0.671694    | 0.661861        |
| MBP-EC              | 0.9075          | -0.92144      | -0.93302       | -0.95453           | -0.93058           | -0.82173            | 0.737293    | 0.765639        |
| MBP-STR             | 0.86401         | -0.85606      | -0.89456       | -0.86867           | -0.85964           | -0.81266            | 0.690281    | 0.758786        |
| SMI32-CTX           | -0.91689        | 0.861622      | 0.89266        | 0.932901           | 0.917276           | 0.73467             | -0.77713    | -0.73852        |
| SMI32-EC            | -0.67055        | 0.803759      | 0.758704       | 0.699539           | 0.69381            | 0.53942             | -0.54828    | -0.59039        |
| SMI32-STR           | -0.88636        | 0.930092      | 0.932197       | 0.878643           | 0.853788           | 0.864338            | -0.79471    | -0.75361        |
| SMI32/MBP ratio-CTX | -0.92546        | 0.908066      | 0.956562       | 0.940657           | 0.916054           | 0.853767            | -0.82715    | -0.82617        |
| SMI32/MBP ratio-EC  | -0.71712        | 0.821077      | 0.787198       | 0.738916           | 0.723701           | 0.604065            | -0.57165    | -0.67405        |
| SMI32/MBP ratio-STR | -0.85875        | 0.897988      | 0.910239       | 0.858246           | 0.836226           | 0.853579            | -0.79572    | -0.75751        |
| Number of NOR       | 0.882345        | -0.90854      | -0.92541       | -0.93198           | -0.93061           | -0.7586             | 0.771114    | 0.696569        |
| Paranode length     | 0.90686         | -0.89759      | -0.92943       | -0.94166           | -0.93256           | -0.79654            | 0.732753    | 0.8276          |

|                        |          |          |          |          |          |          |          |          |
|------------------------|----------|----------|----------|----------|----------|----------|----------|----------|
| Length of paranode gap | -0.52336 | 0.363205 | 0.475748 | 0.545272 | 0.545995 | 0.466124 | -0.35985 | -0.41916 |
|------------------------|----------|----------|----------|----------|----------|----------|----------|----------|

**Table S9. Pearson correlation analysis (p value) in Figure 6**

|                        | Latency to fall | Time to touch | Time to remove | Forepaw foot fault | Hindpaw foot fault | Latency to platform | Target time | Latency to dark |
|------------------------|-----------------|---------------|----------------|--------------------|--------------------|---------------------|-------------|-----------------|
| LFB-CTX                | 2.57E-09        | 1.47E-08      | 1.59E-10       | 3.70E-11           | 7.93E-11           | 5.98E-06            | 7.90E-05    | 2.94E-05        |
| LFB-EC                 | 9.48E-11        | 1.12E-10      | 5.12E-12       | 8.51E-13           | 9.84E-13           | 4.06E-06            | 3.78E-05    | 8.78E-06        |
| LFB-STR                | 3.50E-10        | 4.09E-09      | 5.47E-10       | 2.97E-11           | 5.86E-10           | 3.98E-06            | 0.000197    | 6.97E-06        |
| MBP-CTX                | 3.91E-08        | 5.58E-09      | 4.22E-10       | 1.35E-09           | 2.47E-09           | 1.20E-05            | 0.000325    | 0.000427        |
| MBP-EC                 | 9.48E-10        | 1.68E-10      | 3.07E-11       | 4.79E-13           | 4.50E-11           | 8.51E-07            | 3.95E-05    | 1.30E-05        |
| MBP-STR                | 5.33E-08        | 9.58E-08      | 3.76E-09       | 3.72E-08           | 7.39E-08           | 1.40E-06            | 0.000189    | 1.73E-05        |
| SMI32-CTX              | 3.05E-10        | 6.38E-08      | 4.54E-09       | 3.13E-11           | 2.91E-10           | 4.35E-05            | 7.93E-06    | 3.78E-05        |
| SMI32-EC               | 0.000336        | 2.24E-06      | 1.73E-05       | 0.000142           | 0.00017            | 0.006523            | 0.005539    | 0.002388        |
| SMI32-STR              | 8.25E-09        | 4.85E-11      | 3.50E-11       | 1.64E-08           | 1.13E-07           | 5.20E-08            | 3.51E-06    | 2.12E-05        |
| SMI32/MBP ratio-CTX    | 9.61E-11        | 8.88E-10      | 2.93E-13       | 8.41E-12           | 3.40E-10           | 1.13E-07            | 6.22E-07    | 6.59E-07        |
| SMI32/MBP ratio-EC     | 8.03E-05        | 8.83E-07      | 5.02E-06       | 3.72E-05           | 6.42E-05           | 0.001772            | 0.00352     | 0.000304        |
| SMI32/MBP ratio-STR    | 7.89E-08        | 2.66E-09      | 6.90E-10       | 8.18E-08           | 3.60E-07           | 1.14E-07            | 3.34E-06    | 1.82E-05        |
| Number of NOR          | 1.18E-08        | 8.41E-10      | 9.67E-11       | 3.62E-11           | 4.48E-11           | 1.74E-05            | 1.03E-05    | 0.000156        |
| Paranode length        | 1.02E-09        | 2.77E-09      | 5.36E-11       | 6.99E-12           | 3.30E-11           | 3.21E-06            | 4.66E-05    | 6.06E-07        |
| Length of paranode gap | 0.008679        | 0.081074      | 0.018784       | 0.005857           | 0.005779           | 0.021687            | 0.084137    | 0.041465        |
