# Supplementary material for: Loss of microRNA-15a/16-1 function promotes neuropathological and functional recovery in experimental traumatic brain injury
Source: JCI journal article supplement (doi:10.1172/jci.insight.178650), 2024-06-23

Full unedited gel for Figure 8

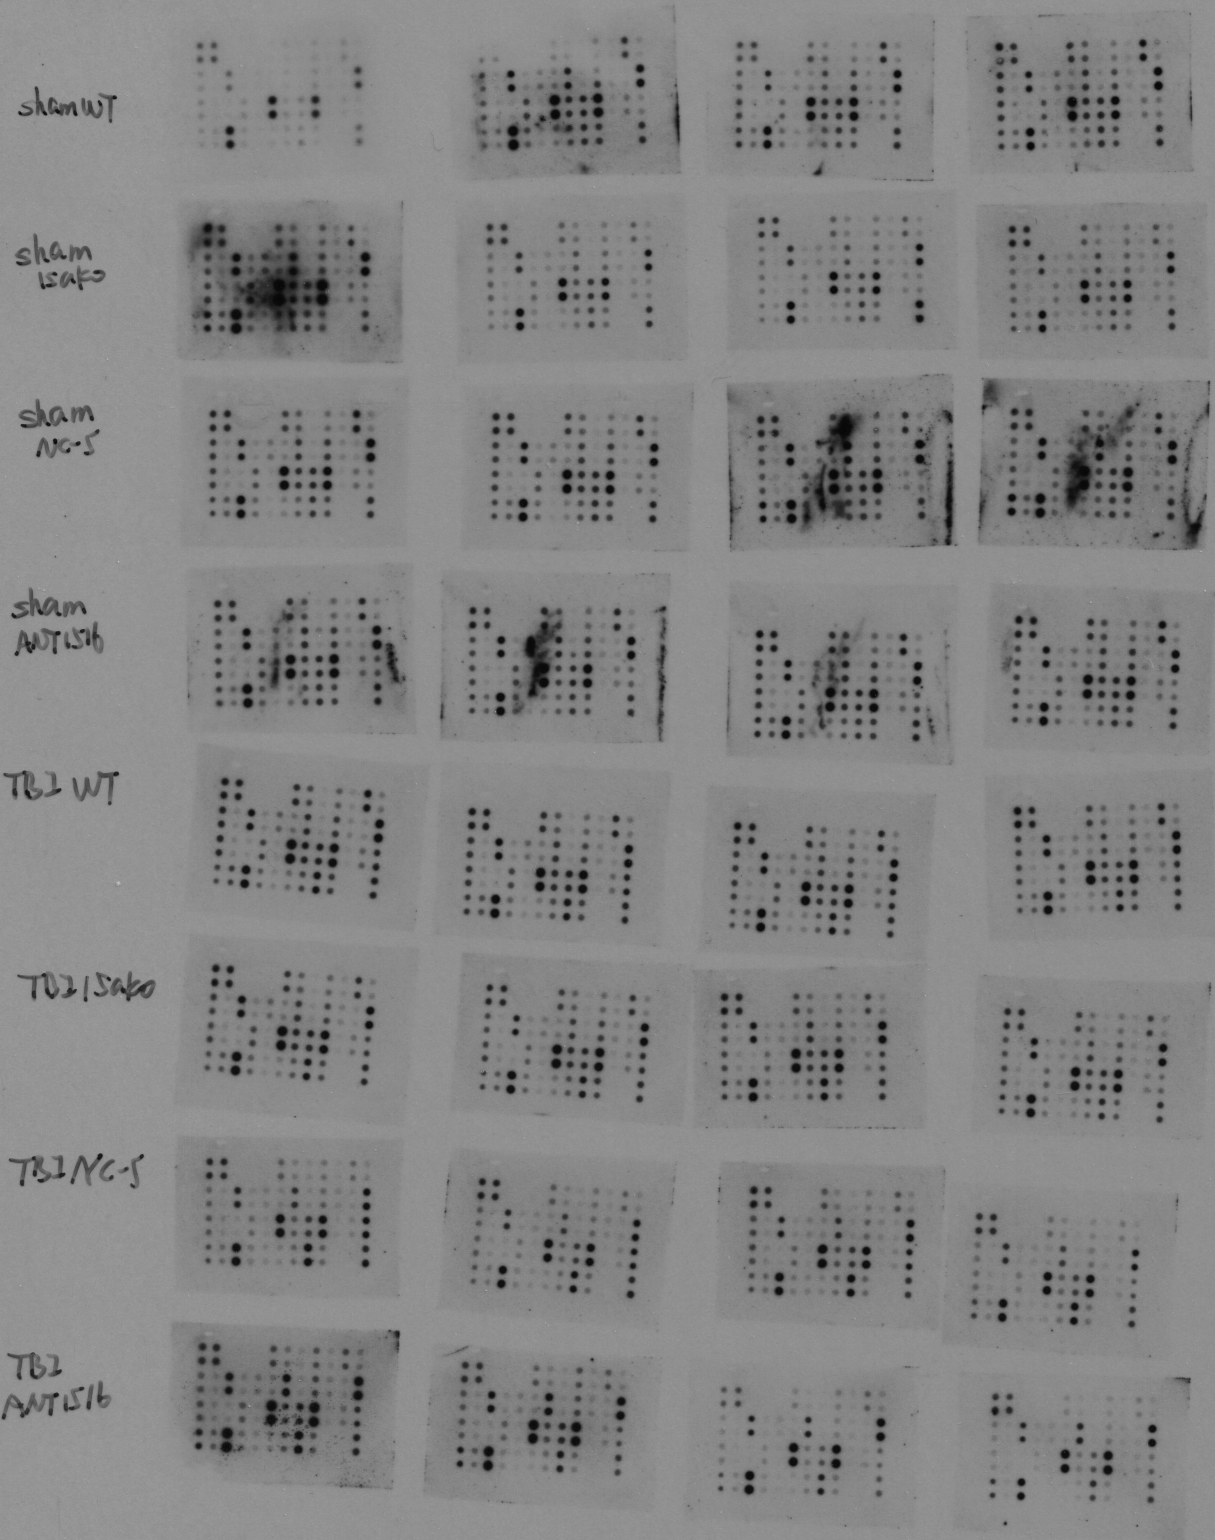

Supplement: sd2 [file 2]
